# Supplementary material
Source: PubMed Central journal article supplement (PMC3760348)
Supplement: NIHMS497692-supplement-Supplementary_Table_1.pdf [file NIHMS497692-supplement-Supplementary_Table_1.pdf]

**Supplemental Table 1. Radiation hybrid maps of each domestic cat autosome and X chromosome, and comparative maps with the human (Hsa) and dog genomes. Coordinates highlighted in blue indicate "out of place" singletons that were not used to define HSBs. Red arrows indicate out of place markers that are moved to define a HSB. Cat markers with no significant hits to the human (Build35) or dog (CanFam1) genome assemblies are filled in**

| Cat Chrom. | Marker       | Map Pos. | LOD | type    | bin interval            | Hsa35 | Hsa35 Start | Hsa35 End   | Dog Chr. | Dog Start  | Dog End    |
|------------|--------------|----------|-----|---------|-------------------------|-------|-------------|-------------|----------|------------|------------|
| A1         | 39063636     | --       | --  | blinded | [p-terminal - FCA752]   | 13    | 24,322,471  | 24,322,572  | 25       | 21,639,647 | 21,639,771 |
| A1         | LG_19_B0     | 0.0      | 1.7 | placed  |                         | 13    | 27,535,216  | 27,535,988  | 25       | 19,591,521 | 19,592,045 |
| A1         | FCA753       | 57.8     | 1.0 | placed  |                         | 13    | 21,861,903  | 21,862,186  | 25       | 19,183,917 | 19,184,240 |
| A1         | FCA1053      | 80.3     | 4.5 | frame   |                         | 13    | 21,669,784  | 21,670,054  | 25       | 16,559,502 | 16,559,625 |
| A1         | FCA752       | 102.9    | 4.5 | frame   |                         | 13    | 25,404,466  | 25,404,995  | 25       | 9,315,380  | 9,315,701  |
| A1         | LG4_A10      | 113.6    | 4.6 | frame   |                         | 13    | 27,322,874  | 27,325,756  | 25       | 14,790,911 | 14,796,324 |
| A1         | FCA214       | 117.1    | 2.7 | placed  |                         | 13    | 28,964,557  | 28,964,659  | 25       | 13,366,537 | 13,366,643 |
| A1         | RD114-63     | 124.4    | --  | --      |                         |       |             |             |          |            |            |
| A1         | FCA755       | --       | --  | blinded | [LG4_A10 - UBL3]        | 13    | 28,964,725  | 28,964,860  | 25       | 13,366,470 | 13,367,022 |
| A1         | FCA754       | --       | --  | blinded | [LG4_A10 - UBL3]        | 13    | 31,533,235  | 31,767,978  | 25       | 11,120,495 | 11,120,683 |
| A1         | BRCA2        | --       | --  | blinded | [LG4_A10 - UBL3]        | 13    | 31,787,616  | 31,871,805  | 25       | 10,713,102 | 10,774,859 |
| A1         | UBL3         | 135.1    | 4.2 | frame   |                         | 13    | 29,239,019  | 29,239,446  | 25       | 13,151,184 | 13,151,620 |
| A1         | FCA721       | 154.9    | 1.3 | frame   |                         | 13    | 37,026,408  | 37,028,851  | 25       | 6,185,041  | 6,185,544  |
| A1         | 38911647     | 167.1    | 1.3 | frame   |                         | 13    | 38,179,779  | 38,179,998  | 25       | 5,215,527  | 5,215,206  |
| A1         | 39040528     | 176.4    | 2.0 | frame   |                         | 13    | 40,265,310  | 40,265,420  | 25       | 3,467,378  | 3,466,999  |
| A1         | FCA274       | 196.5    | 3.9 | frame   |                         |       |             |             |          |            |            |
| A1         | LG9_9_D03    | 220.1    | 3.7 | frame   |                         | 13    | 48,987,510  | 48,987,924  | 22       | 5,156,745  | 5,157,620  |
| A1         | CHDC1        | 247.8    | 3.7 | frame   |                         | 13    | 46,223,180  | 46,223,432  | 22       | 7,504,775  | 7,598,302  |
| A1         | FCA176       | --       | --  | blinded | [CHDC1 - 39005838]      | 13    | 44,013,185  | 44,013,431  | 22       | 30,334,140 | 30,334,249 |
| A1         | LG9_10_E07   | 272.6    | 3.1 | frame   |                         | 13    | 43,851,696  | 43,852,157  | 22       | 9,485,198  | 9,485,660  |
| A1         | 39010395     | 286.3    | 3.1 | frame   |                         | 13    | 42,816,661  | 42,816,924  | 22       | 10,436,420 | 10,436,684 |
| A1         | 39005838     | 299.4    | 1.8 | frame   |                         | 13    | 52,504,090  | 52,504,471  | 22       | 12,996,777 | 12,997,158 |
| A1         | F141         | 311.5    | 1.8 | frame   |                         | 13    | 52,942,900  | 52,946,915  | 22       | 13,405,118 | 13,413,744 |
| A1         | 38995322     | 326.5    | 2.4 | frame   |                         | 13    | 54,240,958  | 54,240,504  | 22       | 14,517,958 | 14,517,291 |
| A1         | 39089120     | 336.2    | 4.8 | frame   |                         | 13    | 55,885,175  | 55,885,348  | 22       | 15,821,195 | 15,821,555 |
| A1         | FCA280       | --       | --  | blinded | [38995322 - LG9-13_H03] | 13    | 58,056,504  | 58,057,025  | 22       | 17,545,302 | 17,545,602 |
| A1         | LG9-13_H03   | 345.8    | 5.9 | frame   |                         | 13    | 60,305,564  | 60,306,889  | 22       | 15,589,407 | 15,589,788 |
| A1         | FCA756       | 406.3    | 2.0 | placed  |                         |       |             |             |          |            |            |
| A1         | LG29_E04     | 451.5    | 5.3 | frame   |                         | 13    | 64,248,688  | 64,248,861  | 22       | 23,119,140 | 23,119,593 |
| A1         | F42          | 461.1    | 1.6 | frame   |                         | 13    | 64,392,058  | 64,408,950  | 22       | 23,212,439 | 23,218,845 |
| A1         | FCA499       | 470.5    | 1.6 | frame   |                         | 13    | 66,701,893  | 66,702,315  | 22       | 25,141,709 | 25,142,147 |
| A1         | FCA757       | 501.1    | 2.0 | placed  |                         | 13    | 73,167,628  | 73,416,310  | 22       | 30,596,470 | 30,596,629 |
| A1         | KLF12        | 506.9    | 1.5 | frame   |                         | 13    | 73,166,746  | 73,166,896  | 22       | 30,640,251 | 30,640,784 |
| A1         | LG9-13_C09   | 518.1    | 0.9 | frame   |                         | 13    | 78,151,157  | 78,151,273  | 22       | 30,630,431 | 30,630,431 |
| A1         | LG9-14_B04   | 524.0    | 1.5 | frame   |                         | 13    | 74,347,644  | 74,348,836  | 22       | 31,677,486 | 31,677,954 |
| A1         | FBXL3A       | 565.8    | 1.4 | frame   |                         | 13    | 76,477,505  | 76,477,617  | 22       | 33,515,688 | 33,515,997 |
| A1         | EDNRB        | 585.7    | 1.4 | frame   |                         | 13    | 77,367,616  | 77,447,665  | 22       | 34,350,983 | 34,372,554 |
| A1         | 38994478     | 611.8    | 1.5 | frame   |                         | 13    | 81,065,514  | 81,065,752  | 22       | 37,294,818 | 37,294,410 |
| A1         | FCA229       | 637.1    | 0.9 | frame   |                         | 13    | 85,266,119  | 85,268,644  | 22       | 40,813,235 | 40,813,672 |
| A1         | FCA758       | 642.1    | 2.4 | placed  |                         | 13    | 86,514,307  | 86,516,352  | 22       | 41,884,591 | 41,888,859 |
| A1         | FCA761       | 676.4    | 2.8 | frame   |                         | 13    | 95,094,967  | 95,095,906  | 22       | 49,243,853 | 49,244,182 |
| A1         | FCA760       | 705.9    | 2.8 | frame   |                         | 13    | 91,983,517  | 91,983,567  | 22       | 51,347,469 | 51,349,700 |
| A1         | LG26_F10     | 727.1    | 5.6 | frame   |                         | 13    | 99,261,130  | 99,262,234  | 22       | 52,752,658 | 52,754,859 |
| A1         | FCA024       | 742.1    | 4.8 | frame   |                         | 13    | 100,406,869 | 100,406,869 | 22       | 53,735,256 | 53,735,464 |
| A1         | 38994385     | 756.9    | 4.8 | frame   |                         | 13    | 101,761,800 | 101,761,953 | 22       | 54,652,327 | 54,652,708 |
| A1         | FCA762       | 777.8    | 1.9 | frame   |                         | 13    | 103,333,578 | 103,333,761 | 22       | 56,792,787 | 56,794,980 |
| A1         | LG9-16_E09   | 797.7    | 1.9 | frame   |                         | 13    | 105,447,003 | 105,447,807 | 22       | 58,080,218 | 58,080,750 |
| A1         | 39088777     | 848.5    | 7.3 | placed  |                         | 13    | 108,877,700 | 108,877,854 | 22       | 60,752,534 | 60,752,807 |
| A1         | FCA218       | 869.8    | 8.9 | placed  |                         | 13    | 110,691,117 | 110,716,028 | 22       | 62,082,984 | 62,088,782 |
| A1         | F10          | 897.3    | 6.6 | placed  |                         | 13    | 112,825,146 | 112,851,842 | 22       | 63,407,136 | 63,418,172 |
| A1         | LAMP1        | 901.9    | 5.5 | placed  |                         | 13    | 112,999,523 | 113,025,742 | 22       | 63,513,854 | 63,516,472 |
| A1         | 39015313     | 916.1    | 4.9 | placed  |                         | 13    | 113,766,853 | 113,766,946 | 22       | 63,920,393 | 63,920,308 |
| A1         | 39060981     | 1089.6   | 5.7 | frame   |                         | 1     | 224,768,997 | 224,769,196 | 14       | 3,278,571  | 3,278,867  |
| A1         | FCA763       | 1098.8   | 4.8 | frame   |                         | 13    | 113,924,949 | 113,925,306 | 16       | 14,541,575 | 14,542,058 |
| A1         | FCA566       | 1108.0   | 1.4 | frame   |                         |       |             |             |          |            |            |
| A1         | GUK1         | 1114.8   | 1.4 | frame   |                         | 1     | 224,634,520 | 224,643,386 | 14       | 3,388,084  | 3,370,414  |
| A1         | GNB2L1       | 1136.4   | 6.1 | frame   |                         | 5     | 180,596,535 | 180,603,491 | 11       | 3,429,100  | 3,433,500  |
| A1         | 39011799     | 1177.5   | 6.7 | frame   |                         | 5     | 177,756,476 | 177,756,546 | 11       | 8,792,443  | 8,792,606  |
| A1         | 39025064     | 1196.5   | 3.7 | frame   |                         | 5     | 114,046,233 | 114,046,285 | 11       | 7,370,721  | 7,371,017  |
| A1         | 39061017     | 1207.3   | 2.4 | frame   |                         | 5     | 116,132,205 | 116,132,394 | 11       | 5,544,302  | 5,544,670  |
| A1         | LG9-13_E03   | 1212.6   | 1.9 | placed  |                         | 5     | 114,786,258 | 114,786,625 | 11       | 6,812,215  | 6,812,596  |
| A1         | LG_17_S33    | 1233.2   | 2.4 | frame   |                         |       |             |             |          |            |            |
| A1         | 39015632     | 1293.3   | 6.6 | frame   |                         | 5     | 122,233,563 | 122,233,706 | 11       | 14,084,850 | 14,084,619 |
| A1         | FCA090       | 1308.6   | 2.1 | frame   |                         | 5     | 122,909,226 | 122,979,039 | 11       | 14,953,338 | 14,953,450 |
| A1         | FCA722       | 1313.5   | 0.5 | placed  |                         | 5     | 124,095,833 | 124,098,099 | 11       | 15,748,366 | 15,748,694 |
| A1         | FCA1054      | 1318.6   | 2.1 | frame   |                         | 5     | 124,096,833 | 124,097,083 | 11       | 15,748,366 | 15,748,694 |
| A1         | FCA723       | 1354.4   | 2.2 | frame   |                         | 5     | 125,526,573 | 125,526,673 | 11       | 16,875,459 | 16,875,863 |
| A1         | 39060502     | 1358.7   | 2.2 | frame   |                         | 5     | 127,013,023 | 127,013,393 | 11       | 18,106,964 | 18,106,736 |
| A1         | IL4          | 1389.0   | 1.2 | placed  |                         | 5     | 132,037,577 | 132,046,269 | 11       | 22,339,786 | 22,348,570 |
| A1         | IL5          | 1393.3   | 3.3 | frame   |                         | 5     | 131,905,408 | 131,905,495 | 11       | 22,192,586 | 22,194,169 |
| A1         | UBE2B        | 1404.0   | 2.2 | placed  |                         | 5     | 133,754,064 | 133,754,368 | 11       | 23,905,292 | 23,905,727 |
| A1         | LG_19_B05    | 1409.0   | 0.3 | frame   |                         | 5     | 133,127,517 | 133,135,808 | 11       | 23,356,918 | 23,361,989 |
| A1         | LG34_E12     | 1414.1   | 2.5 | placed  |                         | 5     | 133,809,100 | 133,809,362 | 11       | 23,954,847 | 23,955,217 |
| A1         | FCA764       | 1428.2   | 0.6 | frame   |                         | 5     | 136,113,658 | 136,113,709 | 11       | 25,920,760 | 25,921,056 |
| A1         | FCA083       | 1436.7   | 0.6 | frame   |                         | 5     | 136,861,968 | 137,099,547 | 11       | 26,716,847 | 26,717,059 |
| A1         | LG25_C09     | 1477.8   | 1.7 | frame   |                         | 5     | 141,215,147 | 141,215,274 | 2        | 37,415,485 | 37,415,657 |
| A1         | GNP1         | 1511.1   | 1.7 | frame   |                         | 5     | 141,365,420 | 141,372,802 | 2        | 37,540,159 | 37,540,356 |
| A1         | 425          | 1516.4   | 4.2 | frame   |                         | 5     | 141,801,807 | 141,801,978 | 2        | 37,922,032 | 37,922,227 |
| A1         | 39077768     | 1519.5   | 1.3 | placed  |                         | 5     | 142,367,060 | 142,367,288 | 2        | 38,445,182 | 38,444,970 |
| A1         | 39082291     | 1528.9   | 4.2 | frame   |                         | 5     | 143,634,769 | 143,634,888 | 2        | 39,600,425 | 39,600,059 |
| A1         | FCA765       | 1547.4   | 2.3 | frame   |                         | 5     | 55,608,904  | 55,609,021  | 2        | 44,049,845 | 44,050,061 |
| A1         | LCC345651    | 1553.1   | 2.6 | placed  |                         | 5     | 56,813,892  | 56,814,034  | 2        | 45,128,111 | 45,128,280 |
| A1         | 39008620     | 1561.4   | 2.3 | frame   |                         | 5     | 57,571,370  | 57,571,513  | 2        | 45,802,424 | 45,802,122 |
| A1         | PPAP2A       | 1572.4   | 1.5 | frame   |                         | 5     | 54,756,561  | 54,756,682  | 2        | 43,338,089 | 43,338,549 |
| A1         | DKFZp761C169 | --       | --  | blinded | [PPAP2A - CKN1]         | 5     | 56,595,445  | 56,595,496  | 2        | 44,929,518 | 44,930,010 |
| A1         | FLJ23654     | 1577.8   | 3.0 | placed  |                         | 5     | 145,422,254 | 145,422,525 | 2        | 41,093,755 | 41,094,033 |
| A1         | FCA766       | 1588.5   | 1.5 | frame   |                         | 5     | 145,114,120 | 145,115,668 | 2        | 40,817,363 | 40,817,661 |
| A1         | CKN1         | 1607.9   | 2.1 | frame   |                         | 5     | 60,222,472  | 60,222,667  | 2        | 48,114,636 | 48,126,047 |
| A1         | TTR1A        | 1616.1   | 2.1 | frame   |                         | 5     | 63,293,634  | 63,293,902  | 2        | 50,623,464 | 50,624,727 |
| A1         | FCA084       | 1634.1   | 3.1 | frame   |                         | 5     | 65,2        |             |          |            |            |

|    |           |        |     |        |                      |            |            |    |            |            |
|----|-----------|--------|-----|--------|----------------------|------------|------------|----|------------|------------|
| A1 | NM_006251 | 2264.3 | 2.4 | frame  | 5                    | 40,800,609 | 40,801,060 | 4  | 71,767,978 | 71,786,859 |
| A1 | nF-AGTT   | 2275.7 | 2.4 | frame  | 5                    | 35,915,326 | 35,915,404 | 4  | 75,805,119 | 75,805,438 |
| A1 | IL7P      | --     | --  | binned | [nF-AGTT - 39011576] |            |            |    |            |            |
| A1 | UCMFC01   | 2290.0 | 2.2 | frame  | 5                    | 33,625,882 | 33,630,558 | 4  | 77,310,170 | 77,312,246 |
| A1 | FCA773    | --     | --  | binned | [UCMFC01 - 39011576] |            |            |    |            |            |
| A1 | NM_194283 | 2292.8 | 3.5 | placed | 5                    | 32,999,494 | 32,999,878 | 4  | 77,808,832 | 77,808,876 |
| A1 | FCA678    | 2295.7 | 0.5 | placed | 5                    | 34,990,717 | 34,990,891 | 4  | 76,518,144 | 76,544,294 |
| A1 | 39011576  | 2298.7 | 2.2 | frame  | 5                    | 33,625,234 | 33,626,913 | 4  | 77,311,627 | 77,314,429 |
| A1 | NM_006713 | 2301.6 | 0.2 | placed | 5                    | 31,871,733 | 31,872,009 | 4  | 78,718,414 | 78,717,950 |
| A1 | FCA129    | 2327.8 | 0.2 | placed | 5                    | 32,637,089 | 32,637,326 | 4  | 78,109,494 | 78,125,405 |
| A1 | FCA357    | 2330.8 | 4.1 | frame  | 5                    | 30,797,880 | 30,798,001 | 4  | 79,626,015 | 79,626,224 |
| A1 | 39025265  | 2343.3 | 4.1 | frame  | 5                    | 29,433,662 | 29,433,891 | 4  | 80,680,867 | 80,681,094 |
| A1 | FCA725    | 2360.2 | 2.0 | frame  | 5                    | 22,578,683 | 22,578,789 | 4  | 85,650,494 | 85,650,825 |
| A1 | 39019915  | 2373.7 | 1.8 | frame  | 5                    | 22,108,737 | 22,109,545 | 4  | 86,067,568 | 86,069,768 |
| A1 | FCA774    | 2383.2 | 1.8 | frame  | 5                    | 19,538,075 | 19,538,183 | 4  | 88,035,211 | 88,035,023 |
| A1 | BASP1     | --     | --  | binned | [FCA774 - 39038423]  |            |            |    |            |            |
| A1 | 39045025  | 2399.2 | 7.5 | frame  | 5                    | 19,274,534 | 19,275,525 | 4  | 88,246,844 | 88,249,083 |
| A1 | 39038423  | 2421.3 | 0.7 | frame  | 5                    | 17,328,750 | 17,329,023 | 4  | 89,554,543 | 89,555,031 |
| A1 | TEB4      | 2439.0 | 0.7 | frame  | 5                    | 16,277,713 | 16,277,775 | 4  | 90,307,994 | 90,308,052 |
| A1 | 39085093  | 2453.8 | 4.3 | frame  | 5                    | 9,009,887  | 9,010,175  | 34 | 8,075,221  | 8,074,494  |
| A1 | FCA775    | 2462.9 | 4.9 | frame  | 5                    | 10,487,211 | 10,487,526 | 34 | 6,821,941  | 6,822,394  |
| A1 | FCA776    | 2472.2 | 2.3 | placed | 5                    | 11,531,344 | 11,531,725 | 34 | 5,890,551  | 5,890,995  |
| A1 | TERT      | 2478.4 | 2.6 | frame  | 5                    | 6,921,144  | 6,921,230  | 34 | 9,863,948  | 9,864,518  |
| A1 | 38974010  | 2490.3 | 2.6 | frame  | 5                    | 4,755,244  | 4,755,404  | 34 | 11,606,919 | 11,607,124 |
| A1 | 39038405  | 2505.4 | 2.7 | frame  | 5                    | 1,306,842  | 1,348,104  | 34 | 14,224,353 | 14,242,830 |
| A1 | NSUN2     | 2514.1 | 2.7 | frame  | 5                    | 3,508,750  | 3,508,965  | 34 | 12,594,411 | 12,594,622 |
|    |           |        |     |        | 5                    | 4,584,628  | 4,584,711  | 34 | 11,741,124 | 11,740,798 |
|    |           |        |     |        | 5                    | 6,652,353  | 6,686,404  | 34 | 10,084,005 | 10,111,556 |

|    |            |        |      |        |    |             |             |    |            |            |
|----|------------|--------|------|--------|----|-------------|-------------|----|------------|------------|
| A2 | GPX4       | 0.0    | 3.7  | frame  | 19 | 1,056,366   | 1,056,510   | 20 | 60,670,000 | 60,670,061 |
| A2 | ADTD       | 7.9    | 3.7  | frame  | 19 | 2,060,995   | 2,111,346   | 20 | 59,951,074 | 59,951,153 |
| A2 | NFIC       | 15.7   | 5.6  | frame  | 19 | 3,407,547   | 3,407,633   | 20 | 58,870,397 | 58,874,793 |
| A2 | Ig_19_29   | 4.9    | 0.6  | frame  | 19 | 4,843,078   | 4,843,078   | 20 | 57,726,974 | 57,727,370 |
| A2 | RANBP3     | 44.2   | 0.6  | frame  | 19 | 5,876,154   | 5,938,113   | 20 | 57,020,771 | 57,021,118 |
| A2 | LG25_D04   | 81.0   | 5.9  | frame  | 19 | 8,628,726   | 8,629,169   | 20 | 56,011,495 | 56,011,883 |
| A2 | 39085100   | 100.1  | 4.6  | placed | 19 | 8,470,570   | 8,470,667   | 20 | 55,906,982 | 55,907,291 |
| A2 | 39087702   | 105.5  | 3.7  | frame  | 19 | 7,522,243   | 7,522,335   | 20 | 55,206,729 | 55,206,482 |
| A2 | 39060060   | 113.9  | 0.7  | frame  | 19 | 10,791,645  | 10,791,749  | 20 | 53,273,152 | 53,273,257 |
| A2 | 39006639   | --     | --   | binmed | 19 | 14,415,280  | 14,415,435  | 20 | 51,039,673 | 51,039,508 |
| A2 | PTD008     | 119.5  | 2.6  | placed | 19 | 12,640,162  | 12,640,239  | 20 | 52,307,914 | 52,308,441 |
| A2 | LG_20_87   | 133.8  | 2.6  | frame  | 19 | 9,863,923   | 9,864,097   | 20 | 53,990,417 | 53,990,748 |
| A2 | LG9-10_H12 | 144.7  | 0.7  | frame  | 19 | 9,102,865   | 9,104,245   | 20 | 54,508,303 | 54,509,492 |
| A2 | MAN291     | 152.7  | 3.7  | frame  | 19 | 12,636,619  | 12,636,619  | 20 | 52,209,297 | 52,209,333 |
| A2 | RAD23A     | 160.6  | 0.8  | frame  | 19 | 12,919,661  | 12,919,824  | 20 | 52,109,521 | 52,111,650 |
| A2 | FCA777     | 170.9  | 0.8  | frame  | 19 | 9,734,904   | 9,735,185   | 20 | 54,094,610 | 54,094,761 |
| A2 | FCA778     | 203.5  | 3.0  | frame  | 19 | 15,773,194  | 15,775,511  | 20 | 49,415,599 | 49,416,013 |
| A2 | INSL3      | 214.6  | 1.7  | frame  | 19 | 17,788,670  | 17,788,785  | 20 | 47,931,596 | 47,931,915 |
| A2 | LG9-14_C02 | 222.8  | 1.7  | frame  | 19 | 19,185,695  | 19,186,296  | 20 | 46,827,946 | 46,828,404 |
| A2 | KIAA0892   | 231.2  | 1.4  | placed | 19 | 19,330,345  | 19,330,548  | 20 | 46,723,489 | 46,724,024 |
| A2 | CCR3       | 248.3  | 2.1  | frame  | 3  | 46,282,026  | 46,282,166  | 20 | 45,238,945 | 45,239,189 |
| A2 | CCP5       | 248.3  | 2.1  | frame  | 3  | 46,386,642  | 46,392,695  | 20 | 45,150,328 | 45,151,649 |
| A2 | FCA052     | --     | --   | binmed | 3  | 45,917,415  | 45,917,895  | 20 | 45,464,194 | 45,464,363 |
| A2 | FCA726     | 253.6  | 2.0  | placed | 3  | 46,616,209  | 46,619,602  | 20 | 44,979,502 | 44,979,871 |
| A2 | MYL3       | 253.6  | 2.0  | placed | 3  | 46,875,964  | 46,876,079  | 20 | 44,800,349 | 44,802,226 |
| A2 | IMPDH2     | 261.7  | 0.9  | placed | 3  | 49,035,492  | 49,035,627  | 20 | 42,996,267 | 42,996,990 |
| A2 | APEH       | 269.8  | 1.4  | frame  | 3  | 49,686,438  | 49,695,937  | 20 | 42,442,564 | 42,451,668 |
| A2 | FCA581     | 272.4  | 0.6  | placed | 3  | 50,393,889  | 50,394,150  | 20 | 41,831,018 | 41,831,263 |
| A2 | COL7A1     | 277.5  | 1.8  | placed | 3  | 48,578,619  | 48,577,719  | 20 | 43,405,337 | 43,405,569 |
| A2 | FCA056     | 283.0  | 2.4  | frame  | 3  | 51,079,972  | 51,099,389  | 20 | 41,178,919 | 41,179,111 |
| A2 | MGC39725   | 290.6  | 2.4  | frame  | 3  | 51,872,074  | 51,872,153  | 20 | 40,710,287 | 40,710,738 |
| A2 | LG9-13_G10 | 309.5  | 1.2  | frame  | 3  | 52,546,291  | 52,546,780  | 20 | 40,104,050 | 40,104,519 |
| A2 | PRKD       | 320.2  | 1.2  | frame  | 3  | 53,170,265  | 53,201,771  | 20 | 39,573,513 | 39,599,441 |
| A2 | TLR9       | 331.5  | 2.5  | frame  | 3  | 52,232,619  | 52,232,619  | 20 | 40,382,642 | 40,386,451 |
| A2 | NM_014041  | 334.4  | 1.5  | placed | 3  | 52,715,858  | 52,715,935  | 20 | 39,941,379 | 39,942,875 |
| A2 | LG_18.94   | 342.8  | 1.1  | placed | 3  | 55,316,292  | 55,317,683  | 20 | 37,789,121 | 37,791,253 |
| A2 | TKT        | 348.2  | 2.5  | frame  | 3  | 53,234,711  | 53,265,069  | 20 | 39,540,591 | 39,555,895 |
| A2 | FCA355     | 359.1  | 2.4  | frame  | 3  | 56,584,092  | 56,584,184  | 20 | 36,633,550 | 36,633,674 |
| A2 | 38989999   | 381.5  | 1.2  | frame  | 3  | 59,645,476  | 59,645,702  | 20 | 33,989,543 | 33,999,762 |
| A2 | LG1_F07    | 407.0  | 0.6  | placed | 3  | 57,148,067  | 57,148,309  | 20 | 36,131,936 | 36,132,192 |
| A2 | LG9-16_F08 | 429.0  | 1.2  | frame  | 3  | 59,340,449  | 59,341,018  | 20 | 34,258,843 | 34,259,402 |
| A2 | 39028769   | 442.3  | 2.3  | frame  | 3  | 61,769,343  | 61,769,559  | 20 | 32,099,061 | 32,099,278 |
| A2 | LG25_A09   | 450.2  | 0.2  | placed | 3  | 62,407,221  | 62,407,663  | 20 | 31,500,649 | 31,501,082 |
| A2 | LG9-14_A06 | 452.8  | 2.3  | frame  | 3  | 61,782,186  | 61,783,312  | 20 | 32,100,242 | 32,100,365 |
| A2 | LG9-14_B05 | 469.2  | 0.3  | placed | 3  | 62,959,055  | 62,959,580  | 20 | 30,964,652 | 30,965,124 |
| A2 | 38995375   | 491.4  | 3.9  | frame  | 3  | 63,083,053  | 63,083,335  | 20 | 30,832,784 | 30,833,062 |
| A2 | LG9-14_E03 | 501.9  | 3.9  | frame  | 3  | 63,112,600  | 63,112,965  | 20 | 30,812,040 | 30,812,443 |
| A2 | LG9-16_D05 | 527.4  | 3.4  | frame  | 3  | 68,972,698  | 68,973,367  | 20 | 25,724,113 | 25,724,464 |
| A2 | 39014174   | 542.8  | 3.4  | frame  | 3  | 68,539,913  | 68,539,867  | 20 | 26,089,461 | 26,099,533 |
| A2 | LG7_H05    | 579.9  | 3.6  | frame  | 3  | 70,947,539  | 70,956,648  | 20 | 24,006,712 | 24,019,052 |
| A2 | FCA304     | 605.2  | 3.6  | frame  | 3  | 67,471,611  | 67,471,649  | 20 | 27,179,898 | 27,179,935 |
| A2 | FCA779     | 624.6  | 2.4  | frame  | 3  | 1,434,903   | 1,435,048   | 20 | 18,736,452 | 18,736,817 |
| A2 | 39082102   | 640.6  | 4.6  | frame  | 3  | 75,013,035  | 75,013,426  | 20 | 20,319,156 | 20,319,547 |
| A2 | LG6_E0110  | 647.9  | 4.6  | frame  | 3  | 539,276     | 539,462     | 20 | 19,522,362 | 19,522,614 |
| A2 | 39088851   | 686.0  | 10.1 | frame  | 3  | 4,106,090   | 4,106,090   | 20 | 12,462,776 | 12,463,097 |
| A2 | 39087046   | 723.7  | 6.1  | frame  | 3  | 6,100,583   | 6,100,747   | 20 | 6,197,829  | 6,198,011  |
| A2 | FCA687     | 738.2  | 5.9  | frame  | 3  | 8,327,446   | 8,327,884   | 20 | 12,600,403 | 12,600,894 |
| A2 | 39041903   | 747.6  | 5.9  | frame  | 3  | 7,687,073   | 7,687,218   | 20 | 7,485,149  | 7,485,538  |
| A2 | LC26_A11   | 767.1  | 6.4  | frame  | 3  | 7,206,556   | 7,206,845   | 20 | 13,585,508 | 13,585,765 |
| A2 | LC555831   | 786.3  | 6.4  | frame  | 3  | 9,980,693   | 9,980,693   | 20 | 11,155,819 | 11,162,284 |
| A2 | MDS027     | 827.8  | 5.4  | placed | 3  | 10,143,322  | 10,143,519  | 20 | 11,067,961 | 11,068,160 |
| A2 | 39064368   | 872.7  | 7.9  | frame  | 3  | 11,806,962  | 11,807,063  | 20 | 9,548,779  | 9,548,880  |
| A2 | PPARG      | 881.6  | 7.9  | frame  | 3  | 12,304,366  | 12,450,847  | 20 | 8,979,885  | 9,029,988  |
| A2 | RHC        | 892.8  | 8.5  | frame  | 3  | 130,734,071 | 130,734,211 | 20 | 8,477,984  | 8,477,990  |
| A2 | 39038136   | 913.7  | 10.7 | frame  | 3  | 14,533,374  | 14,533,374  | 20 | 7,485,177  | 7,485,366  |
| A2 | LG31_E05   | 944.0  | 0.7  | placed | 3  | 15,002,058  | 15,002,714  | 20 | 7,914,302  | 7,915,118  |
| A2 | LG_17.89   | 982.4  | 3.1  | placed | 3  | 128,529,189 | 128,529,614 | 20 | 4,290,120  | 4,290,530  |
| A2 | 38995590   | 994.8  | 5.5  | frame  | 3  | 128,279,002 | 128,279,121 | 20 | 4,054,040  | 4,054,157  |
| A2 | 39039410   | 1006.6 | 5.0  | frame  | 3  | 127,705,548 | 127,705,649 | 20 | 3,531,277  | 3,531,157  |
| A2 | LG34_F10   | 1019.3 | 5.0  | frame  | 3  | 129,695,065 | 129,697,025 | 20 | 5,323,441  | 5,323,866  |
| A2 | FCA780     | 1025.3 | 2.9  | placed | 3  | 13,148,676  | 13,149,048  | 20 | 6,290,299  | 6,290,688  |
| A2 | KIAA1886   | 1080.9 | 5.5  | frame  | 7  | 44,678,209  | 44,688,891  | Un |            |            |
| A2 | 39079347   | 1094.9 | 5.5  | frame  | 7  | 47,720,967  | 47,721,095  | Un |            |            |
| A2 | 39161075   | 1111.0 | 7.7  | frame  | 7  | 49,206,525  | 49,206,598  | 18 | 3,779,393  | 3,779,686  |
| A2 | DDC        | 1146.2 | 12.3 | frame  | 7  | 50,300,351  | 50,407,316  | 18 | 4,656,983  | 4,712,727  |
| A2 | FALV016    | 1181.5 | 0.2  | placed | 7  |             |             | 18 |            |            |
| A2 | FCA781     | 1192.9 | 6.2  | frame  | 7  | 52,014,550  | 52,015,962  | 18 | 5,982,660  | 5,984,793  |
| A2 | LG_19.15   | 1212.3 | 2.1  | frame  | 7  | 53,240,559  | 53,249,470  | 18 | 7,374,543  | 7,381,168  |
| A2 | 39089967   | 1224.2 | 1.2  | frame  | 7  | 55,043,071  | 55,043,265  | 18 | 8,890,727  | 8,890,493  |
| A2 | FCA782     | 1238.6 | 1.0  | frame  | 7  | 43,600,741  | 43,620,165  | 18 | 9,278,494  | 9,302,008  |
| A2 | INHBA      | 1261.3 | 1.9  | frame  | 7  | 41,463,636  | 41,515,519  | 18 | 11,194,076 | 11,484,218 |
| A2 | 39036411   | 1263.6 | 3.9  | placed | 7  | 40,590,312  | 40,590,585  | 18 | 11,876,551 | 11,976,736 |
| A2 | LG1_H05    | 1270.7 | 1.9  | frame  | 7  | 39,315,337  | 39,315,705  | 18 | 13,055,129 | 13,055,466 |
| A2 | TCRG       | 1287.9 | 5.8  | frame  | 7  | 38,078,307  | 38,078,451  | 18 | 14,329,219 | 14,413,797 |
| A2 | 38974778   | 1305.7 | 3.8  | frame  | 7  | 107,189,857 | 107,189,992 | 18 | 15,529,587 | 15,529,705 |
| A2 | 39036217   | 1326.6 | 1.9  | frame  | 7  | 105,803,198 | 105,803,365 | 18 | 16,731,859 | 16,732,592 |
| A2 | FCA783     | 1332.6 | 1.8  | frame  | 7  | 103,939,716 | 103,931,124 | 18 | 18,484,300 | 18,484,681 |
| A2 | 39051924   | 1363.3 | 1.8  | frame  | 7  | 76,720,372  | 76,720,684  | 18 | 20,400,199 | 20,400,814 |
| A2 | HGF        | 1391.0 | 4.7  | frame  | 7  | 80,976,546  | 80,976,726  | 18 | 34,704,703 | 34,774,641 |
| A2 | FCA784     | 1401.4 | 4.7  | frame  | 7  | 84,944,621  | 84,944,844  | 18 | 31,209,603 | 31,209,832 |
| A2 | 39036621   | 1414.6 | 2.4  | frame  | 7  | 88,619,673  | 88,619,756  | 14 | 17,806,294 | 17,805,778 |
| A2 | ABC81      | 1422.2 | 2.4  | frame  | 7  | 86,805,259  | 86,805,465  | 14 | 16,192,150 | 16,273,342 |
| A2 | FCA124     | 1432.6 | 3.8  | frame  | 7  | 85,985,025  | 85,984,140  | 14 | 15,474,603 | 15,476,660 |
| A2 | CALCR      | 1451.8 | 4.4  | frame  | 7  | 92,698,450  | 92,848,687  | 14 | 21,460,244 | 21,611,178 |
| A2 | FCA656     | 1476.7 | 7.2  | frame  | 7  | 97,006,561  | 97,014,434  | 14 | 25,175,167 | 25,182,809 |
| A2 | 38989908   | 1490.5 | 4.2  | frame  | 7  | 8,373,386   | 8,374,072   | 14 | 26,629,088 | 26,629,736 |
| A2 | FCA105     | 1505.3 | 4.2  | frame  | 7  | 30,299,010  | 30,299,510  | 14 | 45,789,228 | 45,791,310 |
| A2 | FCA340     | 1506.9 | 5.5  | frame  | 7  | 17,437,781  | 17,437,485  | 14 | 34,551,633 | 34,551,813 |
| A2 | 38974589   | 1544.6 | 5.5  | frame  | 7  | 16,510,889  | 16,511,056  | 14 | 33,752,558 | 33,752,755 |
| A2 | LG9-16_G09 | 1566.9 | 1.9  | frame  | 7  | 30,849,296  | 30,849,944  | 14 | 46,247,370 | 46,248,072 |
| A2 | LG9-16_F11 | 1582.0 | 1.9  | frame  | 7  | 29,899,419  | 29,900,003  | 14 | 45,426,569 | 45,427,200 |
| A2 | LG30_A08   | 1593.5 | 2.4  | placed | 7  | 27,969,931  | 27,972,912  | 14 | 43,809,791 | 43,812,151 |
| A2 | Fc_102024  | 1598.9 | 2.1  | frame  | 7  | 26,709,746  | 26,709,810  | 14 | 45,267,855 | 45,267,995 |
| A2 | TAK1BP1    | 1618.4 | 2.1  | frame  | 7  | 27,727,198  | 27,728,881  | 14 | 43,411,701 | 43,497,376 |
| A2 | FCA621     | 1631.0 | 0.3  | placed | 7  | 27,065,528  | 27,066,019  | 14 | 43,021,809 | 43,021,927 |
| A2 | IL6        |        |      |        |    |             |             |    |            |            |

|    |            |        |      |        |                    |
|----|------------|--------|------|--------|--------------------|
| A3 | C5NK2A     | 0.0    | 5.3  | frame  |                    |
| A3 | 39027719   | 25.5   | 5.5  | frame  |                    |
| A3 | ASIF       | 36.3   | 4.7  | placed |                    |
| A3 | AHCF       | 41.3   | 8.7  | frame  |                    |
| A3 | NM_152666  | 51.6   | 2.1  | placed |                    |
| A3 | LG26_D02   | 72.6   | 2.7  | placed |                    |
| A3 | BLCAP      | 84.8   | 4.2  | frame  |                    |
| A3 | SRC        | 92.0   | 4.2  | frame  |                    |
| A3 | UBEC2      | 109.3  | 7.8  | frame  |                    |
| A3 | FCA794     | 114.1  | 2.2  | placed |                    |
| A3 | FCA729     | 127.2  | 7.6  | frame  |                    |
| A3 | 39010936   | 146.6  | 2.0  | placed |                    |
| A3 | YWHAB      | 151.9  | 4.4  | placed |                    |
| A3 | LG_19_02   | 154.5  | 3.8  | frame  |                    |
| A3 | LG_A02     | 166.1  | 2.9  | placed |                    |
| A3 | LG3_G01    | 171.9  | 3.6  | frame  |                    |
| A3 | FCA102     | 179.8  | 1.3  | frame  |                    |
| A3 | STK15      | 192.6  | 1.3  | frame  |                    |
| A3 | SANG       | 216.3  | 5.2  | frame  |                    |
| A3 | TCFL5      | 240.1  | 2.9  | frame  |                    |
| A3 | 38995002   | 258.8  | 2.9  | frame  |                    |
| A3 | FCA688     | 282.2  | 0.4  | placed |                    |
| A3 | LG29_H12   | 284.8  | 1.6  | frame  |                    |
| A3 | FCA795     | 293.0  | 1.6  | frame  |                    |
| A3 | 3903796    | 330.3  | 2.2  | frame  |                    |
| A3 | CHGB       | 347.1  | 2.2  | frame  |                    |
| A3 | PRNP       | 376.5  | 3.7  | frame  |                    |
| A3 | FCA797     | --     | --   | binmed | [FCA796 - PLCB4]   |
| A3 | FCA514     | 424.3  | 1.7  | placed |                    |
| A3 | PLCB4      | 444.8  | 6.5  | frame  |                    |
| A3 | LG34_F02   | 470.6  | 2.7  | placed |                    |
| A3 | FCA080     | 499.2  | 6.5  | frame  |                    |
| A3 | FCA798     | 527.0  | 3.2  | placed |                    |
| A3 | 39015825   | 547.0  | 7.5  | frame  |                    |
| A3 | 38995411   | 574.7  | 7.5  | frame  |                    |
| A3 | LG3_D12    | 628.9  | 0.7  | placed |                    |
| A3 | 39029284   | 654.4  | 4.5  | frame  |                    |
| A3 | LG21_G11   | 671.2  | 4.5  | frame  |                    |
| A3 | 39038425   | 707.4  | 9.3  | frame  |                    |
| A3 | 39047725   | 711.9  | 0.8  | placed |                    |
| A3 | 39160897   | 747.7  | 10.9 | frame  |                    |
| A3 | 39012307   | 785.5  | 3.4  | frame  |                    |
| A3 | 39055743   | 784.2  | 0.6  | frame  |                    |
| A3 | FCA498     | 812.1  | 0.6  | frame  |                    |
| A3 | 38995409   | 822.3  | 0.6  | frame  |                    |
| A3 | Z7F26L2    | --     | --   | binmed | [39055743 - LHCGR] |
| A3 | 39038630   | 847.4  | 2.3  | placed |                    |
| A3 | 38995546   | 870.2  | 0.8  | placed |                    |
| A3 | LHCGR      | 880.6  | 8.3  | frame  |                    |
| A3 | FCA799     | 901.9  | 2.8  | frame  |                    |
| A3 | FCA208     | 920.4  | 1.8  | frame  |                    |
| A3 | TN14       | 933.1  | 1.8  | frame  |                    |
| A3 | FCA536     | 954.5  | 0.2  | placed |                    |
| A3 | LG5_D12M   | 961.9  | 2.3  | frame  |                    |
| A3 | LG35_D03   | 974.7  | 1.2  | frame  |                    |
| A3 | GCT4       | 987.5  | 1.2  | frame  |                    |
| A3 | MDH1       | 1000.2 | 3.2  | frame  |                    |
| A3 | FCA800     | 1010.4 | 3.2  | frame  |                    |
| A3 | NM_006759  | 1023.5 | 1.2  | placed |                    |
| A3 | 39063535   | 1028.7 | 1.0  | frame  |                    |
| A3 | 39012619   | 1048.3 | 2.4  | frame  |                    |
| A3 | FLJ13057   | 1056.2 | 1.4  | frame  |                    |
| A3 | PCBP1      | 1066.2 | 1.4  | frame  |                    |
| A3 | 433        | 1076.9 | 1.3  | placed |                    |
| A3 | LG33_H08   | 1087.8 | 2.5  | frame  |                    |
| A3 | 38970499   | 1095.6 | 2.4  | frame  |                    |
| A3 | HK2        | 1103.5 | 2.4  | frame  |                    |
| A3 | FCA161     | 1123.4 | 1.2  | frame  |                    |
| A3 | FCA801     | 1135.3 | 1.2  | frame  |                    |
| A3 | 39019912   | 1172.5 | 4.5  | frame  |                    |
| A3 | 38989899   | 1186.8 | 4.5  | frame  |                    |
| A3 | C3BA       | 1210.1 | 1.4  | placed |                    |
| A3 | IGKC       | 1220.8 | 2.3  | frame  |                    |
| A3 | LG33_B06   | 1229.1 | 1.7  | placed |                    |
| A3 | SLC20A1    | 1234.6 | 2.3  | frame  |                    |
| A3 | IL1A       | 1247.5 | 7.6  | frame  |                    |
| A3 | ADRA2B     | 1267.1 | 1.0  | placed |                    |
| A3 | MPT        | 1286.7 | 9.3  | frame  |                    |
| A3 | FCA181     | 1324.8 | 5.9  | frame  |                    |
| A3 | NSE1       | 1345.0 | 5.9  | frame  |                    |
| A3 | LG3_H06    | 1370.9 | 3.9  | frame  |                    |
| A3 | ODC1       | 1383.6 | 2.1  | frame  |                    |
| A3 | 39181074   | 1400.2 | 2.1  | frame  |                    |
| A3 | FCA334     | 1429.6 | 2.1  | frame  |                    |
| A3 | YWHAQ      | 1454.1 | 3.7  | frame  |                    |
| A3 | MYCN       | 1463.5 | 3.7  | frame  |                    |
| A3 | APOB       | 1486.1 | 3.3  | frame  |                    |
| A3 | 38994323   | 1495.0 | 3.3  | frame  |                    |
| A3 | LG9-16_A02 | 1507.9 | 3.7  | frame  |                    |
| A3 | 38916875   | --     | --   | binmed | [LG9-16_A02 - XDH] |
| A3 | NM_033253  | --     | --   | binmed | [LG9-16_A02 - XDH] |
| A3 | 39025035   | 1529.4 | 3.7  | frame  |                    |
| A3 | XDH        | 1549.6 | 6.1  | frame  |                    |
| A3 | 38987844   | 1552.7 | 0.5  | placed |                    |
| A3 | FCA802     | 1558.9 | 4.3  | frame  |                    |
| A3 | 39025326   | 1573.9 | 2.2  | frame  |                    |
| A3 | FCA493     | 1598.8 | 2.2  | frame  |                    |
| A3 | PPP1CB     | 1626.5 | 2.2  | frame  |                    |
| A3 | 39015680   | 1644.2 | 2.2  | frame  |                    |

|    |             |             |    |            |            |
|----|-------------|-------------|----|------------|------------|
| 20 | 412,440     | 416,122     | 24 | 23,304,407 | 23,308,735 |
| 20 | 30,209,255  | 30,209,403  | 24 | 24,489,364 | 24,489,538 |
| 20 | 32,320,509  | 32,320,634  | 24 | 26,315,908 | 26,320,201 |
| 20 | 32,341,987  | 32,342,117  | 24 | 26,340,920 | 26,341,307 |
| 20 | 33,458,200  | 33,462,651  | 24 | 27,307,298 | 27,307,725 |
| 20 | 31,705,424  | 31,706,125  | 24 | 25,801,560 | 25,802,370 |
| 20 | 35,580,640  | 35,580,912  | 24 | 29,047,085 | 29,047,386 |
| 20 | 35,445,485  | 35,467,239  | 24 | 28,929,342 | 28,950,053 |
| 20 | 43,873,100  | 43,873,449  | 24 | 38,041,121 | 38,043,347 |
| 20 | 42,689,795  | 42,689,912  | 24 | 35,024,682 | 35,024,907 |
| 20 | 43,141,285  | 43,141,985  | 24 | 35,400,467 | 35,400,870 |
| 20 | 48,156,063  | 48,156,466  | 24 | 39,513,939 | 39,514,434 |
| 20 | 42,969,069  | 42,969,165  | 24 | 35,262,174 | 35,262,442 |
| 20 | 49,579,650  | 49,580,784  | 24 | 40,665,797 | 40,666,050 |
| 20 | 50,720,001  | 50,720,932  | 24 | 41,582,573 | 41,582,922 |
| 20 | 51,661,474  | 51,661,705  | 24 | 42,381,866 | 42,382,105 |
| 20 | 51,066,087  | 51,066,304  | 24 | 41,867,343 | 41,867,436 |
| 20 | 54,377,852  | 54,400,703  | 24 | 44,515,461 | 44,515,868 |
| 20 | 56,919,136  | 56,919,461  | 24 | 46,590,167 | 46,590,815 |
| 20 | 60,943,352  | 60,943,490  | 24 | 49,689,710 | 49,689,986 |
| 20 | 62,342,498  | 62,342,620  | 24 | 50,680,576 | 50,681,313 |
| 20 | 40,330,642  | 40,331,297  | 24 | 33,117,999 | 33,118,819 |
| 20 | 40,328,004  | 40,329,542  | 24 | 33,115,659 | 33,116,904 |
| 20 | 38,644,915  | 38,645,019  | 24 | 31,608,216 | 31,608,537 |
| 20 | 6,411,133   | 6,411,448   | 24 | 18,486,496 | 18,486,795 |
| 20 | 5,840,106   | 5,854,003   | 24 | 18,931,862 | 18,944,710 |
| 20 | 4,627,883   | 4,628,626   | 24 | 19,863,979 | 19,864,724 |
| 20 | 6,766,977   | 6,767,438   | 24 | 18,163,233 | 18,163,427 |
| 20 | 7,010,634   | 7,011,168   | 24 | 17,938,054 | 17,938,653 |
| 20 | 9,407,800   | 9,407,935   | 24 | 15,767,536 | 15,767,854 |
| 20 | 12,520,790  | 12,521,196  | 24 | 12,938,155 | 12,938,599 |
| 20 | 14,154,062  | 14,154,441  | 24 | 11,451,850 | 11,452,157 |
| 20 | 19,006,783  | 19,006,826  | 24 | 7,165,004  | 7,165,032  |
| 20 | 17,092,620  | 17,092,771  | 24 | 8,832,043  | 8,831,503  |
| 20 | 20,900,394  | 20,900,709  | 24 | 5,464,898  | 5,464,321  |
| 20 | 24,949,056  | 24,949,247  | 23 | 4,210,577  | 4,210,868  |
| 20 | 25,238,080  | 25,238,215  | 23 | 4,500,671  | 4,501,034  |
| 20 | 25,515,997  | 25,516,429  | 23 | 4,732,853  | 4,733,147  |
| 2  | 107,087,124 | 107,087,269 | 10 | 40,034,140 | 40,034,300 |
| 2  | 106,177,429 | 106,177,513 | 10 | 40,649,304 | 40,649,449 |
| 2  | 103,053,911 | 103,054,027 | 10 | 43,340,224 | 43,340,511 |
| 2  | 101,014,704 | 101,014,833 | 10 | 45,153,498 | 45,153,750 |
| 2  | 96,954,214  | 96,954,339  | 10 | 48,369,997 | 48,369,780 |
| 2  | 99,626,454  | 100,086,555 | 10 | 46,215,821 | 46,216,128 |
| 2  | 98,958,791  | 98,958,993  | 10 | 47,036,177 | 47,036,515 |
| 2  | 43,367,259  | 43,367,457  | 10 | 49,007,227 | 49,007,590 |
| 2  | 45,384,098  | 45,384,298  | 10 | 50,897,347 | 50,897,802 |
| 1  | 244,423,841 | 244,424,040 | 14 | 4,085,788  | 4,085,581  |
| 2  | 48,825,564  | 48,894,498  | 10 | 53,803,755 | 53,837,316 |
| 2  | 50,604,210  | 51,171,936  | 10 | 55,879,781 | 55,880,131 |
| 2  | 51,814,399  | 51,814,850  | 10 | 56,469,869 | 56,470,039 |
| 2  | 55,110,975  | 55,189,385  | 10 | 59,259,673 | 59,300,665 |
| 2  | 58,187,606  | 58,298,502  | 10 | 61,803,601 | 61,803,796 |
| 2  | 60,490,757  | 60,492,943  | 10 | 63,872,469 | 63,874,550 |
| 2  | 62,367,779  | 62,368,210  | 10 | 65,530,604 | 65,531,030 |
| 2  | 62,006,905  | 62,027,679  | 10 | 65,248,633 | 65,253,487 |
| 2  | 63,733,271  | 63,745,979  | 10 | 66,702,676 | 66,714,886 |
| 2  | 53,987,524  | 53,987,879  | 10 | 58,229,793 | 58,231,848 |
| 2  | 64,030,059  | 64,030,261  | 10 | 66,930,045 | 66,978,107 |
| 2  | 65,852,916  | 65,853,232  | 10 | 68,495,095 | 68,495,747 |
| 2  | 68,126,149  | 68,126,351  | 10 | 70,506,494 | 70,506,864 |
| 2  | 70,017,869  | 70,018,211  | 10 | 71,909,588 | 71,910,108 |
| 2  | 70,227,385  | 70,227,779  | 10 | 72,071,259 | 72,071,878 |
| 2  | 67,893,922  | 67,894,219  | 10 | 70,316,752 | 70,317,020 |
| 2  | 71,140,615  | 71,142,353  | 10 | 72,693,648 | 72,695,627 |
| 2  | 75,006,391  | 75,006,584  | 17 | 51,112,608 | 51,112,321 |
| 2  | 74,972,914  | 75,030,768  | 17 | 51,087,993 | 51,148,019 |
| 2  | 73,151,258  | 73,151,624  | 17 | 52,633,356 | 52,633,759 |
| 2  | 73,435,865  | 73,435,958  | 17 | 52,376,478 | 52,376,831 |
| 2  | 80,635,598  | 80,635,789  | 17 | 46,425,086 | 46,424,522 |
| 2  | 83,827,007  | 83,827,318  | 17 | 43,740,609 | 43,740,048 |
| 2  | 86,929,109  | 86,929,181  | 17 | 41,194,228 | 41,198,594 |
| 2  | 89,372,950  | 89,373,241  | 17 | 40,518,095 | 40,570,184 |
| 2  | 88,509,933  | 88,510,965  | 17 | 40,881,156 | 40,881,579 |
| 2  | 113,133,014 | 113,133,564 | 17 | 39,734,900 | 39,749,481 |
| 2  | 113,248,786 | 113,249,077 | 17 | 39,841,250 | 39,849,320 |
| 2  | 96,203,093  | 96,203,724  | 17 | 37,484,065 | 37,485,232 |
| 2  | 39,020,268  | 39,020,371  | 17 | 33,772,635 | 33,776,535 |
| 2  | 15,506,243  | 15,515,572  | 17 | 14,233,788 | 14,245,011 |
| 2  | 14,727,300  | 14,727,485  | 17 | 13,618,486 | 13,618,973 |
| 2  | 11,476,022  | 11,477,344  | 17 | 11,062,197 | 11,064,474 |
| 2  | 10,534,811  | 10,534,922  | 17 | 10,327,151 | 10,327,337 |
| 2  | 2,045,153   | 2,045,291   | 17 | 4,076,181  | 4,076,693  |
| 2  | 7,804,519   | 7,804,625   | 17 | 8,158,892  | 8,159,149  |
| 2  | 9,674,704   | 9,721,728   | 17 | 9,614,124  | 9,614,595  |
| 2  | 16,031,332  | 16,031,637  | 17 | 14,681,883 | 14,683,357 |
| 2  | 21,135,953  | 21,178,597  | 17 | 18,848,949 | 18,884,562 |
| 2  | 20,372,804  | 20,373,185  | 17 | 18,231,142 | 18,231,877 |
| 2  | 20,649,682  | 20,650,451  | 17 | 18,523,983 | 18,524,671 |
| 2  | 8,759,439   | 8,759,553   | 17 | 8,897,695  | 8,897,792  |
| 2  | 18,666,740  | 18,666,974  | 17 | 16,813,348 | 16,833,933 |
| 2  | 18,707,076  | 18,707,299  | 17 | 16,849,446 | 16,849,664 |
| 2  | 31,506,743  | 31,506,920  | 17 | 27,748,687 | 27,801,793 |
| 2  | 222,416,882 | 222,416,847 | 7  | 41,529,304 | 41,529,478 |
| 2  | 31,211,179  | 31,211,255  | 17 | 27,536,162 |            |

|    |                |        |     |          |                     |
|----|----------------|--------|-----|----------|---------------------|
| B1 | 39039612       | 0.0    | 3.2 | frame    |                     |
| B1 | LG33_D04       | 12.0   | 3.2 | frame    |                     |
| B1 | FCA014         | 33.1   | 2.0 | frame    |                     |
| B1 | MCFH1          | 45.0   | 2.0 | frame    |                     |
| B1 | 38967925       | 60.6   | 1.1 | frame    |                     |
| B1 | FCA803         | 70.0   | 1.1 | frame    |                     |
| B1 | FCA805         | 96.5   | 7.4 | frame    |                     |
| B1 | FCA804         | 103.9  | 7.4 | frame    |                     |
| B1 | LG25_D03       | 115.9  | 5.9 | frame    |                     |
| B1 | 38911554       | 125.3  | 5.9 | frame    |                     |
| B1 | FCA806         | 147.2  | 3.9 | frame    |                     |
| B1 | Fc.32922(CARF) | 161.1  | 6.8 | frame    |                     |
| B1 | SLC25A4        | 170.1  | 2.5 | frame    |                     |
| B1 | F11            | 179.0  | 2.5 | frame    |                     |
| B1 | FCA577         | 206.0  | 8.7 | frame    |                     |
| B1 | 39037958       | 210.4  | 3.2 | placed   |                     |
| B1 | F85            | 212.7  | 2.3 | placed   |                     |
| B1 | LG21_F09       | 224.5  | 7.1 | frame    |                     |
| B1 | FCA522         | 240.6  | 2.2 | frame    |                     |
| B1 | 38989990       | 254.7  | 2.2 | frame    |                     |
| B1 | LG26_C05       | 261.6  | 0.3 | placed   |                     |
| B1 | MGC8721        | 291.9  | 2.9 | frame    |                     |
| B1 | FCA807         | 345.7  | 1.5 | placed   |                     |
| B1 | FCA519         | 373.8  | 1.2 | placed   |                     |
| B1 | 39062576       | 397.8  | 4.7 | frame    |                     |
| B1 | 38994306       | 424.2  | 4.7 | frame    |                     |
| B1 | LPL            | 469.9  | 9.7 | frame    |                     |
| B1 | NAT2           | 497.1  | 6.3 | frame    |                     |
| B1 | FCA559         | 515.5  | 6.3 | frame    |                     |
| B1 | POLB           | 550.1  | 8.6 | placed   |                     |
| B1 | ADRB3          | 632.4  | 3.9 | frame    |                     |
| B1 | FCA039         | 643.8  | 3.9 | frame    |                     |
| B1 | FGFH1          | --     | --  | binlined | [FCA559 - 38974314] |
| B1 | 38974314       | 657.5  | 5.9 | frame    |                     |
| B1 | FCA023         | 664.3  | 5.9 | frame    |                     |
| B1 | CLU            | 666.5  | 2.8 | placed   |                     |
| B1 | FCA809         | 673.3  | 5.2 | frame    |                     |
| B1 | FCA811         | --     | --  | binlined | [FCA023 - FCA810]   |
| B1 | FCA810         | 682.7  | 5.1 | frame    |                     |
| B1 | 39036182       | 689.8  | 1.4 | frame    |                     |
| B1 | FCA812         | 697.0  | 1.4 | frame    |                     |
| B1 | 38989945       | 704.4  | 2.6 | placed   |                     |
| B1 | FCA700         | 716.7  | 5.2 | frame    |                     |
| B1 | FCA254         | 733.1  | 3.8 | frame    |                     |
| B1 | FCA813         | 754.6  | 3.8 | frame    |                     |
| B1 | FCA550         | 784.8  | 6.2 | frame    |                     |
| B1 | 38965928       | 802.5  | 4.4 | placed   |                     |
| B1 | FCA814         | 842.6  | 4.2 | frame    |                     |
| B1 | FCA815         | 852.3  | 4.2 | frame    |                     |
| B1 | FCA513         | 862.1  | 6.7 | frame    |                     |
| B1 | LG4_G09        | 890.4  | 6.0 | frame    |                     |
| B1 | LG4_F10        | 906.1  | 6.0 | frame    |                     |
| B1 | LG34_B09       | 906.5  | 4.1 | placed   |                     |
| B1 | 38967980       | 918.5  | 5.1 | placed   |                     |
| B1 | FCA816         | 926.5  | 4.6 | frame    |                     |
| B1 | FGG            | 936.1  | 4.6 | frame    |                     |
| B1 | NR3C2          | 948.0  | 7.0 | frame    |                     |
| B1 | KIAA1046       | 957.3  | 4.9 | frame    |                     |
| B1 | FCA818         | 964.4  | 4.9 | frame    |                     |
| B1 | LG23_E12       | --     | --  | binlined | [NR3C2 - FCA817]    |
| B1 | FCA817         | 974.3  | 8.8 | frame    |                     |
| B1 | LG34_F03       | 987.2  | 4.6 | frame    |                     |
| B1 | FCA819         | 999.8  | 4.6 | frame    |                     |
| B1 | IL15           | 1009.5 | 4.6 | frame    |                     |
| B1 | FCA564         | 1019.1 | 2.3 | frame    |                     |
| B1 | NM_004362      | 1031.3 | 2.3 | frame    |                     |
| B1 | 39038123       | 1049.4 | 3.8 | frame    |                     |
| B1 | LG34_B10       | 1062.2 | 3.8 | frame    |                     |
| B1 | FCA820         | 1089.5 | 5.7 | frame    |                     |
| B1 | IL2            | 1110.5 | 6.0 | frame    |                     |
| B1 | FCA821         | 1123.7 | 5.7 | frame    |                     |
| B1 | FCA822         | 1131.8 | 5.7 | frame    |                     |
| B1 | LG7_E01        | 1134.5 | 1.4 | placed   |                     |
| B1 | FCA126         | 1159.4 | 0.4 | placed   |                     |
| B1 | FCA212         | 1233.1 | 6.1 | frame    |                     |
| B1 | NM_016648      | 1190.9 | 2.6 | placed   |                     |
| B1 | LG22_E11       | 1199.7 | 5.0 | frame    |                     |
| B1 | EGF            | 1208.0 | 2.6 | frame    |                     |
| B1 | LG_20_34       | 1216.0 | 2.6 | frame    |                     |
| B1 | FCA074         | 1233.1 | 6.1 | frame    |                     |
| B1 | LG3_D09        | --     | --  | binlined | [FCA074 - LG34_C07] |
| B1 | SD6-306        | 1253.6 | 6.6 | frame    |                     |
| B1 | LG34_C07       | 1268.1 | 2.0 | frame    |                     |
| B1 | FCA812         | 1276.7 | 2.0 | frame    |                     |
| B1 | PKD2           | 1311.0 | 2.1 | frame    |                     |
| B1 | ODF1           | 1321.4 | 2.1 | placed   |                     |
| B1 | MLT2           | 1326.6 | 2.1 | frame    |                     |
| B1 | LG23_C06       | 1344.0 | 6.4 | frame    |                     |
| B1 | FCA824         | 1396.2 | 5.5 | frame    |                     |
| B1 | NM_012297      | 1372.0 | 1.8 | frame    |                     |
| B1 | 39085105       | 1387.2 | 3.0 | frame    |                     |
| B1 | FCA825         | 1399.2 | 3.0 | frame    |                     |
| B1 | IL8            | --     | --  | binlined | [FCA824 - ALB]      |
| B1 | ALB            | 1438.6 | 1.9 | frame    |                     |
| B1 | CSN2           | 1455.2 | 1.9 | frame    |                     |
| B1 | FCA823         | 1476.2 | 2.2 | frame    |                     |
| B1 | FCA097         | 1476.2 | 2.2 | frame    |                     |
| B1 | 39095403       | 1488.3 | 2.2 | frame    |                     |
| B1 | FCA257         | 1497.1 | 2.2 | frame    |                     |
| B1 | FCA827         | 1542.9 | 0.6 | placed   |                     |
| B1 | FCA149         | 1573.3 | 0.8 | placed   |                     |
| B1 | 39060629       | 1579.2 | 1.9 | frame    |                     |
| B1 | NM_145048      | 1588.0 | 1.9 | frame    |                     |
| B1 | FCA826         | --     | --  | binlined | [FCA257 - FLJ20425] |
| B1 | KIT            | 1616.8 | 0.9 | placed   |                     |
| B1 | FLJ20425       | 1694.1 | 3.2 | frame    |                     |
| B1 | FCA828         | 1725.7 | 1.3 | placed   |                     |
| B1 | FCA152         | 1731.7 | 4.3 | frame    |                     |
| B1 | 39006210       | 1746.8 | 4.8 | frame    |                     |
| B1 | 39029009       | 1764.3 | 4.0 | frame    |                     |
| B1 | FCA730         | 1781.0 | 4.0 | frame    |                     |
| B1 | FCA829         | 1799.8 | 2.5 | placed   |                     |
| B1 | Fc.25119       | 1821.3 | 4.6 | frame    |                     |
| B1 | FCA528         | 1831.9 | 4.6 | frame    |                     |
| B1 | 38995660       | 1851.9 | 2.3 | placed   |                     |
| B1 | FCA830         | 1854.5 | 1.8 | frame    |                     |
| B1 | FCA831         | 1863.0 | 1.8 | frame    |                     |
| B1 | FCA832         | 1865.4 | 7.0 | frame    |                     |
| B1 | LG8_C01        | 1911.4 | 1.5 | frame    |                     |
| B1 | MYL5           | 1926.0 | 1.5 | frame    |                     |

|    |             |             |    |            |            |
|----|-------------|-------------|----|------------|------------|
| 8  | 3,129,078   | 3,129,278   | 16 | 59,302,177 | 59,302,392 |
| 8  | 4,515,436   | 4,517,128   | 16 | 58,014,660 | 58,016,933 |
| 8  | 8,493,470   | 8,493,536   | 16 | 37,745,441 | 37,745,730 |
| 8  | 6,278,878   | 6,489,214   | 16 | 56,274,963 | 56,422,915 |
| 8  | 6,656,932   | 6,657,040   | 16 | 55,880,111 | 55,879,964 |
| 4  | 188,323,478 | 188,323,581 | 16 | 45,459,013 | 45,459,055 |
| 4  | 178,827,755 | 178,866,091 | 16 | 52,900,929 | 52,901,095 |
| 4  | 182,319,627 | 182,319,710 | 16 | 50,673,342 | 50,673,617 |
| 4  | 183,870,922 | 183,871,505 | 16 | 49,254,446 | 49,255,242 |
| 4  | 183,470,974 | 183,471,061 | 16 | 49,614,841 | 49,614,606 |
| 4  | 185,517,839 | 185,585,648 | 16 | 47,797,568 | 47,797,839 |
| 4  | 184,740,938 | 184,744,495 | 16 | 48,499,496 | 48,502,806 |
| 4  | 186,439,571 | 186,443,575 | 16 | 47,052,087 | 47,055,940 |
| 4  | 187,562,556 | 187,585,083 | 16 | 46,065,264 | 46,062,644 |
| 4  | 189,435,746 | 189,443,798 | 16 | 44,096,721 | 44,097,524 |
| 8  | 17,350,685  | 17,350,861  | 16 | 42,300,902 | 42,391,221 |
| 8  | 16,858,994  | 16,859,448  | 16 | 41,929,730 | 41,930,200 |
| 8  | 14,206,463  | 14,206,838  | 16 | 39,490,495 | 39,492,786 |
| 8  | 12,888,556  | 12,888,627  | 16 | 38,303,010 | 38,303,432 |
| 8  | 8,223,052   | 8,223,243   | 16 | 37,954,980 | 37,954,843 |
| 8  | 8,550,916   | 8,552,323   | 16 | 37,696,427 | 37,698,512 |
| 8  | 30,040,206  | 30,040,459  | 16 | 36,071,703 | 36,072,165 |
| 8  | 25,142,114  | 25,142,633  | 25 | 35,246,043 | 35,246,308 |
| 8  | 32,537,942  | 32,538,155  | 16 | 33,756,880 | 33,757,165 |
| 8  | 25,883,909  | 25,884,078  | 25 | 34,581,153 | 34,581,322 |
| 8  | 22,325,114  | 22,325,681  | 25 | 37,894,224 | 37,894,574 |
| 8  | 19,857,630  | 19,857,874  | 25 | 40,120,701 | 40,134,354 |
| 8  | 18,123,864  | 18,124,584  |    |            |            |
| 8  | 19,546,837  | 19,547,013  | 16 | 24,284,025 | 24,284,271 |
| 8  | 42,315,333  | 42,315,395  | 16 | 25,184,871 | 25,185,212 |
| 8  | 36,880,881  | 36,884,281  | 16 | 29,293,825 | 29,295,735 |
| 8  | 38,389,151  | 38,445,490  | 16 | 28,911,929 | 28,925,693 |
| 8  | 35,416,397  | 35,416,591  | 16 | 31,393,609 | 31,393,405 |
| 8  | 31,307,618  | 31,308,078  | 16 | 31,605,132 | 31,630,344 |
| 8  | 27,518,407  | 27,518,704  | 25 | 33,011,976 | 33,025,076 |
| 8  | 27,646,753  | 27,686,089  | 25 | 32,903,062 | 32,903,362 |
| 8  | 27,433,308  | 27,435,370  | 25 | 33,100,445 | 33,104,877 |
| 8  | 9,798,266   | 9,801,644   | 25 | 31,162,081 | 31,162,715 |
| 8  | 10,751,843  | 10,752,100  | 25 | 30,079,373 | 30,080,160 |
| 8  | 11,412,399  | 11,412,444  | 25 | 29,398,853 | 29,399,186 |
| 4  | 176,271,650 | 176,271,850 | 25 | 28,521,062 | 28,520,822 |
| 4  | 175,106,000 | 175,106,041 | 25 | 27,386,148 | 27,386,444 |
| 4  | 176,007,720 | 176,007,720 | 25 | 29,134,350 | 29,134,012 |
| 8  | 11,442,957  | 11,459,026  | 25 | 29,465,868 | 29,466,007 |
| 4  | 172,502,264 | 172,503,386 | 25 | 25,289,644 | 25,291,717 |
| 4  | 170,013,651 | 170,014,103 | 25 | 22,351,562 | 22,351,855 |
| 4  | 162,662,655 | 163,442,723 | 15 | 60,701,111 | 60,701,388 |
| 4  | 162,339,558 | 162,341,776 | 15 | 60,934,362 | 60,939,871 |
| 20 | 24,429,343  | 24,429,879  | 23 | 3,718,547  | 3,720,685  |
| 4  | 157,585,345 | 157,585,882 | 15 | 56,760,924 | 56,761,539 |
| 4  | 154,726,855 | 154,727,435 | 15 | 54,282,567 | 54,283,146 |
| 4  | 152,442,173 | 152,442,265 | 15 | 52,134,350 | 52,134,012 |
| 4  | 155,165,332 | 155,165,595 | 15 | 54,652,537 | 54,652,783 |
| 4  | 155,888,357 | 155,888,478 | 15 | 55,296,939 | 55,297,220 |
| 4  | 149,357,525 | 149,721,128 | 19 | 49,408,306 | 49,737,091 |
| 4  | 146,437,894 | 146,456,353 | 15 | 46,829,635 | 46,835,068 |
| 4  | 145,775,980 | 145,775,980 | 15 | 46,299,026 | 46,299,309 |
| 4  | 145,648,586 | 145,648,962 | 15 | 46,214,893 | 46,215,294 |
| 4  | 145,925,238 | 146,016,800 | 15 | 46,468,644 | 46,468,924 |
| 7  | 68,575,056  | 68,580,623  | 6  | 6,541,949  | 6,547,508  |
| 4  | 142,798,334 | 142,806,229 | 19 | 4,488,887  | 4,498,898  |
| 4  | 143,011,511 | 143,011,606 | 19 | 4,398,441  | 4,349,482  |
| 4  | 141,191,060 | 141,191,169 | 19 | 5,871,143  | 5,871,252  |
| 4  | 141,667,523 | 141,667,756 | 19 | 5,397,440  | 5,446,048  |
| 4  | 136,896,850 | 136,896,995 | 19 | 9,629,756  | 9,629,945  |
| 4  | 135,664,232 | 135,668,555 | 19 | 10,706,490 | 10,708,882 |
| 4  | 130,381,371 | 130,390,539 | 19 | 14,468,576 | 14,468,831 |
| 4  | 123,730,515 | 123,730,624 | 19 | 20,770,916 | 20,775,878 |
| 4  | 121,734,058 | 121,735,272 | 19 | 22,527,870 | 22,528,078 |
| 4  | 119,560,694 | 119,631,513 | 32 | 40,543,124 | 40,543,220 |
| 4  | 118,340,334 | 118,340,770 | 32 | 39,490,562 | 39,491,022 |
| 4  | 121,107,794 | 121,128,782 | 32 | 41,586,604 | 41,625,781 |
| 4  | 114,988,331 | 115,004,380 | 32 | 36,445,967 | 36,545,684 |
| 4  | 113,929,226 | 113,929,339 | 32 | 35,443,664 | 35,455,004 |
| 4  | 110,019,467 | 110,020,580 | 32 | 32,086,876 | 32,087,297 |
| 4  | 111,254,774 | 111,254,997 | 32 | 33,086,853 | 33,179,102 |
| 4  | 110,768,810 | 110,769,337 | 32 | 32,737,286 | 32,738,128 |
| 4  | 108,202,581 | 108,311,653 | 32 | 30,534,399 | 30,534,642 |
| 4  | 106,204,929 | 106,205,176 | 32 | 28,899,553 | 28,899,795 |
| 4  | 106,665,331 | 106,665,399 | 32 | 29,248,177 | 29,264,752 |
| 4  | 103,228,270 | 103,228,620 | 32 | 26,495,400 | 26,495,882 |
| 4  |             |             |    |            |            |

|    |           |        |      |        |                     |
|----|-----------|--------|------|--------|---------------------|
| B2 | FCA833    | 0.0    | 6.3  | frame  |                     |
| B2 | BTN1A1    | 11.7   | 2.2  | frame  |                     |
| B2 | MOC       | 18.5   | 2.0  | placed |                     |
| B2 | 3908326f1 | 25.3   | 0.4  | placed |                     |
| B2 | GPX5      | 27.5   | 2.2  | frame  |                     |
| B2 | TRIM26    | 34.4   | 0.4  | placed |                     |
| B2 | FCA275    | 53.7   | 5.7  | frame  |                     |
| B2 | FCA834    | 58.2   | 3.6  | placed |                     |
| B2 | PRL       | 60.4   | 4.8  | frame  |                     |
| B2 | FCA835    | 69.6   | 4.8  | frame  |                     |
| B2 | FCA305    | 81.1   | 7.5  | frame  |                     |
| B2 | EDN1      | 94.9   | 9.4  | frame  |                     |
| B2 | FCA836    | 122.1  | 5.3  | frame  |                     |
| B2 | LG21_C12  | 136.1  | 3.4  | frame  |                     |
| B2 | FCA837    | 150.4  | 3.4  | frame  |                     |
| B2 | F13A      | 162.1  | 4.5  | frame  |                     |
| B2 | PRP4      | 182.0  | 10.7 | frame  |                     |
| B2 | LG31_E10  | 218.2  | 9.5  | frame  |                     |
| B2 | MKFX      | 257.4  | 9.5  | frame  |                     |
| B2 | TRIM39    | 294.1  | 6.4  | frame  |                     |
| B2 | 16FLA     | 294.1  | 6.4  | frame  |                     |
| B2 | ASYN      | 297.0  | 2.2  | placed |                     |
| B2 | FLA2      | 314.9  | 0.4  | placed |                     |
| B2 | FLA1      | 320.3  | 5.2  | frame  |                     |
| B2 | TNFA      | 328.7  | 5.2  | frame  |                     |
| B2 | CSNK2B    | 334.1  | 1.6  | placed |                     |
| B2 | C4A       | 336.7  | 7.4  | frame  |                     |
| B2 | TSBP      | 349.9  | 8.2  | frame  |                     |
| B2 | 16B21     | 369.0  | 1.4  | placed |                     |
| B2 | DRA       | 371.5  | 2.2  | frame  |                     |
| B2 | FCA838    | 379.0  | 2.2  | frame  |                     |
| B2 | DOB       | --     | --   | binned | [DRA - RPS18]       |
| B2 | DPA       | 383.8  | 5.2  | placed |                     |
| B2 | RPS18     | 393.7  | 6.6  | frame  |                     |
| B2 | MLN       | 410.8  | 6.6  | frame  |                     |
| B2 | TCP11     | 435.6  | 1.8  | placed |                     |
| B2 | FCA053    | 437.8  | 5.2  | frame  |                     |
| B2 | CDKN1A    | 454.2  | 5.2  | frame  |                     |
| B2 | PIM1      | 473.2  | 3.5  | frame  |                     |
| B2 | 38988454  | 482.3  | 3.5  | frame  |                     |
| B2 | LG22_H09  | 503.8  | 1.5  | frame  |                     |
| B2 | FCA839    | 512.9  | 1.5  | frame  |                     |
| B2 | RDS       | 534.7  | 6.2  | frame  |                     |
| B2 | CDCL      | 553.7  | 6.2  | frame  |                     |
| B2 | COL9A1    | --     | --   | binned | [CDCL - 39037933]   |
| B2 | 39006193  | 595.4  | 3.1  | placed |                     |
| B2 | 39010221  | 633.7  | 6.2  | frame  |                     |
| B2 | 39039010  | 648.2  | 4.3  | placed |                     |
| B2 | 39041811  | 689.6  | 0.4  | placed |                     |
| B2 | 39037933  | 762.0  | 5.5  | frame  |                     |
| B2 | EEF1A1    | 827.2  | 3.2  | placed |                     |
| B2 | FCA840    | 864.1  | 5.6  | frame  |                     |
| B2 | LG_17_12  | 882.0  | 5.6  | frame  |                     |
| B2 | ME1       | 884.4  | 2.2  | placed |                     |
| B2 | FCA841    | 899.7  | 8.5  | frame  |                     |
| B2 | CGA       | 925.7  | 8.5  | frame  |                     |
| B2 | b5+b5R    | 950.9  | 0.2  | placed |                     |
| B2 | CNR1      | 970.8  | 5.0  | placed |                     |
| B2 | 39012476  | 978.0  | 4.8  | placed |                     |
| B2 | 39007558  | 993.5  | 6.2  | frame  |                     |
| B2 | FCA846    | 1003.4 | 6.2  | frame  |                     |
| B2 | FCA847    | 1013.4 | 6.4  | frame  |                     |
| B2 | FCA732    | 1015.7 | 2.2  | placed |                     |
| B2 | RD114-6F  | 1038.7 | 3.7  | frame  |                     |
| B2 | LG31_G12  | 1053.8 | 9.7  | frame  |                     |
| B2 | FCA733    | 1072.0 | 3.3  | frame  |                     |
| B2 | POU3F2    | 1084.5 | 3.3  | frame  |                     |
| B2 | FCA680    | 1096.7 | 6.9  | frame  |                     |
| B2 | CD164     | 1119.1 | 6.4  | frame  |                     |
| B2 | 39064331  | 1154.3 | 8.0  | frame  |                     |
| B2 | FCA845    | 1167.0 | 7.2  | frame  |                     |
| B2 | 39049098  | 1174.6 | 6.6  | frame  |                     |
| B2 | FCA133    | 1182.2 | 6.6  | frame  |                     |
| B2 | LG_19_6f1 | 1189.9 | 0.4  | placed |                     |
| B2 | FCA844    | 1215.4 | 5.2  | frame  |                     |
| B2 | RPS12     | --     | --   | binned | [FCA133 - 38974525] |
| B2 | 38974525  | 1240.3 | 4.0  | frame  |                     |
| B2 | EPB41L2   | 1263.0 | 4.0  | frame  |                     |
| B2 | LG24_D07  | 1286.1 | 2.7  | placed |                     |
| B2 | FCA843    | 1309.6 | 0.2  | placed |                     |
| B2 | LG_19_6f7 | 1315.0 | 4.1  | frame  |                     |
| B2 | 39038466  | 1328.8 | 4.1  | frame  |                     |
| B2 | 39036207  | 1367.2 | 7.7  | frame  |                     |
| B2 | ESR1      | 1396.4 | 6.7  | frame  |                     |
| B2 | 39063854  | 1419.4 | 4.1  | frame  |                     |
| B2 | TCP1      | 1429.2 | 4.1  | frame  |                     |
| B2 | OKI       | 1439.3 | 2.5  | placed |                     |
| B2 | FCA842    | 1441.7 | 3.4  | frame  |                     |
| B2 | 38987989  | 1454.5 | 3.1  | frame  |                     |
| B2 | TBP       | 1469.7 | 3.1  | frame  |                     |

|   |             |             |    |            |            |
|---|-------------|-------------|----|------------|------------|
| 6 | 26,045,493  | 26,048,650  | 35 | 26,841,637 | 26,844,270 |
| 6 | 26,616,950  | 26,617,173  | 35 | 27,267,344 | 27,267,582 |
| 6 | 29,732,847  | 29,748,076  | 35 | 29,239,124 | 29,249,502 |
| 6 | 28,332,285  | 28,335,534  | 35 | 29,377,545 | 29,379,756 |
| 6 | 28,601,768  | 28,609,923  | 35 | 28,637,380 | 28,642,391 |
| 6 | 30,260,210  | 30,289,104  | 35 | 29,370,304 | 29,378,070 |
| 6 | 22,677,807  | 22,797,072  | 35 | 23,874,259 | 23,874,354 |
| 6 | 22,677,807  | 22,797,072  | 35 | 24,002,944 | 24,003,438 |
| 6 | 22,395,563  | 22,395,784  | 35 | 23,646,350 | 23,656,327 |
| 6 | 19,078,866  | 19,079,207  | 35 | 20,650,822 | 20,651,034 |
| 6 | 18,208,716  | 18,208,850  | 35 | 19,880,540 | 19,880,707 |
| 6 | 12,400,601  | 12,400,729  | 35 | 14,771,537 | 14,772,787 |
| 6 | 8,025,648   | 8,025,711   | 35 | 10,968,237 | 10,970,409 |
| 6 | 6,738,266   | 6,738,636   | 35 | 9,791,648  | 9,792,210  |
| 6 | 5,935,971   | 5,936,060   | 35 | 9,016,774  | 9,016,855  |
| 6 | 6,211,825   | 6,211,973   | 35 | 9,253,261  | 9,253,423  |
| 6 | 3,966,595   | 4,010,215   | 35 | 7,260,877  | 7,261,018  |
| 6 | 2,504,571   | 2,505,012   | 35 | 5,852,505  | 5,852,892  |
| 6 | 237,097     | 296,353     | 35 | 3,621,229  | 3,675,686  |
| 6 | 30,403,019  | 30,419,484  | 12 | 3,239,482  | 3,252,813  |
| 6 | 29,974,561  | 30,004,707  | 12 | 3,816,028  | 3,818,666  |
| 6 | 30,019,896  | 30,020,153  | 12 | 3,856,704  | 3,859,276  |
| 6 | 31,652,870  | 31,653,293  | 12 | 3,998,041  | 3,999,753  |
| 6 | 31,745,554  | 31,750,368  | 12 | 4,077,075  | 4,077,985  |
| 6 | 32,057,813  | 32,111,173  | 12 | 4,367,374  | 4,367,738  |
| 6 | 32,368,465  | 32,448,183  | 12 | 4,748,934  | 4,841,093  |
| 6 | 32,516,372  | 32,523,494  | 12 | 5,054,037  | 5,057,603  |
| 6 | 32,888,527  | 32,892,803  | 12 | 5,299,085  | 5,303,675  |
| 6 | 33,140,771  | 33,149,356  | 12 | 5,526,673  | 5,527,926  |
| 6 | 33,392,485  | 33,393,484  | 12 | 5,653,684  | 5,658,843  |
| 6 | 33,870,427  | 33,879,771  | 12 | 6,057,634  | 6,064,252  |
| 6 | 35,193,989  | 35,194,250  | 12 | 7,209,098  | 7,209,512  |
| 6 | 36,759,896  | 36,760,301  | 12 | 8,678,639  | 8,680,779  |
| 6 | 37,246,561  | 37,246,650  | 12 | 9,140,309  | 9,141,146  |
| 6 | 38,317,903  | 38,317,966  | 12 | 10,139,952 | 10,140,233 |
| 6 | 41,123,780  | 41,125,994  | 12 | 12,733,012 | 12,735,299 |
| 6 | 41,124,204  | 41,124,462  | 12 | 12,735,739 | 12,735,989 |
| 6 | 42,797,470  | 42,798,056  | 12 | 14,229,047 | 14,244,422 |
| 6 | 44,522,320  | 44,522,658  | 12 | 15,750,161 | 15,751,331 |
| 6 | 71,066,497  | 71,068,689  | 12 | 35,773,573 | 35,773,814 |
| 6 | 47,034,336  | 47,034,468  | 12 | 18,055,228 | 18,055,274 |
| 6 | 65,263,973  | 65,264,054  | 12 | 30,760,043 | 30,759,786 |
| 6 | 56,329,285  | 56,329,563  | 12 | 26,549,064 | 26,549,532 |
| 6 | 76,445,235  | 76,445,377  | 12 | 40,240,618 | 40,240,829 |
| 6 | 53,637,682  | 53,637,682  | 12 | 24,113,860 | 24,113,326 |
| 6 | 74,281,146  | 74,287,476  | 12 | 38,509,627 | 38,512,060 |
| 6 | 80,719,439  | 80,720,519  | 12 | 44,852,617 | 44,854,676 |
| 6 | 82,995,948  | 82,997,228  | 12 | 45,684,435 | 45,684,550 |
| 6 | 83,978,076  | 84,197,499  | 12 | 46,560,015 | 46,720,867 |
| 6 | 88,017,343  | 88,017,543  | 12 | 49,702,054 | 49,702,186 |
| 6 | 87,861,672  | 87,861,801  | 12 | 49,561,292 | 49,561,483 |
| 6 | 84,726,405  | 84,726,777  | 12 | 47,179,014 | 47,179,395 |
| 6 | 88,910,294  | 88,911,712  | 12 | 50,473,016 | 50,474,418 |
| 6 | 89,325,689  | 89,325,848  | 12 | 50,830,636 | 50,830,792 |
| 6 | 91,538,805  | 91,538,971  | 12 | 52,889,273 | 52,888,977 |
| 6 | 92,246,325  | 92,246,622  | 12 | 53,530,634 | 53,530,925 |
| 6 | 94,161,823  | 94,162,223  | 12 | 55,207,899 | 55,208,298 |
| 6 | 94,663,634  | 94,664,001  | 12 | 55,629,469 | 55,629,842 |
| 6 | 96,613,853  | 96,614,303  | 12 | 57,550,272 | 57,550,782 |
| 6 | 99,890,488  | 99,891,018  | 12 | 60,477,581 | 60,477,950 |
| 6 | 99,389,319  | 99,391,256  | 12 | 60,024,320 | 60,028,212 |
| 6 | 106,661,471 | 106,662,069 | 12 | 66,436,241 | 66,436,321 |
| 6 | 109,794,413 | 109,794,675 | 12 | 69,271,338 | 69,271,877 |
| 6 | 118,298,265 | 118,298,374 | 1  | 60,983,950 | 60,983,517 |
| 6 | 124,012,866 | 124,012,933 | 1  | 65,785,241 | 65,785,648 |
| 6 | 125,559,096 | 125,559,251 | 1  | 67,169,809 | 67,170,332 |
| 6 | 126,557,241 | 126,559,526 | 1  | 68,060,581 | 68,060,861 |
| 6 | 130,073,646 | 130,074,380 | 1  | 71,278,136 | 71,278,535 |
| 6 | 136,945,178 | 136,945,358 | 1  | 32,115,817 | 32,116,262 |
| 6 | 133,177,401 | 133,185,594 | 1  | 23,815,809 | 23,817,253 |
| 6 | 145,778,297 | 145,778,513 | 1  | 39,690,778 | 39,691,047 |
| 6 | 131,202,183 | 131,319,333 | 1  | 72,138,140 | 72,240,284 |
| 6 | 142,898,876 | 142,906,957 | 1  | 37,169,355 | 37,170,468 |
| 6 | 144,785,952 | 145,203,667 | 1  | 39,575,300 | 39,575,807 |
| 6 | 143,417,429 | 143,417,827 | 1  | 37,634,121 | 37,634,484 |
| 6 | 140,288,943 | 140,289,211 | 1  | 34,980,144 | 34,979,836 |
| 6 | 149,334,312 | 149,334,428 | 1  | 42,826,848 | 42,826,718 |
| 6 | 152,221,189 | 152,221,589 | 1  | 45,091,039 | 45,091,451 |
| 6 | 156,094,863 | 156,095,161 | 1  | 48,409,026 | 48,408,805 |
| 6 | 160,169,942 | 160,181,134 | 1  | 51,922,976 | 52,043,846 |
| 6 | 163,954,863 | 163,955,164 | 1  | 54,807,842 | 54,963,152 |
| 6 | 164,116,341 | 164,116,386 | 1  | 55,109,049 | 55,109,513 |
| 6 | 166,914,878 | 166,914,988 | 1  | 57,509,785 | 57,509,468 |
| 6 | 170,781,053 | 170,799,576 | 12 | 75,436,019 | 75,436,246 |

|    |            |        |     |        |                      |
|----|------------|--------|-----|--------|----------------------|
| BS | DNAJ4      | 0.0    | 2.2 | frame  |                      |
| BS | IL16       | 13.9   | 2.2 | frame  |                      |
| BS | 39012261   | 30.7   | 2.4 | frame  |                      |
| BS | BTBD1      | 37.7   | 2.4 | frame  |                      |
| BS | FES        | 47.1   | 3.9 | frame  |                      |
| BS | CIB1       | 59.2   | 4.3 | frame  |                      |
| BS | LG23_D02   | 66.0   | 4.3 | frame  |                      |
| BS | ANPEP      | 85.1   | 4.9 | frame  |                      |
| BS | LG_17_19   | 119.0  | 1.4 | frame  |                      |
| BS | FCA848     | 124.8  | 1.4 | frame  |                      |
| BS | FCA849     | 139.0  | 4.1 | frame  |                      |
| BS | 38968055   | 150.9  | 4.1 | frame  |                      |
| BS | 39052140   | 160.3  | 6.5 | placed |                      |
| BS | IGF1R      | 174.8  | 6.0 | frame  |                      |
| BS | 38988372   | 183.3  | 2.4 | frame  |                      |
| BS | MEF2A      | 190.6  | 2.4 | frame  |                      |
| BS | 39018125   | 204.5  | 4.3 | frame  |                      |
| BS | TJP1       | 216.1  | 4.3 | frame  |                      |
| BS | LG9_10_A05 | 232.8  | 1.2 | frame  |                      |
| BS | 38995700   | 237.3  | 1.3 | placed |                      |
| BS | FCA349     | 246.6  | 1.2 | frame  |                      |
| BS | 39078566   | 282.8  | 8.9 | frame  |                      |
| BS | TSPAN-3    | 366.5  | 1.6 | frame  |                      |
| BS | CYP1A1     | 396.4  | 1.6 | frame  |                      |
| BS | 39029376   | 420.6  | 6.6 | frame  |                      |
| BS | FCA205     | 436.8  | 2.1 | frame  |                      |
| BS | FCA660     | 450.8  | 2.1 | frame  |                      |
| BS | RPLP1      | 467.2  | 4.3 | frame  |                      |
| BS | LG25_C03   | 481.3  | 4.8 | frame  |                      |
| BS | 39078501   | --     | --  | binmed | [RPLP1 - LG22_F08]   |
| BS | LG22_F08   | 497.9  | 7.7 | frame  |                      |
| BS | TPM1       | 522.0  | 1.8 | frame  |                      |
| BS | PSFL       | 531.0  | 1.8 | frame  |                      |
| BS | FCA201     | 552.9  | 3.0 | frame  |                      |
| BS | FCA850     | 568.6  | 3.0 | frame  |                      |
| BS | B2M        | 610.6  | 2.5 | frame  |                      |
| BS | 39005843   | 610.6  | 2.5 | frame  |                      |
| BS | 38988883   | 620.4  | 2.5 | frame  |                      |
| BS | CYP19      | 630.1  | 2.7 | frame  |                      |
| BS | KIAA0256   | 655.8  | 9.9 | frame  |                      |
| BS | TYR3       | 678.0  | 2.6 | frame  |                      |
| BS | LG5_D11M   | 697.6  | 2.6 | frame  |                      |
| BS | 39006039   | 714.9  | 3.3 | frame  |                      |
| BS | THBS1      | 722.0  | 3.3 | frame  |                      |
| BS | CHP        | 731.6  | 4.7 | frame  |                      |
| BS | FCA391     | 731.6  | 4.7 | frame  |                      |
| BS | 39012549   | 744.3  | 4.7 | frame  |                      |
| BS | ACTC       | 771.0  | 4.1 | frame  |                      |
| BS | CMA1       | 791.3  | 4.0 | frame  |                      |
| BS | PABPN      | 803.3  | 3.7 | frame  |                      |
| BS | PNN        | 807.9  | 2.3 | placed |                      |
| BS | OXA1L      | 814.9  | 2.8 | frame  |                      |
| BS | NRL        | 819.6  | 2.9 | placed |                      |
| BS | MYH6       | 821.9  | 2.8 | frame  |                      |
| BS | MYH7       | 821.9  | 2.8 | frame  |                      |
| BS | FCA013     | --     | --  | binmed | [MYH6 - APEX]        |
| BS | DAD1       | 829.1  | 2.8 | frame  |                      |
| BS | TRA@       | --     | --  | binmed | [DAD1 - NDRG2]       |
| BS | APEX       | 836.3  | 2.8 | frame  |                      |
| BS | NDRG2      | 843.4  | 4.0 | frame  |                      |
| BS | TRD@       | --     | --  | binmed | [APEX - LG9-16_H02]  |
| BS | LG9-16_H02 | 866.8  | 1.9 | frame  |                      |
| BS | HNF3A      | 879.0  | 1.9 | frame  |                      |
| BS | PYGL       | 898.9  | 4.7 | frame  |                      |
| BS | FCA851     | 934.4  | 1.4 | placed |                      |
| BS | 39095388   | 960.7  | 2.2 | frame  |                      |
| BS | 39005350   | 975.8  | 2.2 | frame  |                      |
| BS | FCA230     | 980.5  | 3.5 | placed |                      |
| BS | FCA852     | 987.9  | 6.3 | frame  |                      |
| BS | LG34_B08   | 1000.5 | 6.6 | frame  |                      |
| BS | 39011560   | 1010.1 | 4.8 | frame  |                      |
| BS | ESR2       | 1022.3 | 4.8 | frame  |                      |
| BS | FCA855     | --     | --  | binmed | [ESR2 - 39060260]    |
| BS | LG_20.2    | 1037.1 | 0.2 | placed |                      |
| BS | FOS        | 1037.1 | 0.2 | placed |                      |
| BS | MAX        | 1041.7 | 2.2 | frame  |                      |
| BS | MPP5       | 1048.8 | 2.2 | frame  |                      |
| BS | KIAA0759   | --     | --  | binmed | [MPP5 - RD114-8D]    |
| BS | ATP6V1D    | 1051.0 | 0.1 | placed |                      |
| BS | 39060260   | 1063.2 | 2.5 | frame  |                      |
| BS | FCA734     | --     | --  | binmed | [MPP5 - RD114-8D]    |
| BS | RD114-8D   | 1072.9 | 2.2 | frame  |                      |
| BS | FCA592     | 1082.5 | 2.2 | frame  |                      |
| BS | FCA856     | 1097.5 | 5.7 | frame  |                      |
| BS | TSHR       | 1112.4 | 4.5 | frame  |                      |
| BS | LG7_B11    | 1119.5 | 2.8 | frame  |                      |
| BS | RD114-8A   | 1126.6 | 2.8 | frame  |                      |
| BS | RD114-8E   | --     | --  | binmed | [LG7_B11 - 39010548] |
| BS | RD114-8F   | --     | --  | binmed | [LG7_B11 - 39010548] |
| BS | FCA088     | --     | --  | binmed | [FCA856 - 39010548]  |
| BS | 39010548   | 1133.7 | 5.2 | frame  |                      |
| BS | 39161002   | 1140.9 | 4.0 | frame  |                      |
| BS | ITPK1      | 1148.2 | 4.0 | frame  |                      |
| BS | 39060197   | 1153.0 | 1.9 | placed |                      |
| BS | WARS       | 1183.3 | 0.8 | frame  |                      |
| BS | FLJ22558   | 1193.1 | 0.8 | frame  |                      |
| BS | E1F5       | 1200.4 | 2.3 | frame  |                      |
| BS | IGHM       | 1221.5 | 6.7 | frame  |                      |

|    |             |             |    |            |            |
|----|-------------|-------------|----|------------|------------|
| 15 | 76,349,891  | 76,350,074  | 3  | 61,368,032 | 61,362,571 |
| 15 | 79,388,003  | 79,388,194  | 3  | 59,432,831 | 59,435,377 |
| 15 | 83,256,572  | 83,256,641  | 3  | 57,112,187 | 57,112,439 |
| 15 | 81,477,500  | 81,477,577  | 3  | 57,753,920 | 57,754,141 |
| 15 | 89,236,977  | 89,237,056  | 3  | 56,303,964 | 56,306,070 |
| 15 | 88,574,594  | 88,574,744  | 3  | 56,140,447 | 56,140,882 |
| 15 | 88,520,832  | 88,522,153  | 3  | 56,092,272 | 56,092,696 |
| 15 | 88,129,552  | 88,129,740  | 3  | 55,721,704 | 55,736,534 |
| 15 | 86,448,770  | 86,449,053  | 3  | 54,311,372 | 54,311,666 |
| 15 | 86,221,222  | 86,530,124  | 3  | 54,340,762 | 54,341,075 |
| 15 | 84,485,297  | 84,486,121  | 3  | 52,651,220 | 52,653,542 |
| 15 | 91,163,818  | 91,164,080  | 3  | 50,239,780 | 50,240,014 |
| 15 | 94,621,178  | 94,621,357  | 3  | 47,157,185 | 47,156,954 |
| 15 | 97,010,242  | 97,319,034  | 3  | 44,805,951 | 45,047,532 |
| 15 | 97,782,969  | 97,783,124  | 3  | 44,286,931 | 44,286,311 |
| 15 | 97,990,733  | 98,074,131  | 3  | 43,972,428 | 44,065,614 |
| 15 | 100,002,807 | 100,002,891 | 3  | 42,387,326 | 42,387,667 |
| 15 | 27,779,648  | 27,901,998  | 3  | 41,948,188 | 42,058,496 |
| 15 | 29,480,183  | 29,480,424  | 3  | 40,563,208 | 40,563,461 |
| 15 | 29,084,050  | 29,084,157  | 3  | 40,896,065 | 40,895,416 |
| 15 | 27,275,921  | 27,276,095  | 3  | 41,459,667 | 41,459,886 |
| 15 | 24,153,337  | 24,153,608  | 3  | 37,077,625 | 37,078,086 |
| 15 | 75,125,711  | 75,125,968  | 30 | 42,217,650 | 42,217,939 |
| 15 | 72,801,994  | 72,802,301  | 30 | 40,747,921 | 40,748,265 |
| 15 | 70,382,246  | 70,382,246  | 30 | 38,754,505 | 38,754,114 |
| 15 | 68,748,137  | 68,781,701  | 30 | 37,359,228 | 37,359,487 |
| 15 | 68,832,175  | 68,832,690  | 30 | 37,408,408 | 37,408,956 |
| 15 | 67,532,229  | 67,534,938  | 30 | 36,291,223 | 36,294,110 |
| 15 | 64,814,603  | 64,814,757  | 30 | 33,913,452 | 33,913,780 |
| 15 | 64,086,253  | 64,087,869  | 30 | 33,265,236 | 33,265,572 |
| 15 | 61,121,940  | 61,145,344  | 30 | 30,569,894 | 30,597,428 |
| 15 | 61,388,280  | 61,388,364  | 30 | 30,819,690 | 30,820,100 |
| 15 | 59,789,469  | 59,789,640  | 30 | 29,390,880 | 29,391,110 |
| 15 | 56,602,308  | 56,602,492  | 30 | 28,461,894 | 28,462,078 |
| 15 | 42,791,012  | 42,791,654  | 30 | 14,243,916 | 14,246,452 |
| 15 | 42,994,730  | 42,994,819  | 30 | 14,343,062 | 14,343,293 |
| 15 | 44,497,457  | 44,497,796  | 30 | 15,679,892 | 15,679,470 |
| 15 | 49,291,739  | 49,291,958  | 30 | 19,871,148 | 19,871,462 |
| 15 | 47,070,786  | 47,071,091  | 30 | 18,125,397 | 18,125,835 |
| 15 | 39,639,524  | 39,639,827  | 30 | 11,492,145 | 11,506,198 |
| 15 | 37,664,708  | 37,667,584  | 30 | 9,674,966  | 9,677,120  |
| 15 | 36,635,457  | 36,635,801  | 30 | 8,802,248  | 8,802,911  |
| 15 | 37,660,577  | 37,676,957  | 30 | 9,671,375  | 9,687,464  |
| 15 | 39,310,832  | 39,310,934  | 30 | 11,212,954 | 11,213,178 |
| 15 | 37,589,939  | 37,589,936  | 30 | 9,296,990  | 9,297,325  |
| 15 | 31,547,004  | 31,547,254  | 30 | 4,432,061  | 4,432,405  |
| 15 | 32,633,778  | 32,834,007  | 30 | 5,408,636  | 5,413,538  |
| 14 | 24,044,404  | 24,047,281  | 8  | 7,301,395  | 7,304,130  |
| 14 | 22,864,130  | 22,864,364  | 8  | 6,444,579  | 6,445,050  |
| 14 | 38,714,204  | 38,721,174  | 8  | 20,222,310 | 20,229,042 |
| 14 | 22,307,032  | 22,307,232  | 8  | 5,969,240  | 5,969,622  |
| 14 | 23,625,815  | 23,625,891  | 8  | 6,955,325  | 6,955,720  |
| 14 | 22,921,037  | 22,947,324  | 8  | 6,488,869  | 6,539,990  |
| 14 | 22,951,788  | 22,974,690  | 8  | 6,489,288  | 6,542,127  |
| 14 | 22,113,797  | 22,113,875  | 8  | 5,825,015  | 5,838,542  |
| 14 | 21,535,638  | 21,536,298  | 8  | 5,809,499  | 5,809,638  |
| 14 | 19,993,130  | 19,995,765  | 15 | 20,784,114 | 20,786,138 |
| 14 | 20,554,776  | 20,555,174  | 15 | 21,107,557 | 21,114,110 |
| 14 | 22,001,892  | 22,001,990  | 8  | 5,724,840  | 5,726,112  |
| 14 | 37,011,869  | 37,012,860  | 8  | 18,840,396 | 18,840,940 |
| 14 | 37,128,940  | 37,133,980  | 8  | 18,947,889 | 18,951,427 |
| 14 | 50,441,810  | 50,480,922  | 8  | 30,139,007 | 30,181,899 |
| 14 | 41,665,888  | 41,667,925  | 8  | 22,626,155 | 22,626,258 |
| 14 | 47,213,111  | 47,213,506  | 8  | 27,480,757 | 27,480,445 |
| 14 | 51,805,785  | 51,805,867  | 8  | 31,354,527 | 31,354,419 |
| 14 | 54,799,290  | 54,799,381  | 8  | 34,002,556 | 34,002,864 |
| 14 | 54,142,762  | 54,143,012  | 8  | 33,410,536 | 33,410,956 |
| 14 | 58,605,737  | 58,606,208  | 8  | 37,259,833 | 37,260,318 |
| 14 | 60,906,093  | 60,906,258  | 8  | 39,169,069 | 39,168,864 |
| 14 | 63,769,607  | 63,830,831  | 8  | 41,555,133 | 41,606,286 |
| 14 | 74,916,914  | 74,917,284  | 8  | 51,329,758 | 51,330,152 |
| 14 | 74,815,312  | 74,818,404  | 8  | 51,245,733 | 51,249,079 |
| 14 | 64,612,947  | 64,613,136  | 8  | 42,347,822 | 42,370,778 |
| 14 | 66,829,075  | 66,870,432  | 8  | 44,240,993 | 44,241,532 |
| 14 | 76,323,553  | 76,323,558  | 8  | 52,571,341 | 52,571,706 |
| 14 | 66,874,532  | 66,874,699  | 8  | 44,244,608 | 44,244,891 |
| 14 | 71,483,680  | 71,483,908  | 8  | 48,329,259 | 48,329,555 |
| 14 | 72,450,213  | 72,452,039  | 8  | 49,211,705 | 49,213,170 |
| 14 | 72,758,247  | 72,758,283  | 8  | 48,481,751 | 48,482,069 |
| 14 | 77,841,539  | 77,841,928  | 8  | 53,888,400 | 53,888,560 |
| 14 | 80,679,036  | 80,680,450  | 8  | 56,244,767 | 56,298,208 |
| 14 | 81,189,940  | 81,189,974  | 8  | 56,839,519 | 56,839,653 |
| 14 | 82,641,703  | 82,641,943  | 8  | 58,110,672 | 58,110,835 |
| 14 | 85,010,811  | 85,011,138  | 8  | 60,107,070 | 60,107,590 |
| 14 | 90,442,240  | 90,442,428  | 8  | 64,757,248 | 64,756,845 |
| 14 | 92,473,011  | 92,651,952  | 8  | 64,964,237 | 65,117,824 |
| 14 | 94,264,291  | 94,264,416  | 8  | 68,601,502 | 68,601,329 |
| 14 | 99,897,798  | 99,898,014  | 8  | 71,589,545 | 71,575,057 |
| 14 | 99,047,161  | 99,047,604  | 8  | 70,863,895 | 70,864,348 |
| 14 | 102,870,299 | 102,879,261 | 8  | 74,039,919 | 74,040,455 |
| 14 | 105,389,084 | 106,241,447 | 8  | 75,851,484 | 75,852,881 |

|    |                     |        |      |        |    |             |             |    |            |            |
|----|---------------------|--------|------|--------|----|-------------|-------------|----|------------|------------|
| B4 | FCA857              | 0.0    | 5.7  | frame  | 10 | 1,115,942   | 1,141,213   | 2  | 34,492,712 | 34,494,750 |
| B4 | IL2RA               | 21.7   | 4.4  | frame  | 10 | 6,093,511   | 6,144,278   | 2  | 30,488,342 | 30,538,793 |
| B4 | Fc.26434            | 30.7   | 4.4  | frame  | 10 | 5,844,498   | 5,844,628   | 2  | 30,763,986 | 30,764,126 |
| B4 | FCA858              | 42.2   | 3.2  | frame  | 10 |             |             |    |            |            |
| B4 | 39014767            | 49.2   | 3.2  | frame  | 10 | 4,284,926   | 4,285,037   | 2  | 31,838,969 | 31,839,181 |
| B4 | GATA3               | 66.0   | 11.4 | frame  | 10 | 8,136,673   | 8,156,859   | 2  | 28,660,191 | 28,677,888 |
| B4 | 38967995            | 78.0   | 6.6  | placed | 10 | 9,551,736   | 9,551,995   | 2  | 27,357,408 | 27,356,819 |
| B4 | 39012430            | 98.1   | 9.3  | frame  | 10 | 11,397,834  | 11,397,971  | 2  | 25,609,903 | 25,610,336 |
| B4 | Fc.112998(C10orf49) | 120.1  | 6.0  | frame  | 10 | 13,303,772  | 13,316,334  | 2  | 23,873,210 | 23,882,806 |
| B4 | NMT2                | 141.6  | 5.8  | frame  | 10 | 15,190,520  | 15,190,628  | 2  | 22,190,343 | 22,190,606 |
| B4 | VIM                 | 163.2  | 5.8  | frame  | 10 | 17,311,283  | 17,319,598  | 2  | 20,252,977 | 20,253,243 |
| B4 | LG7_C04             | 170.0  | 0.1  | placed | 10 | 17,434,233  | 17,436,246  | 2  | 20,166,481 | 20,178,990 |
| B4 | CACNB2              | 203.3  | 6.2  | frame  | 10 | 18,469,612  | 18,870,044  | 2  | 19,116,261 | 19,479,772 |
| B4 | FCA859              | 234.7  | 3.8  | placed | 10 | 24,914,138  | 25,035,530  | 2  | 16,935,369 | 16,937,367 |
| B4 | BM11                | 252.2  | 9.3  | frame  | 10 | 22,658,818  | 22,659,128  | 2  | 14,935,342 | 14,935,652 |
| B4 | FCA861              | 297.0  | 1.9  | frame  | 10 | 31,597,613  | 31,597,979  | 2  | 10,236,568 | 10,236,959 |
| B4 | ITGB1               | 308.9  | 1.8  | frame  | 10 | 33,229,333  | 33,287,153  | 2  | 6,729,863  | 6,758,015  |
| B4 | FCA860              | 315.8  | 1.8  | frame  | 10 | 33,039,276  | 33,039,635  | 2  | 6,982,452  | 6,983,046  |
| B4 | CREM                | 341.9  | 6.9  | frame  | 10 | 35,540,306  | 35,540,700  | 2  | 4,751,296  | 4,751,701  |
| B4 | 38974750            | --     | --   | binmed | 12 | 2,389,672   | 2,389,953   | 27 | 47,443,104 | 47,443,272 |
| B4 | 39060215            | 389.8  | 10.5 | frame  | 12 | 2,584,473   | 2,584,600   | 27 | 47,650,050 | 47,649,811 |
| B4 | FCA356              | 436.4  | 6.2  | frame  | 12 | 5,077,454   | 5,212,742   | 27 | 42,658,882 | 42,659,120 |
| B4 | FCA862              | --     | --   | binmed | 12 | 6,059,144   | 6,064,098   | 27 | 41,851,057 | 41,853,162 |
| B4 | WVF                 | --     | --   | binmed | 12 | 5,998,569   | 5,999,146   | 27 | 41,911,298 | 41,912,457 |
| B4 | NTF3                | 445.7  | 6.2  | frame  | 12 | 5,473,642   | 5,474,415   | 27 | 42,372,467 | 42,373,238 |
| B4 | TNFRSF1A            | 455.0  | 2.7  | placed | 12 | 6,312,793   | 6,312,935   | 27 | 41,630,033 | 41,638,689 |
| B4 | CD9                 | 459.5  | 2.4  | frame  | 12 | 6,214,654   | 6,214,754   | 27 | 41,731,031 | 41,763,028 |
| B4 | Fc.estTDE7          | 461.8  | 0.7  | placed | 12 |             |             |    |            |            |
| B4 | TPH1                | 461.8  | 0.7  | placed | 12 | 6,848,770   | 6,848,845   | 27 | 41,141,314 | 41,141,946 |
| B4 | GAPD                | 466.3  | 1.9  | frame  | 12 | 6,513,945   | 6,517,797   | 27 | 41,454,631 | 41,456,535 |
| B4 | CD4                 | 478.1  | 1.9  | frame  | 12 | 6,798,273   | 6,798,335   | 27 | 41,188,391 | 41,236,387 |
| B4 | 39010218            | 528.8  | 1.2  | frame  | 12 | 16,368,770  | 16,369,163  | 27 | 33,418,173 | 33,417,434 |
| B4 | FCA677              | 556.4  | 2.0  | frame  | 12 |             |             |    |            |            |
| B4 | GSDA                | 563.2  | 2.0  | frame  | 12 | 10,742,956  | 10,767,218  | 27 | 38,074,276 | 38,074,599 |
| B4 | CDKN1B              | 574.6  | 3.0  | frame  | 12 | 12,761,979  | 12,762,507  | 27 | 36,617,629 | 36,621,253 |
| B4 | IAPP                | 604.5  | 5.6  | frame  | 12 | 21,422,445  | 21,422,644  | 27 | 29,305,849 | 29,306,113 |
| B4 | FCA016              | 626.8  | 4.7  | placed | 12 | 52,616,951  | 52,617,015  | 27 | 4,449,538  | 4,449,761  |
| B4 | 38987995            | 650.0  | 3.8  | placed | 12 | 24,467,397  | 24,467,671  | 27 | 25,965,058 | 25,965,820 |
| B4 | F98                 | 677.9  | 3.2  | frame  | 12 | 24,174,864  | 24,174,982  | 27 | 26,250,294 | 26,250,714 |
| B4 | PTHLH               | 696.8  | 2.0  | frame  | 12 | 28,007,694  | 28,007,872  | 27 | 22,757,608 | 22,757,814 |
| B4 | FCA863              | 710.6  | 2.0  | frame  | 12 | 28,970,376  | 29,192,167  | 27 | 21,738,598 | 21,738,982 |
| B4 | 39038115            | 756.1  | 3.4  | frame  | 12 | 38,776,315  | 38,776,421  | 27 | 16,509,209 | 16,509,001 |
| B4 | LG9-14_H09          | 792.8  | 2.8  | frame  | 12 | 45,491,701  | 45,492,183  | 27 | 10,710,679 | 10,711,171 |
| B4 | FCA865              | 820.8  | 2.8  | frame  | 12 | 44,897,204  | 44,919,945  | 27 | 11,215,807 | 11,217,865 |
| B4 | COL2A1              | 832.7  | 3.1  | frame  | 12 | 46,654,260  | 46,654,399  | 27 | 9,787,983  | 9,788,335  |
| B4 | LG_18.79            | 839.8  | 3.1  | frame  | 12 | 46,790,549  | 46,791,035  | 27 | 9,660,506  | 9,660,934  |
| B4 | TEGT                | 853.9  | 4.0  | frame  | 12 | 48,442,986  | 48,443,208  | 27 | 7,926,607  | 7,927,001  |
| B4 | SLC11A2             | 881.5  | 3.8  | frame  | 12 | 49,696,199  | 49,696,272  | 27 | 6,815,644  | 6,816,120  |
| B4 | 39011755            | 903.3  | 1.7  | placed | 12 | 52,787,151  | 52,800,413  | 27 | 4,153,993  | 4,165,453  |
| B4 | HOX3A               | 911.5  | 3.8  | frame  | 12 | 52,691,038  | 52,691,356  | 27 | 4,258,791  | 4,260,064  |
| B4 | CD63                | 940.7  | 1.4  | frame  | 12 | 54,405,585  | 54,408,400  | 10 | 3,189,550  | 3,191,940  |
| B4 | RPS26               | 964.2  | 1.4  | frame  | 12 | 54,722,192  | 54,724,272  | 10 | 3,426,217  | 3,427,509  |
| B4 | RPL41               | 986.6  | 3.8  | frame  | 12 | 54,796,640  | 54,797,882  | 10 | 3,500,652  | 3,501,700  |
| B4 | NACA                | 991.1  | 1.8  | placed | 12 | 54,392,552  | 55,405,350  | 10 | 4,004,201  | 4,005,442  |
| B4 | LG4_E03             | 998.0  | 3.8  | frame  | 12 | 55,871,372  | 55,872,438  | 10 | 4,385,712  | 4,386,187  |
| B4 | FCA864              | 1012.5 | 2.0  | frame  | 12 | 62,174,942  | 62,175,111  | 10 | 9,621,116  | 9,621,280  |
| B4 | FCA865              | 1019.5 | 2.0  | frame  | 12 | 63,315,650  | 63,325,793  | 10 | 10,375,914 | 10,383,042 |
| B4 | FCA867              | 1041.3 | 1.9  | frame  | 12 | 60,870,361  | 60,870,600  | 10 | 8,345,804  | 8,346,107  |
| B4 | FCA051              | 1053.3 | 0.7  | placed | 12 | 66,214,796  | 66,214,965  | 10 | 12,965,394 | 12,965,587 |
| B4 | MDM2                | 1066.6 | 1.8  | placed | 12 | 67,489,248  | 67,510,120  | 10 | 14,009,661 | 14,035,639 |
| B4 | IFNG                | 1125.1 | 2.5  | frame  | 12 | 66,835,268  | 66,835,352  | 10 | 13,480,486 | 13,480,791 |
| B4 | FCA044              | 1140.4 | 0.8  | placed | 12 | 69,075,789  | 69,091,519  | 10 | 15,287,798 | 15,297,485 |
| B4 | LG_20.20            | 1150.5 | 0.1  | placed | 12 | 66,461,698  | 66,462,963  | 10 | 13,164,248 | 13,164,780 |
| B4 | FCA868              | 1152.8 | 4.9  | frame  | 12 | 65,086,715  | 65,086,802  | 10 | 12,460,777 | 12,463,223 |
| B4 | LG5-16_A11          | 1159.8 | 4.9  | frame  | 12 | 72,980,127  | 72,981,140  | 10 | 18,282,968 | 18,283,358 |
| B4 | FCA866              | 1169.4 | 4.9  | frame  | 12 | 70,064,102  | 70,064,249  | 10 | 16,049,359 | 16,049,627 |
| B4 | 39095536            | 1181.5 | 2.7  | frame  | 12 | 75,382,346  | 75,382,603  | 15 | 22,443,285 | 22,442,908 |
| B4 | 39088367            | 1196.2 | 2.7  | frame  | 12 | 79,161,245  | 79,161,465  | 15 | 25,667,590 | 25,667,118 |
| B4 | 39014201            | 1203.7 | 3.6  | placed | 12 | 82,048,643  | 82,049,166  | 15 | 28,040,590 | 28,039,924 |
| B4 | LG22_F03            | 1232.9 | 5.4  | frame  | 12 | 85,319,652  | 85,330,260  | 15 | 30,864,373 | 30,864,885 |
| B4 | FCA852              | 1251.3 | 1.4  | placed | 12 | 86,461,476  | 86,461,569  | 15 | 31,775,505 | 31,775,725 |
| B4 | MGF                 | 1256.0 | 4.0  | frame  | 12 | 87,412,559  | 87,412,612  | 15 | 32,620,554 | 32,620,946 |
| B4 | RD114-3B            | 1263.3 | 4.0  | frame  | 12 |             |             |    |            |            |
| B4 | FCA210              | 1268.4 | 5.1  | placed | 12 | 89,860,401  | 89,898,788  | 15 | 34,207,737 | 34,207,903 |
| B4 | FCA187              | 1279.2 | 4.4  | frame  | 12 | 94,508,994  | 94,511,154  | 15 | 39,495,662 | 39,495,872 |
| B4 | FCA735              | 1286.9 | 4.4  | frame  | 15 | 37,633,629  | 37,655,740  | 30 | 9,609,753  | 9,612,081  |
| B4 | FCA869              | 1292.0 | 2.9  | placed | 12 | 95,482,813  | 95,482,916  | 15 | 39,307,548 | 39,307,775 |
| B4 | LG30_F04            | 1297.2 | 4.9  | frame  | 12 | 91,502,838  | 91,503,119  | 15 | 36,012,586 | 36,012,933 |
| B4 | LG4_C03             | 1310.8 | 6.3  | frame  | 12 | 97,198,710  | 97,198,810  | 15 | 40,762,860 | 40,762,960 |
| B4 | 39022374            | 1336.2 | 0.4  | placed | 12 | 105,089,949 | 105,087,043 | 10 | 33,672,049 | 33,671,726 |
| B4 | 38988828            | 1338.7 | 4.1  | frame  | 12 | 103,982,125 | 103,982,193 | 10 | 36,556,509 | 36,556,749 |
| B4 | 39014425            | 1346.3 | 4.1  | frame  | 3  | 14,666,287  | 14,666,531  | 23 | 7,437,024  | 7,436,888  |
| B4 | LG30_G05            | 1353.8 | 4.9  | frame  | 12 | 105,659,010 | 105,659,475 | 10 | 35,238,757 | 35,239,188 |
| B4 | LG33_C10            | 1353.8 | 4.9  | frame  | 12 | 106,129,866 | 106,129,960 | 10 | 34,794,095 | 34,794,438 |
| B4 | 39079474            | 1358.8 | 0.4  | placed | 12 | 106,480,829 | 106,480,953 | 10 | 34,484,944 | 34,484,770 |
| B4 | TIMP3               | 1361.2 | 4.9  | frame  | 22 | 31,579,862  | 31,581,108  | 10 | 33,869,406 | 33,923,641 |
| B4 | FCA232              | 1371.9 | 2.4  | placed | 22 | 32,689,487  | 32,689,938  | 10 | 33,029,323 | 33,029,678 |
| B4 | FCA520              | 1377.0 | 2.7  | frame  | 22 | 34,368,923  | 34,383,457  | 10 | 31,732,165 | 31,732,599 |
| B4 | FCA460              | 1384.5 | 0.4  | placed | 22 | 33,803,073  | 33,806,227  | 10 | 27,150,634 | 27,150,728 |
| B4 | TST                 | 1389.4 | 2.4  | frame  | 22 | 35,731,406  | 35,739,971  | 10 | 30,676,162 | 30,676,558 |
| B4 | FCA871              | 1391.9 | 0.3  | placed | 22 | 35,587,894  | 35,588,015  | 10 | 30,785,326 | 30,785,612 |
| B4 | Fc.40342            | 1394.3 | 2.7  | placed | 22 | 36,494,801  | 36,494,849  | 10 | 30,034,294 | 30,034,548 |
| B4 | PDGFB               | 1396.7 | 2.4  | frame  | 22 | 37,946,293  | 37,946,390  | 10 | 28,983,431 | 28,985,637 |
| B4 | FCA870              | --     | --   | binmed | 22 | 37,602,728  | 37,603,005  | 10 | 29,131,257 | 29,131,530 |
| B4 | NDUFA6              | 1409.0 | 4.3  | frame  | 22 | 40,807,563  | 40,807,672  | 10 | 26,445,054 | 26,451,410 |
| B4 | FCA1056             | --     | --   | binmed | 22 | 44,789,641  | 44,800,348  | 10 | 23,207,842 | 23,218,572 |
| B4 | FCA069              | 1416.1 | 2.2  | placed | 22 | 42,513,973  | 42,514,238  | 10 | 25,004,272 | 25,004,570 |
| B4 | FCA736              | 1431.0 | 3.2  | placed | 22 | 44,087,695  | 44,100,253  | 10 | 23,828,758 | 23,829,657 |
| B4 | 39004016            | 1443.3 | 4.3  | frame  | 22 | 48,600,107  | 48,600,448  | 10 | 20,458,700 | 20,457,956 |
| B4 | KIAA0685            | 1443.3 | 4.3  | frame  | 22 | 49,173,568  | 49,173,646  | 10 | 19,983,190 | 19,983,513 |



|    |             |        |     |        |                       |             |             |    |            |            |
|----|-------------|--------|-----|--------|-----------------------|-------------|-------------|----|------------|------------|
| C1 | FCA873      | 0.0    | 0.7 | frame  | 1                     | 4,671,415   | 4,744,932   | 5  | 61,969,483 | 61,969,669 |
| C1 | GNB1        | 8.3    | 0.7 | frame  | 1                     | 1,753,990   | 1,754,092   | 5  | 59,333,370 | 59,333,736 |
| C1 | 39045067    | 22.6   | 1.9 | frame  | 1                     | 6,639,349   | 6,639,468   | 5  | 63,514,895 | 63,515,035 |
| C1 | LG_20_37    | 65.3   | 2.3 | placed | 1                     | 7,722,271   | 7,722,280   | 5  | 64,448,763 | 64,450,309 |
| C1 | VAMP3       | 39.2   | 2.2 | placed | 1                     | 7,775,582   | 7,775,725   | 5  | 64,483,789 | 64,494,014 |
| C1 | Fc.estTDA1  | 67.1   | 2.4 | placed |                       |             |             |    |            |            |
| C1 | ENO1        | 70.0   | 2.1 | frame  | 1                     | 8,860,616   | 8,860,766   | 5  | 65,365,466 | 65,376,464 |
| C1 | UBE4B       | 81.9   | 2.1 | frame  | 1                     | 10,066,432  | 10,066,539  | 5  | 66,318,878 | 66,324,968 |
| C1 | TNFRS1B     | --     | --  | binned | [UBE4B - NPPA]        | 12,201,074  | 12,201,074  | 2  | 86,354,693 | 86,357,276 |
| C1 | 39036528    | 97.2   | 1.9 | placed | 1                     | 13,665,371  | 13,665,528  | 2  | 84,274,701 | 84,274,051 |
| C1 | NPPA        | 103.2  | 5.6 | frame  | 1                     | 11,851,790  | 11,853,254  | 2  | 86,623,046 | 86,623,245 |
| C1 | LG27_H08    | --     | --  | binned | [UBE4B - Fc.25129]    | 13,907,555  | 13,909,902  | 2  | 84,073,417 | 84,075,516 |
| C1 | LG9-14_G07  | 112.7  | 0.2 | placed | 1                     | 11,421,742  | 11,424,872  | 2  | 86,943,486 | 86,945,594 |
| C1 | Fc.25129    | 139.4  | 7.4 | frame  | 1                     | 16,530,647  | 16,530,688  | 2  | 81,974,294 | 81,975,516 |
| C1 | FCA877      | --     | --  | binned | [Fc.25129 - CDW52]    | 22,880,808  | 22,881,234  | 2  | 77,187,589 | 77,187,951 |
| C1 | FCA874      | 165.5  | 0.9 | placed | 1                     | 26,526,318  | 26,526,440  | 2  | 74,204,204 | 74,204,354 |
| C1 | FCA875      | 175.1  | 0.5 | placed | 1                     | 25,270,420  | 25,270,657  | 2  | 75,260,000 | 75,260,110 |
| C1 | LG31_D02    | 178.2  | 3.8 | frame  | 1                     | 25,396,913  | 25,397,403  | 2  | 75,163,526 | 75,164,005 |
| C1 | CDW52       | 187.5  | 2.2 | frame  | 1                     | 26,328,627  | 26,331,155  | 2  | 74,361,395 | 74,361,696 |
| C1 | FCA876      | --     | --  | binned | [LG31_D02 - 39060164] | 26,883,121  | 26,883,307  | 2  | 73,626,323 | 73,626,445 |
| C1 | FGR         | --     | --  | binned | [LG31_D02 - 39060164] | 27,626,328  | 27,626,401  | 2  | 73,346,862 | 73,347,029 |
| C1 | 39060164    | 196.3  | 2.2 | frame  | 1                     | 28,247,033  | 28,247,112  | 2  | 72,851,175 | 72,850,895 |
| C1 | LG9-16_G11  | --     | --  | binned | [Fc.25129 - COL16A1]  | 28,138,215  | 28,138,242  | 2  | 72,935,635 | 72,935,770 |
| C1 | 39060590    | 216.8  | 4.4 | placed | 1                     | 31,044,088  | 31,044,287  | 2  | 70,720,331 | 70,720,178 |
| C1 | COL16A1     | 223.2  | 3.8 | frame  | 1                     | 31,787,342  | 31,787,548  | 2  | 70,117,433 | 70,118,530 |
| C1 | YARS        | 235.1  | 3.8 | frame  | 1                     | 32,909,934  | 32,952,673  | 2  | 69,091,512 | 69,091,703 |
| C1 | 39062547    | 253.7  | 3.5 | frame  | 1                     | 48,059,797  | 48,059,895  | 15 | 15,854,979 | 15,854,824 |
| C1 | LOC127540   | 272.9  | 2.8 | frame  | 1                     | 33,998,877  | 33,999,281  | 15 | 10,917,252 | 10,917,608 |
| C1 | CAP         | 295.6  | 4.3 | frame  | 1                     | 40,207,071  | 40,207,406  | 15 | 5,504,190  | 5,504,781  |
| C1 | INSL6       | 328.8  | 3.7 | frame  | 1                     | 44,901,890  | 44,901,959  | 15 | 18,541,428 | 18,543,411 |
| C1 | TESK2       | 344.5  | 3.7 | frame  | 1                     | 45,478,649  | 45,625,926  | 15 | 17,853,168 | 17,996,749 |
| C1 | GJ44        | 382.7  | 2.5 | frame  | 1                     | 35,322,408  | 35,325,154  | 15 | 10,170,140 | 10,170,413 |
| C1 | FCA879      | 397.0  | 2.5 | frame  | 1                     | 41,162,959  | 41,511,107  | 15 | 4,838,144  | 4,838,464  |
| C1 | FCA880      | 411.3  | 0.5 | frame  |                       |             |             |    |            |            |
| C1 | 39081978    | 418.0  | 4.8 | placed | 1                     | 38,104,080  | 38,104,189  | 15 | 7,605,709  | 7,605,510  |
| C1 | NM_019073   | 418.0  | 4.3 | placed | 1                     | 48,476,431  | 48,476,590  | 15 | 15,437,492 | 15,581,993 |
| C1 | 39036492    | 424.6  | 2.3 | placed | 1                     | 50,295,944  | 50,296,046  | 15 | 13,937,271 | 13,937,485 |
| C1 | NM_014372   | 430.9  | 2.1 | frame  | 1                     | 51,447,723  | 51,447,802  | 15 | 12,930,032 | 12,933,766 |
| C1 | FCA247      | 446.3  | 0.2 | placed |                       |             |             |    |            |            |
| C1 | DIO1        | 453.7  | 2.1 | frame  | 1                     | 54,071,898  | 54,088,780  | 5  | 58,134,787 | 58,151,419 |
| C1 | 39052075    | 463.6  | 1.5 | frame  | 1                     | 58,487,717  | 58,487,780  | 5  | 54,408,460 | 54,407,913 |
| C1 | 39025347    | 473.4  | 1.5 | frame  | 1                     | 56,358,531  | 56,358,733  | 5  | 56,317,763 | 56,318,156 |
| C1 | LG9-10_C06M | 483.2  | 1.6 | placed |                       |             |             |    |            |            |
| C1 | 39952168    | 506.8  | 1.8 | placed | 1                     | 62,167,950  | 62,168,251  | 5  | 51,112,946 | 51,112,225 |
| C1 | FCA878      | 515.8  | 0.3 | frame  | 1                     | 60,845,627  | 60,845,719  | 5  | 52,292,721 | 52,292,222 |
| C1 | LEPR        | 541.3  | 2.3 | frame  | 1                     | 65,598,479  | 65,815,202  | 5  | 47,735,019 | 47,923,423 |
| C1 | LG6_F10     | 557.1  | 2.3 | frame  | 1                     | 66,571,355  | 66,572,300  | 5  | 47,083,975 | 47,086,300 |
| C1 | 39038361    | 570.0  | 4.5 | frame  | 1                     | 69,238,717  | 69,238,938  | 6  | 77,997,378 | 77,997,477 |
| C1 | NM_004768   | 573.1  | 4.0 | placed | 1                     | 70,429,102  | 70,429,236  | 6  | 77,010,648 | 77,032,709 |
| C1 | 39080787    | 574.4  | 1.3 | placed | 1                     | 68,352,615  | 68,352,786  | 6  | 78,644,234 | 78,644,512 |
| C1 | PTGER3      | 583.1  | 6.3 | frame  | 1                     | 71,224,667  | 71,225,015  | 6  | 76,467,814 | 76,469,092 |
| C1 | 39011849    | 596.2  | 5.5 | frame  | 1                     | 74,540,670  | 74,540,842  | 6  | 73,526,752 | 73,526,477 |
| C1 | PTGFR       | 614.9  | 1.2 | placed | 1                     | 78,670,450  | 78,671,249  | 6  | 69,991,440 | 70,030,126 |
| C1 | ACADM       | 617.6  | 4.4 | frame  | 1                     | 75,902,303  | 75,941,204  | 6  | 72,384,053 | 72,406,604 |
| C1 | 39038403    | 632.6  | 4.4 | frame  | 1                     | 84,003,115  | 84,003,207  | 6  | 65,510,662 | 65,510,987 |
| C1 | 39866149    | 644.7  | 6.2 | frame  | 1                     | 85,752,997  | 85,753,184  | 6  | 63,981,680 | 63,982,068 |
| C1 | FCA737      | 661.7  | 4.0 | frame  | 1                     | 90,126,928  | 90,129,256  | 6  | 60,207,669 | 60,207,860 |
| C1 | LG31_A01    | 669.7  | 0.4 | placed | 1                     | 92,090,530  | 92,091,129  | 6  | 58,521,683 | 58,522,081 |
| C1 | 39898138    | 675.0  | 4.0 | frame  | 1                     | 92,764,982  | 92,765,230  | 6  | 57,922,973 | 57,922,686 |
| C1 | ARG23       | 677.7  | 0.2 | placed | 1                     | 94,595,994  | 94,596,105  | 6  | 52,261,719 | 52,261,747 |
| C1 | FCA289      | 700.5  | 2.5 | frame  | 1                     | 96,919,794  | 96,920,986  | 6  | 54,450,124 | 54,450,755 |
| C1 | FCA738      | --     | --  | binned | [FCA289 - 39079416]   | 96,752,368  | 96,755,087  | 6  | 54,556,827 | 54,557,080 |
| C1 | LG26_C06    | 703.0  | 2.2 | placed | 1                     | 97,248,251  | 97,248,615  | 6  | 54,086,251 | 54,086,588 |
| C1 | 39079416    | 716.3  | 1.4 | frame  | 1                     | 141,413,134 | 141,413,183 | 38 | 55,443,026 | 55,442,352 |
| C1 | LG31_C07    | 723.7  | 1.2 | frame  | 1                     | 99,447,480  | 99,448,211  | 6  | 52,104,968 | 52,105,402 |
| C1 | EDG1        | 737.4  | 1.2 | frame  | 1                     | 101,414,570 | 101,419,094 | 6  | 50,403,287 | 50,405,907 |
| C1 | FCA057      | 761.9  | 9.4 | frame  |                       |             |             |    |            |            |
| C1 | LG_17_37    | 774.5  | 5.6 | frame  | 1                     | 107,693,402 | 107,694,018 | 6  | 45,625,739 | 45,626,404 |
| C1 | FCA881      | 779.2  | 3.6 | placed | 1                     | 108,947,421 | 108,988,112 | 6  | 44,555,118 | 44,555,404 |
| C1 | GNAT2       | 789.0  | 5.6 | frame  | 1                     | 109,887,756 | 109,867,747 | 6  | 43,809,429 | 43,817,810 |
| C1 | ADORA3      | 800.8  | 2.7 | frame  | 1                     | 111,754,807 | 111,755,060 | 17 | 66,587,382 | 66,587,665 |
| C1 | F37         | 807.7  | 2.7 | frame  |                       |             |             |    |            |            |
| C1 | NRAS        | 841.7  | 0.9 | frame  | 1                     | 114,959,134 | 114,972,030 | 17 | 56,225,817 | 56,227,346 |
| C1 | NGFB        | 875.5  | 0.9 | frame  | 1                     | 115,541,104 | 115,541,230 | 17 | 55,707,291 | 55,707,363 |
| C1 | FCA882      | 903.7  | 2.0 | placed |                       |             |             |    |            |            |
| C1 | C02         | 913.0  | 4.4 | frame  | 1                     | 117,009,143 | 117,023,892 | 17 | 56,376,598 | 56,398,498 |
| C1 | HSD3B1      | 934.7  | 6.2 | frame  | 1                     | 119,761,857 | 119,769,723 | 17 | 59,356,549 | 59,384,137 |
| C1 | GJ48        | 956.4  | 1.0 | frame  | 1                     | 144,604,899 | 144,606,200 | 17 | 61,114,415 | 61,114,697 |
| C1 | FCA290      | 963.3  | 1.0 | frame  | 1                     | 144,468,707 | 144,600,259 | 17 | 61,099,259 | 61,099,444 |
| C1 | NM_030920   | 982.6  | 2.6 | placed | 1                     | 147,004,880 | 147,000,990 | 17 | 62,150,426 | 62,167,527 |
| C1 | NM_018379   | 982.5  | 1.7 | placed | 1                     | 147,782,718 | 147,782,920 | 17 | 62,784,465 | 62,793,177 |
| C1 | NCL1        | 984.7  | 4.7 | frame  | 1                     | 147,365,519 | 147,365,078 | 17 | 62,458,549 | 62,453,321 |
| C1 | 39089667    | 1046.4 | 2.5 | frame  | 12                    | 32,547,137  | 32,547,535  | 27 | 19,331,021 | 19,330,554 |
| C1 | FCA883      | 1055.4 | 2.5 | frame  | 2                     | 129,938,967 | 129,970,591 | 19 | 24,130,153 | 24,150,009 |
| C1 | PROC        | 1088.1 | 7.5 | frame  | 2                     | 127,902,417 | 127,902,668 | 19 | 26,201,112 | 26,201,563 |
| C1 | FCA884      | 1121.9 | 5.0 | placed | 2                     | 120,128,132 | 120,130,302 | 19 | 33,436,586 | 33,438,772 |
| C1 | FCA739      | 1144.3 | 8.9 | frame  | 2                     | 124,894,464 | 124,894,966 | 19 | 29,089,211 | 29,089,749 |
| C1 | 39045129    | 1168.9 | 8.2 | frame  | 2                     | 125,472,698 | 125,472,928 | 19 | 28,573,522 | 28,573,237 |
| C1 | 65new       | 1196.3 | 6.5 | frame  | 2                     | 122,449,914 | 122,450,754 | 19 | 31,314,450 | 31,315,265 |
| C1 | FCA343      | 1233.5 | 6.5 | frame  | 2                     | 116,826,543 | 116,826,645 | 19 | 36,121,827 | 36,121,930 |
| C1 | LG8_F12     | 1279.3 | 3.7 | placed | 2                     | 134,494,215 | 134,496,116 | 19 | 39,859,758 | 39,861,945 |
| C1 | FCA885      | 1300.4 | 0.8 | frame  | 2                     | 133,472,803 | 133,473,041 | 19 | 38,876,950 | 38,877,163 |
| C1 | FCA740      | 1325.1 | 0.8 | frame  | 2                     | 135,571,969 | 135,571,838 | 19 | 40,853,710 | 40,854,299 |
| C1 | LG_17_79    | 1352.9 | 2.6 | frame  | 2                     | 138,137,434 | 138,138,075 | 19 | 43,255,246 | 43,255,693 |
| C1 | FCA293      | 1374.2 | 5.3 | frame  | 2                     | 139,456,538 | 139,457,278 | 19 | 44,547,629 | 44,547,847 |
| C1 | LG34_F11    | 1384.5 | 4.4 | frame  | 2                     | 140,291,196 | 140,292,407 | 19 | 45,214,255 | 45,214,962 |
| C1 | FCA480      | 1395.4 | 4.4 | frame  |                       |             |             |    |            |            |
| C1 | CXK4        | 1425.5 | 1.2 | frame  | 2                     | 136,706,171 | 136,707,214 | 19 | 41,918,309 | 41,919,355 |
| C1 | CL25022     | 1484.5 | 1.3 | frame  | 2                     | 150,251,712 | 150,252,047 | 19 | 54,208,062 | 54,208,446 |
| C1 | FCA173      | 1505.4 | 1.3 | frame  | 2                     | 154,570,912 | 154,571,224 | 36 | 3,666,141  | 3,666,475  |
| C1 | FCA886      | 1532.0 | 6.7 | frame  | 2                     | 158,377,257 | 158,378,248 | 36 | 6,776,539  | 6,791,394  |
| C1 | LOC253782   | 1561.5 | 1.7 | frame  | 2                     | 169,456,879 | 169,457,142 | 36 | 16,725,658 | 16,726,151 |
| C1 | FCA570      | 1572.5 | 1.7 | frame  | 2                     | 168,086,913 | 168,086,120 | 36 | 15,477,718 | 15,482,827 |
| C1 | LG34_D08    | 1586.9 | 1.8 | placed | 2                     | 164,388,549 | 164,387,003 | 36 | 12,125,351 | 12,125,819 |
| C1 | GAD1        | 1601.7 | 2.6 | placed | 2                     | 171,541,720 | 171,542,253 | 36 | 18,472,787 | 18,513,550 |
| C1 | FCA887      | 1607.3 | 2.9 | frame  | 2                     | 173,052,059 | 173,052,280 | 36 | 19,837,813 | 19,838,077 |
| C1 | CHRNA1      | 1616.2 | 4.7 | frame  | 2                     | 175,437,835 | 175,454,688 | 36 | 21,854,761 | 21,855,097 |
| C1 | S33         | 1625.2 | 6.4 | frame  | 2                     | 178,066,025 | 178,0       |    |            |            |

|    |            |        |        |                       |    |             |             |    |            |            |
|----|------------|--------|--------|-----------------------|----|-------------|-------------|----|------------|------------|
| C2 | FCA568     | -- --  | binned | [p-terminal - FCA892] | 21 | 46,403,212  | 46,408,332  | 31 | 41,850,469 | 41,855,027 |
| C2 | HMT1L1     | 0.0    | 3.9    | frame                 | 21 | 46,909,188  | 46,909,272  | 31 | 42,181,566 | 42,206,616 |
| C2 | FCA892     | 21.7   | 2.0    | frame                 | 21 | 45,448,894  | 45,456,589  | 31 | 41,118,283 | 41,125,235 |
| C2 | 39063613   | 32.6   | 2.0    | frame                 | 21 | 44,772,657  | 44,772,645  | 31 | 40,607,471 | 40,607,322 |
| C2 | LG21_E06   | -- --  | binned | [39063613 - SON]      | 21 | 35,098,151  | 35,098,401  | 31 | 32,300,273 | 32,300,525 |
| C2 | 39007228   | 53.5   | 9.2    | frame                 | 21 | 39,204,541  | 39,204,830  | 31 | 35,994,456 | 35,994,412 |
| C2 | FCA346     | -- --  | binned | [39063613 - SON]      | 21 | 35,225,213  | 35,225,321  | 31 | 32,419,027 | 32,419,270 |
| C2 | FCA893     | 59.0   | 2.2    | placed                | 21 | 37,766,931  | 37,800,396  | 31 | 34,595,962 | 34,598,249 |
| C2 | SON        | 32.7   | 9.2    | frame                 | 21 | 33,871,161  | 33,871,161  | 31 | 31,214,008 | 31,214,182 |
| C2 | C21orf59   | 96.9   | 1.8    | frame                 | 21 | 32,897,342  | 32,897,433  | 31 | 30,311,189 | 30,312,564 |
| C2 | FCA638     | 112.0  | 1.8    | frame                 | 21 | 29,847,747  | 29,988,254  | 31 | 27,779,508 | 27,784,770 |
| C2 | APP        | 129.8  | 2.0    | frame                 | 21 | 26,175,263  | 26,175,889  | 31 | 24,360,513 | 24,361,152 |
| C2 | FCA894     | 155.4  | 3.7    | frame                 | 21 | 21,292,643  | 21,292,848  | 31 | 21,458,199 | 21,458,510 |
| C2 | FCA896     | 169.3  | 3.7    | frame                 | 21 | 22,809,889  | 22,812,286  | 31 | 21,294,833 | 21,295,252 |
| C2 | NCAM2      | 174.4  | 2.2    | placed                | 21 | 21,292,692  | 21,834,285  | 31 | 19,906,797 | 20,424,183 |
| C2 | LG_20.77   | 189.4  | 2.5    | frame                 | 21 | 17,184,393  | 17,194,208  | 31 | 16,590,841 | 16,591,384 |
| C2 | FCA895     | 204.4  | 1.1    | frame                 | 21 | 18,422,722  | 18,423,772  | 31 | 17,474,201 | 17,476,282 |
| C2 | FCA535     | 206.7  | 2.5    | placed                | 21 | 18,539,412  | 18,560,462  | 31 | 17,543,408 | 17,543,862 |
| C2 | FCA543     | 214.0  | 1.1    | frame                 | 21 | 19,321,143  | 19,323,013  | 31 | 18,231,534 | 18,233,950 |
| C2 | LG23_B06   | 221.5  | 1.1    | frame                 | 21 | 18,158,380  | 18,159,612  | 31 | 17,282,612 | 17,283,404 |
| C2 | NRIP1      | 236.8  | 1.6    | frame                 | 21 | 15,255,433  | 15,359,126  | 31 | 14,840,488 | 14,847,902 |
| C2 | FCA899     | 273.9  | 1.2    | placed                | 3  | 81,451,067  | 81,451,323  | 31 | 9,152,856  | 9,153,122  |
| C2 | FCA898     | 276.5  | 0.8    | frame                 | 3  | 81,425,476  | 81,425,779  | 31 | 9,178,435  | 9,178,746  |
| C2 | FCA897     | 294.7  | 1.5    | frame                 | 3  | 77,044,819  | 77,045,189  | 31 | 13,098,254 | 13,098,349 |
| C2 | LG_19.17   | 301.9  | 1.5    | frame                 | 3  | 80,642,925  | 80,644,792  | 31 | 9,805,562  | 9,806,228  |
| C2 | GBE1       | 309.3  | 7.0    | frame                 | 3  | 81,622,718  | 81,893,701  | 31 | 8,721,425  | 8,987,425  |
| C2 | FCA900     | 322.0  | 6.4    | frame                 | 3  | 83,286,146  | 83,286,209  | 31 | 7,404,774  | 7,404,978  |
| C2 | FCA901     | 332.1  | 6.4    | frame                 | 3  | 85,573,796  | 85,576,700  | 31 | 5,451,194  | 5,451,287  |
| C2 | F164       | 347.4  | 6.1    | frame                 | 3  | 86,720,778  | 86,722,869  | 31 | 4,358,430  | 4,361,769  |
| C2 | 39052059   | 368.6  | 4.3    | placed                | 3  | 90,158,224  | 90,158,504  | 33 | 4,471,262  | 4,471,542  |
| C2 | FCA576     | 381.5  | 6.3    | frame                 | 3  | 95,333,102  | 95,333,535  | 33 | 4,846,578  | 4,846,866  |
| C2 | FCA903     | 391.5  | 6.3    | frame                 |    |             |             |    |            |            |
| C2 | FCA902     | 401.5  | 0.2    | placed                |    |             |             |    |            |            |
| C2 | FCA486     | 419.5  | 5.4    | frame                 | 3  | 99,536,027  | 99,536,366  | 33 | 8,269,480  | 8,271,576  |
| C2 | FCA904     | 424.5  | 2.7    | placed                | 3  | 100,462,719 | 100,462,759 | 33 | 9,012,364  | 9,012,948  |
| C2 | FCA077     | 431.7  | 5.4    | frame                 | 3  | 100,986,661 | 100,988,698 | 33 | 9,488,980  | 9,489,120  |
| C2 | 39079765   | 446.2  | 2.1    | frame                 | 3  | 103,029,417 | 103,029,627 | 33 | 11,184,089 | 11,184,182 |
| C2 | 38911591   | 458.1  | 2.1    | frame                 | 3  | 146,211,870 | 146,214,237 | 23 | 43,410,759 | 43,410,573 |
| C2 | 39077724   | 458.1  | 2.1    | frame                 | 3  | 149,558,722 | 149,559,410 | 23 | 46,363,509 | 46,363,920 |
| C2 | 39012573   | 477.6  | 3.0    | frame                 | 3  | 106,732,445 | 106,732,515 | 33 | 14,213,100 | 14,213,170 |
| C2 | 39060158   | 484.8  | 3.0    | frame                 | 3  | 109,679,898 | 109,680,048 | 33 | 17,051,558 | 17,052,216 |
| C2 | FLJ20730   | 502.1  | 5.0    | frame                 | 3  | 113,763,585 | 113,785,693 | 33 | 20,162,260 | 20,162,659 |
| C2 | FCA905     | 534.5  | 5.3    | frame                 | 3  | 113,025,278 | 113,025,534 | 33 | 19,548,148 | 19,548,480 |
| C2 | GAP43      | 568.0  | 2.4    | frame                 | 3  | 116,869,148 | 116,878,910 | 33 | 22,737,594 | 22,839,275 |
| C2 | DRD3       | 580.4  | 1.9    | frame                 | 3  | 115,330,250 | 115,380,450 | 33 | 21,442,142 | 21,483,693 |
| C2 | LG21_F12   | 590.1  | 1.9    | frame                 | 3  | 117,523,149 | 117,523,519 | 33 | 23,425,854 | 23,426,209 |
| C2 | CD80       | 621.3  | 13.2   | frame                 | 3  | 120,738,711 | 120,738,957 | 33 | 26,260,065 | 26,271,741 |
| C2 | LG25_F05   | 628.2  | 0.1    | placed                | 3  | 120,227,672 | 120,227,911 | 33 | 25,830,049 | 25,830,397 |
| C2 | CD86       | 650.5  | 2.0    | frame                 | 3  | 123,307,734 | 123,307,960 | 33 | 28,372,713 | 28,389,868 |
| C2 | FCA483     | 652.5  | 2.7    | placed                | 3  | 123,899,174 | 123,900,462 | 33 | 28,650,278 | 28,650,610 |
| C2 | FCA906     | 671.3  | 1.5    | frame                 | 3  | 124,438,403 | 124,438,478 | 33 | 29,367,513 | 29,367,756 |
| C2 | 39011719   | 704.2  | 0.6    | placed                | 3  | 199,195,500 | 199,195,696 | 33 | 31,795,716 | 31,795,912 |
| C2 | TFRC       | 718.1  | 7.4    | frame                 | 3  | 197,267,123 | 197,267,365 | 33 | 32,287,442 | 32,309,298 |
| C2 | FCA907     | 826.4  | 7.8    | placed                |    |             |             |    |            |            |
| C2 | 39029479   | 888.3  | 5.6    | placed                | 3  | 189,888,515 | 189,888,744 | 34 | 24,054,137 | 24,054,366 |
| C2 | DKG        | 909.6  | 7.6    | frame                 | 3  | 187,349,714 | 187,562,705 | 34 | 21,901,328 | 22,094,723 |
| C2 | SST        | 933.6  | 1.5    | placed                | 3  | 188,869,406 | 188,870,808 | 34 | 23,144,173 | 23,145,510 |
| C2 | FLJ11198   | 952.6  | 0.6    | frame                 | 3  | 185,394,033 | 185,394,310 | 34 | 20,167,328 | 20,167,783 |
| C2 | LG4_F04    | 961.7  | 0.2    | placed                | 3  | 182,900,358 | 182,900,872 | 34 | 17,917,484 | 17,918,056 |
| C2 | LG9-10_G02 | 964.0  | 0.6    | frame                 | 3  | 182,559,661 | 182,560,302 | 34 | 17,628,616 | 17,629,246 |
| C2 | LG4_G05    | 968.6  | 2.3    | placed                | 3  | 158,411,836 | 158,412,415 | 38 | 22,545,611 | 22,545,816 |
| C2 | FCA908     | 978.4  | 1.3    | frame                 | 3  | 179,423,652 | 179,425,242 | 34 | 44,604,904 | 44,607,292 |
| C2 | FCA909     | 988.2  | 1.3    | frame                 | 3  | 179,212,847 | 179,212,959 | 34 | 44,417,110 | 44,417,573 |
| C2 | SLC2A2     | 1023.3 | 1.5    | frame                 | 3  | 172,196,839 | 172,227,470 | 34 | 38,449,489 | 38,479,160 |
| C2 | FCA424     | 1037.4 | 1.5    | frame                 | 3  | 169,842,726 | 169,842,942 | 34 | 36,445,390 | 36,445,573 |
| C2 | Ig4_a08    | 1049.3 | 2.2    | placed                | 3  | 169,109,166 | 169,109,340 | 34 | 35,789,354 | 35,789,527 |
| C2 | BCH1       | 1053.5 | 2.2    | frame                 | 3  | 167,033,027 | 167,031,556 | 34 | 33,939,069 | 34,057,511 |
| C2 | FCA910     | 1073.3 | 0.9    | frame                 | 3  | 165,842,501 | 165,845,314 | 34 | 33,101,153 | 33,101,436 |
| C2 | FCA911     | 1085.0 | 0.9    | frame                 | 3  | 165,374,141 | 165,374,359 | 34 | 32,759,441 | 32,759,682 |
| C2 | LG24_D11   | 1110.3 | 0.5    | frame                 |    |             |             |    |            |            |
| C2 | IL12A      | 1119.9 | 0.5    | frame                 | 3  | 161,193,499 | 161,193,612 | 34 | 29,218,273 | 29,219,233 |
| C2 | FCA912     | 1129.8 | 4.4    | frame                 | 3  | 159,005,504 | 159,006,799 | 23 | 54,295,936 | 54,298,059 |
| C2 | LG25_G06   | 1142.7 | 4.4    | frame                 | 3  | 155,261,576 | 155,261,576 | 23 | 51,293,513 | 51,295,802 |
| C2 | FCA310     | 1169.5 | 2.0    | frame                 | 3  | 151,605,170 | 151,605,295 | 23 | 48,136,708 | 48,136,830 |
| C2 | FCA913     | 1176.8 | 2.0    | frame                 | 3  | 150,073,843 | 150,074,050 | 23 | 46,776,718 | 46,776,920 |
| C2 | CP         | 1184.1 | 3.0    | frame                 | 3  | 150,399,990 | 150,400,126 | 23 | 47,063,781 | 47,064,124 |
| C2 | FLJ23751   | -- --  | binned | [CP - FCA914]         | 3  | 142,495,622 | 142,496,039 | 23 | 40,250,120 | 40,250,693 |
| C2 | RAS2       | 1215.9 | 4.0    | frame                 | 3  | 142,688,624 | 142,614,551 | 23 | 40,463,844 | 40,558,915 |
| C2 | FCA914     | 1232.5 | 4.0    | frame                 | 3  | 140,420,543 | 140,421,754 | 23 | 38,433,807 | 38,435,908 |
| C2 | PCCB       | 1257.5 | 8.2    | frame                 | 3  | 137,531,447 | 137,531,663 | 23 | 35,834,686 | 35,837,556 |
| C2 | FCA918     | 1275.4 | 3.6    | placed                | 3  | 133,077,426 | 133,077,900 | 23 | 31,974,422 | 31,976,533 |
| C2 | TF         | 1280.3 | 5.2    | frame                 | 3  | 134,956,050 | 134,956,197 | 23 | 33,713,657 | 33,718,250 |
| C2 | RD114-3D   | 1290.4 | -- --  | binned                |    |             |             |    |            |            |
| C2 | FCA915     | -- --  | binned | [RD114-3D - 39011832] | 3  | 18,369,373  | 18,369,420  | 23 | 27,731,353 | 27,731,754 |
| C2 | 39047901   | 1297.9 | 2.6    | placed                | 3  | 132,390,037 | 132,390,180 | 23 | 31,416,582 | 31,417,011 |
| C2 | DAZLA      | 1302.9 | 1.5    | frame                 | 3  | 16,613,252  | 16,613,406  | 23 | 29,247,603 | 29,248,012 |
| C2 | 39011832   | 1315.6 | 2.6    | frame                 | 3  | 17,006,208  | 17,008,388  | 23 | 11,227,799 | 11,227,574 |
| C2 | FCA117     | 1332.8 | 2.6    | frame                 | 3  | 17,905,279  | 17,905,353  | 23 | 28,151,146 | 28,151,959 |
| C2 | TGFBP2     | 1365.2 | 5.2    | frame                 | 3  | 30,623,012  | 30,710,579  | 23 | 16,910,554 | 16,961,926 |
| C2 | LG26_F07   | 1375.5 | 5.2    | frame                 | 3  | 30,610,526  | 30,612,061  | 23 | 17,009,194 | 17,011,287 |
| C2 | LG_17.22   | 1386.1 | 5.6    | frame                 | 3  | 31,247,382  | 31,248,070  | 23 | 16,439,239 | 16,440,117 |
| C2 | 38998996   | 1388.7 | 3.2    | placed                | 3  | 31,413,397  | 31,413,487  | 23 | 16,278,082 | 16,278,172 |
| C2 | FCA148     | 1393.9 | 5.1    | frame                 | 3  | 31,203,231  | 31,211,496  | 23 | 16,342,282 | 16,612,799 |
| C2 | GORASP1    | 1410.2 | 7.4    | frame                 | 3  | 38,113,847  | 38,116,000  | 23 | 11,779,451 | 11,781,070 |
| C2 | 39047674   | -- --  | binned | [GORASP1 - GLB1]      | 3  | 43,785,249  | 43,785,494  | 23 | 5,543,339  | 5,544,123  |
| C2 | LG9-14_B12 | 1415.4 | 4.7    | placed                | 3  | 40,205,815  | 40,206,068  | 23 | 12,710,157 | 12,710,450 |
| C2 | 38999057   | 1423.4 | 4.2    | frame                 | 3  | 44,020,945  | 44,021,379  | 23 | 5,339,595  | 5,339,990  |
| C2 | NM_016006  | 1425.9 | 2.0    | placed                | 3  | 43,718,758  | 43,719,084  | 23 | 5,589,486  | 5,621,973  |
| C2 | GLB1       | 1428.8 | 4.2    | frame                 | 3  | 33,085,315  | 33,085,462  | 23 | 6,739,392  | 6,821,491  |
| C2 | 38911486   | 1431.1 | 2.5    | placed                | 3  | 35,335,889  | 35,336,005  | 23 | 8,458,372  | 8,458,488  |
| C2 | FCA917     | 1431.1 | 2.5    | placed                | 3  | 34,613,010  | 34,613,343  | 23 | 7,835,870  | 7,836,202  |
| C2 | 39079567   | 1444.8 | 3.6    | frame                 | 3  | 37,679,573  | 37,679,734  | 23 | 10,480,237 | 10,480,388 |
| C2 | LG34_G07   | -- --  | binned | [39079567 - 39017835] | 3  | 40,614,439  | 40,615,036  | 23 | 13,034,341 | 13,035,203 |
| C2 | FCA916     | -- --  | binned | [39079567 - 39017835] | 3  | 40,398,899  | 40,400,113  | 23 | 12,863,044 | 12,866,428 |
| C2 | 39091213   | 1458.5 | 3.6    | frame                 | 3  | 40,494,403  | 40,494,526  | 23 | 12,932,058 | 12,932,183 |
| C2 | 39017886   | 1468.8 | 4.7    | frame                 | 3  | 16,153      |             |    |            |            |

|    |                      |        |     |                           |    |             |             |       |            |            |
|----|----------------------|--------|-----|---------------------------|----|-------------|-------------|-------|------------|------------|
| D1 | LG24_G04             | 0.0    | 9.2 | frame                     | 11 | 103,281,228 | 103,281,677 | 5     | 31,071,148 | 31,071,604 |
| D1 | LG24_A10             | 42.2   | 4.8 | frame                     | 11 | 103,945,677 | 103,946,342 | 5     | 30,454,067 | 30,455,606 |
| D1 | LG_19_27             | 51.9   | 4.8 | frame                     | 11 | 103,403,829 | 103,404,897 | 5     | 30,954,134 | 30,954,873 |
| D1 | MMP3                 | 64.9   | 3.2 | placed                    | 11 | 102,211,742 | 102,219,530 | 5     | 31,976,903 | 31,985,612 |
| D1 | MMP7                 | 86.6   | 6.8 | frame                     | 11 | 101,903,527 | 101,903,615 | 5     | 32,170,820 | 32,174,075 |
| D1 | ACAT1                | 132.1  | 1.6 | frame                     | 11 | 107,514,832 | 107,514,979 | 5     | 27,347,626 | 27,352,211 |
| D1 | FCA920               | 139.1  | 1.6 | frame                     | 11 | 107,208,829 | 107,209,005 | 5     | 27,601,328 | 27,601,564 |
| D1 | LG_19_50             | 156.2  | 3.6 | frame                     | 11 | 111,060,917 | 111,061,447 | 5     | 24,377,541 | 24,377,827 |
| D1 | LG31_E12             | 163.1  | 2.7 | placed                    | 11 | 110,448,094 | 110,451,253 | 5     | 24,899,828 | 24,899,656 |
| D1 | LG35_B09             | 167.7  | 3.6 | frame                     | 11 | 108,910,826 | 108,911,434 | 5     | 26,182,330 | 26,182,791 |
| D1 | IL18                 | 177.4  | 6.1 | frame                     | 11 | 111,519,538 | 111,519,712 | 5     | 23,969,742 | 23,975,693 |
| D1 | LG22_B02             | --     | --  | binnead [IL18 - FCA922]   | 11 | 111,775,020 | 111,775,533 | 5     | 23,738,949 | 23,739,486 |
| D1 | DRD2                 | 194.9  | 5.9 | frame                     | 11 | 112,785,528 | 112,851,103 | 5     | 22,711,965 | 22,714,370 |
| D1 | FCA922               | 215.3  | 5.9 | frame                     | 11 | 116,128,588 | 116,128,653 | 5     | 19,788,223 | 19,788,433 |
| D1 | MGC13125             | 235.6  | 7.5 | frame                     | 11 | 116,222,307 | 116,222,453 | 5     | 19,707,208 | 19,709,177 |
| D1 | KIAA0999             | 250.0  | 7.5 | frame                     | 11 | 118,731,147 | 118,731,312 | 5     | 17,526,225 | 17,526,584 |
| D1 | Fc.23690             | 266.9  | 2.1 | frame                     | 11 | 117,536,639 | 117,536,716 | 5     | 18,508,033 | 18,508,267 |
| D1 | FCA193               | 275.9  | 2.1 | frame                     | 11 | 117,812,415 | 117,898,118 | 5     | 18,187,905 | 18,244,610 |
| D1 | MLL                  | 280.3  | 2.4 | placed                    | 11 | 118,470,045 | 118,470,198 | 5     | 17,741,862 | 17,742,228 |
| D1 | H2AFX                | 291.8  | 9.2 | frame                     | 11 | 118,796,012 | 118,796,169 | 5     | 17,482,571 | 17,482,800 |
| D1 | THY1                 | 328.8  | 7.9 | frame                     | 11 | 123,101,915 | 123,130,480 | 5     | 13,627,408 | 13,627,682 |
| D1 | FCA087               | 383.5  | 5.3 | frame                     | 11 | 122,045,808 | 122,046,548 | 5     | 14,592,590 | 14,593,143 |
| D1 | LG9_9_D06            | 415.8  | 0.5 | placed                    | 11 | 122,568,544 | 122,568,891 | 5     | 14,188,987 | 14,189,013 |
| D1 | FCA144               | 428.3  | 2.3 | placed                    | 11 | 122,785,093 | 122,785,156 | 5     | 13,970,556 | 13,970,609 |
| D1 | FCA1057              | 430.6  | 5.3 | frame                     | 11 | 126,015,134 | 126,015,600 | 5     | 10,889,192 | 10,889,628 |
| D1 | LG5_F01              | 439.8  | 0.3 | placed                    | 11 | 127,587,477 | 127,587,976 | 5     | 9,404,324  | 9,404,994  |
| D1 | LG34_D04             | 441.9  | 7.1 | frame                     | 11 | 125,055,828 | 125,055,910 | 5     | 11,809,981 | 11,810,143 |
| D1 | FCA1055              | 444.2  | 0.7 | placed                    | 11 | 125,121,402 | 125,124,900 | 5     | 11,653,530 | 11,653,780 |
| D1 | FATE                 | 444.2  | 0.7 | placed                    | 11 | 125,679,309 | 125,720,705 | 5     | 11,126,965 | 11,127,260 |
| D1 | FCA923               | 446.4  | 2.0 | placed                    | 11 | 124,069,412 | 124,069,567 | 5     | 12,686,118 | 12,691,132 |
| D1 | SPA17                | 462.7  | 2.5 | placed                    | 11 | 125,637,503 | 125,637,693 | 5     | 11,219,490 | 11,219,871 |
| D1 | FLJ21103             | 478.8  | 4.0 | frame                     | 11 | 129,277,422 | 129,333,012 | 5     | 7,881,355  | 7,893,555  |
| D1 | FCA927               | 511.8  | 4.0 | frame                     | 11 | 100,414,313 | 100,506,465 | 21    | 3,470,504  | 3,574,043  |
| D1 | RGR                  | 580.0  | 3.2 | frame                     | 11 | 95,607,712  | 95,608,028  | 21    | 7,934,838  | 7,935,115  |
| D1 | FCA928               | 654.4  | 6.0 | frame                     | 11 | 95,378,806  | 95,379,218  | 21    | 8,147,277  | 8,147,541  |
| D1 | FCA929               | 668.3  | 6.0 | frame                     | 11 | 91,346,416  | 91,348,676  | 21    | 11,586,152 | 11,586,456 |
| D1 | FCA930               | 696.2  | 4.9 | frame                     | 11 | 88,564,031  | 88,564,235  | 21    | 13,863,015 | 13,895,318 |
| D1 | FCA931               | 735.9  | 3.0 | frame                     | 11 | 85,818,745  | 85,823,568  | 21    | 16,134,729 | 16,134,913 |
| D1 | TYR                  | 757.4  | 3.0 | frame                     | 11 | 81,915,986  | 81,916,313  | 21    | 19,581,304 | 19,581,450 |
| D1 | LG_17_46             | 776.4  | 3.4 | frame                     | 11 | 808.5       | 3.0         | frame |            |            |
| D1 | FCA932               | 788.1  | 4.4 | frame                     | 11 | 77,673,479  | 77,679,776  | 21    | 23,571,926 | 23,572,570 |
| D1 | FCA933               | 808.5  | 3.0 | frame                     | 11 | 76,572,994  | 76,575,680  | 21    | 24,522,687 | 24,524,298 |
| D1 | FCA076               | 823.1  | 2.9 | frame                     | 11 | 4,457,192   | 4,457,539   | 21    | 29,890,395 | 29,890,787 |
| D1 | FCA067               | 844.0  | 2.9 | frame                     | 11 | 5,495,546   | 5,816,435   | 21    | 30,840,849 | 30,856,549 |
| D1 | LG9-16_C11           | 861.9  | 3.9 | frame                     | 11 | 5,203,272   | 5,204,877   | 21    | 30,429,631 | 30,429,755 |
| D1 | FCA347               | 874.2  | 6.5 | frame                     | 11 | 9,615,565   | 9,616,701   | 21    | 29,240,634 | 29,240,242 |
| D1 | HHB                  | 884.0  | 4.6 | frame                     | 11 | 71,845,428  | 71,845,428  | 21    | 29,734,427 | 29,734,724 |
| D1 | 39039465             | 894.0  | 2.3 | frame                     | 11 | 8,415,453   | 8,415,580   | 21    | 34,178,596 | 34,177,893 |
| D1 | FCA934               | 896.5  | 0.4 | placed                    | 11 | 6,109,765   | 6,110,157   | 21    | 31,667,225 | 31,667,509 |
| D1 | 39014292             | 916.6  | 2.3 | placed                    | 11 | 6,745,811   | 6,746,004   | 21    | 32,365,617 | 32,365,779 |
| D1 | 19_039new            | 923.4  | 1.9 | frame                     | 11 | 8,754,126   | 8,754,345   | 21    | 34,447,266 | 34,447,483 |
| D1 | 39161041             | 933.3  | 1.5 | frame                     | 11 | 14,939,112  | 14,939,695  | 21    | 39,949,470 | 39,950,015 |
| D1 | LG26_B02             | 948.5  | 1.5 | frame                     | 11 | 15,630,574  | 15,630,699  | 21    | 40,707,206 | 40,707,354 |
| D1 | LG25_C12             | 948.5  | 1.0 | placed                    | 11 | 19,901,717  | 19,901,937  | 21    | 44,254,100 | 44,253,673 |
| D1 | LG21_B02             | 968.0  | 2.1 | placed                    | 11 | 11,441,840  | 11,442,084  | 21    | 36,819,253 | 36,819,594 |
| D1 | FCA936               | 979.6  | 2.9 | frame                     | 11 | 13,470,527  | 13,470,789  | 21    | 38,683,229 | 38,686,310 |
| D1 | 39010310             | 985.2  | 0.3 | placed                    | 11 | 21,726,465  | 21,726,878  | 21    | 45,859,353 | 45,859,758 |
| D1 | FCA935               | 993.3  | 2.9 | frame                     | 11 | 10,465,352  | 10,465,493  | 21    | 35,899,761 | 35,899,144 |
| D1 | PTH                  | --     | --  | binnead [FCA936 - LDHA]   | 11 | 19,269,205  | 19,270,349  | 21    | 43,660,764 | 43,664,625 |
| D1 | LG23_C04             | --     | --  | binnead [FCA936 - LDHA]   | 11 | 18,379,032  | 18,379,138  | 21    | 43,096,349 | 43,096,584 |
| D1 | 39082390             | 1003.9 | 1.5 | placed                    | 11 | 18,224,033  | 18,224,173  | 21    | 42,896,807 | 42,897,294 |
| D1 | F49                  | 1017.6 | 3.6 | placed                    | 11 | 32,365,897  | 32,413,653  | 18    | 45,710,376 | 45,713,940 |
| D1 | LDHA                 | 1020.2 | 6.4 | frame                     | 11 | 30,211,913  | 30,211,994  | 21    | 52,554,682 | 52,554,770 |
| D1 | SAA                  | 1032.9 | 6.4 | frame                     | 11 | 27,635,944  | 27,636,687  | 21    | 50,464,796 | 50,465,539 |
| D1 | WT1                  | 1045.4 | 2.6 | frame                     | 11 | 26,859,206  | 26,859,304  | 21    | 49,697,509 | 49,697,873 |
| D1 | FSHB                 | 1052.7 | 3.8 | frame                     | 11 | 28,510,375  | 28,510,550  | 21    | 51,181,427 | 51,181,983 |
| D1 | BDNF                 | 1065.4 | 1.2 | frame                     | 11 | 32,808,995  | 32,809,135  | 18    | 45,359,309 | 45,359,525 |
| D1 | FCA937               | 1067.8 | 1.2 | placed                    | 11 | 25,680,182  | 25,683,120  | 21    | 48,911,218 | 48,915,698 |
| D1 | FCA741               | 1060.5 | 1.2 | frame                     | 11 | 23,967,496  | 23,983,480  | 21    | 47,548,595 | 47,555,457 |
| D1 | FCA940               | 1102.2 | 1.9 | frame                     | 11 | 34,508,139  | 34,510,337  | 18    | 43,914,960 | 43,915,154 |
| D1 | FCA938               | --     | --  | binnead [FCA940 - FCA941] | 11 | 34,434,178  | 34,434,369  | 18    | 43,986,371 | 43,986,671 |
| D1 | FCA939               | 1118.9 | 2.2 | placed                    | 11 | 34,597,511  | 34,597,630  | 18    | 43,823,122 | 43,823,425 |
| D1 | FCA998               | 1124.1 | 1.9 | frame                     | 11 | 35,243,647  | 35,243,881  | 18    | 43,244,890 | 43,244,869 |
| D1 | FCA941               | 1137.2 | 2.1 | frame                     | 11 | 35,641,236  | 35,784,617  | 18    | 42,818,763 | 42,818,800 |
| D1 | CAT                  | 1150.5 | 1.9 | frame                     | 11 | 36,571,536  | 36,571,979  | 18    | 42,204,832 | 42,205,275 |
| D1 | FCA942               | 1155.8 | 0.2 | placed                    | 11 | 36,817,276  | 36,817,742  | 18    | 41,995,474 | 41,995,917 |
| D1 | SLC1A2               | 1158.5 | 1.9 | frame                     | 11 | 38,225,999  | 38,226,251  | 18    | 40,846,328 | 40,846,575 |
| D1 | FCA180               | 1164.1 | 0.1 | placed                    | 11 | 41,371,639  | 41,371,990  | 18    | 38,335,754 | 38,337,970 |
| D1 | RAG2                 | 1172.0 | 2.9 | placed                    | 11 | 44,224,898  | 44,225,365  | 18    | 55,323,850 | 55,324,510 |
| D1 | LG34_D09             | 1178.3 | 1.2 | placed                    | 11 | 47,745,271  | 47,745,466  | 18    | 52,245,753 | 52,246,226 |
| D1 | FCA239               | 1181.0 | 3.3 | frame                     | 11 | 54,990,893  | 54,991,659  | 18    | 51,431,336 | 51,432,123 |
| D1 | 39011723             | 1194.2 | 3.2 | frame                     | 11 | 56,724,957  | 56,725,193  | 18    | 49,473,148 | 49,473,642 |
| D1 | 38994207             | 1214.2 | 3.5 | frame                     | 11 | 61,033,693  | 61,035,064  | 18    | 65,256,909 | 65,257,787 |
| D1 | 39082488             | 1232.1 | 3.5 | frame                     | 11 | 61,016,671  | 61,018,788  | 18    | 65,268,040 | 65,270,321 |
| D1 | 38994420             | 1252.4 | 4.9 | frame                     | 11 | 60,773,993  | 60,774,057  | 18    | 65,482,941 | 65,481,436 |
| D1 | 39095427             | 1260.0 | 4.9 | frame                     | 11 | 64,962,322  | 64,965,032  | 18    | 62,109,983 | 62,112,094 |
| D1 | Fc.132216(XM_372411) | 1272.8 | 6.6 | frame                     | 11 | 68,432,317  | 68,432,386  | 18    | 59,439,487 | 59,439,990 |
| D1 | FCA943               | 1280.4 | 6.6 | frame                     | 11 | 69,025,753  | 69,025,837  | 18    | 58,982,228 | 58,981,861 |
| D1 | PGAS                 | 1283.1 | 1.3 | placed                    | 11 | 65,592,195  | 65,592,380  | 18    | 61,553,035 | 61,553,899 |
| D1 | FCA944               | 1285.8 | 2.9 | placed                    | 11 | 65,403,860  | 65,407,795  | 18    | 61,737,292 | 61,741,486 |
| D1 | IGHMBP2              | 1293.7 | 1.1 | frame                     | 11 | 62,138,294  | 62,138,566  | 18    | 64,385,408 | 64,386,088 |
| D1 | 39011591             | --     | --  | binnead [FCA943 - SF3B2]  | 11 | 2,550,650   | 2,550,794   | 18    | 56,947,190 | 56,959,004 |
| D1 | 39036248             | --     | --  | binnead [FCA943 - SF3B2]  | 11 | 999,681     | 999,817     | 18    | 55,695,952 | 55,697,270 |
| D1 | SF3B2                | 1307.0 | 1.1 | frame                     | 11 | 523,786     | 523,946     | 18    | 36,194,527 | 36,194,953 |
| D1 | GTSW                 | 1312.0 | 1.1 | placed                    | 11 |             |             |       |            |            |
| D1 | ROM1                 | 1325.0 | 0.8 | placed                    | 11 |             |             |       |            |            |
| D1 | KCNQ1                | 1356.5 | 2.1 | placed                    | 11 |             |             |       |            |            |
| D1 | AP2A2                | 1377.3 | 2.0 | frame                     | 11 |             |             |       |            |            |
| D1 | HRA5                 | 1394.9 | 2.0 | frame                     | 11 |             |             |       |            |            |

|    |                 |        |     |        |    |             |             |    |            |            |
|----|-----------------|--------|-----|--------|----|-------------|-------------|----|------------|------------|
| D2 | 38911684        | 0.0    | 9.8 | placed | 10 | 52,520,651  | 52,520,945  | 26 | 38,847,402 | 38,847,864 |
| D2 | FCA924          | 2.2    | 9.1 | placed | 10 | 51,863,153  | 51,863,323  | 26 | 39,350,871 | 39,351,154 |
| D2 | LG26_B03        | 9.1    | 7.8 | placed | 10 | 53,029,302  | 53,029,691  | 26 | 38,374,551 | 38,374,944 |
| D2 | 38114472        | 28.2   | 3.8 | placed | 10 | 38,168,456  | 38,168,683  | 4  | 3,168,942  | 3,168,588  |
| D2 | 39082533        | 34.9   | 2.9 | placed | 10 | 236,325,747 | 236,325,844 | 4  | 3,578,023  | 3,577,473  |
| D2 | CHRM3           | 37.2   | 4.1 | placed | 1  | 235,875,906 | 236,398,484 | 4  | 3,508,839  | 3,510,465  |
| D2 | FCA091          | 48.9   | 3.3 | frame  | 1  | 234,224,809 | 234,228,596 | 4  | 4,861,231  | 4,865,722  |
| D2 | FCA925          | 55.6   | 4.1 | placed | 1  | 233,531,742 | 234,322,694 | 4  | 4,912,531  | 4,913,135  |
| D2 | ZP4             | 60.1   | 3.3 | frame  | 1  | 234,377,751 | 234,379,976 | 4  | 5,326,341  | 5,332,925  |
| D2 | 38966117        | 71.5   | 2.5 | placed | 1  | 233,129,222 | 233,129,401 | 4  | 6,465,899  | 6,465,548  |
| D2 | LGALS8          | 76.0   | 7.2 | frame  | 1  | 233,037,422 | 233,037,565 | 4  | 6,550,595  | 6,551,092  |
| D2 | FCA262          | 100.2  | 2.8 | frame  | 1  | 231,710,913 | 231,711,060 | 4  | 7,708,035  | 7,708,194  |
| D2 | FCA926          | 114.2  | 1.6 | frame  | 1  | 229,538,307 | 229,701,826 | 4  | 9,543,837  | 9,546,015  |
| D2 | 39089548        | 125.8  | 1.6 | frame  | 1  | 229,455,080 | 229,455,259 | 4  | 9,688,160  | 9,688,439  |
| D2 | LG_10_H02       | 182.9  | 4.9 | placed | 1  | 226,533,019 | 226,533,336 | 4  | 12,235,412 | 12,238,743 |
| D2 | LG_20_68        | 224.9  | 1.8 | frame  | 1  | 225,913,028 | 225,913,506 | 4  | 12,792,673 | 12,793,189 |
| D2 | FCA462          | 242.3  | 1.8 | frame  | 1  | 225,600,494 | 225,600,641 | 4  | 13,067,472 | 13,067,601 |
| D2 | FCA946          | 279.5  | 0.2 | placed | 10 | 59,943,928  | 59,944,003  | 4  | 13,925,298 | 13,925,648 |
| D2 | FCA945          | 281.8  | 2.5 | frame  | 10 | 59,943,928  | 59,943,980  | 4  | 13,925,296 | 13,925,648 |
| D2 | FCA477          | 293.9  | 2.5 | frame  | 10 | 60,131,840  | 60,258,657  | 4  | 14,068,027 | 14,068,156 |
| D2 | 39036202        | 307.2  | 7.2 | frame  | 10 | 60,724,483  | 60,724,633  | 4  | 14,714,512 | 14,714,842 |
| D2 | EGR2            | 321.1  | 7.2 | frame  | 10 | 64,243,310  | 64,243,368  | 4  | 17,897,260 | 17,897,327 |
| D2 | FCA263          | 346.2  | 3.2 | placed | 10 | 65,452,444  | 65,452,626  | 4  | 18,900,030 | 18,900,501 |
| D2 | FCA081          | 380.9  | 7.5 | frame  | 10 | 66,427,247  | 66,427,256  | 4  | 19,486,010 | 19,486,092 |
| D2 | 39012557        | 413.5  | 8.2 | frame  | 10 | 69,352,219  | 69,352,904  | 4  | 22,414,389 | 22,415,121 |
| D2 | 39051935        | 434.4  | 4.1 | frame  | 10 | 72,948,799  | 72,949,055  | 4  | 25,482,165 | 25,491,863 |
| D2 | FCA948          | 442.2  | 4.1 | frame  | 10 | 72,049,207  | 72,049,276  | 4  | 24,712,096 | 24,712,225 |
| D2 | FCA947          | 456.0  | 5.7 | frame  | 10 | 71,326,200  | 71,326,729  | 4  | 24,127,701 | 24,128,179 |
| D2 | RBP3            | 488.7  | 6.8 | frame  | 10 | 48,009,721  | 48,010,695  | 4  | 38,177,136 | 38,178,285 |
| D2 | OPN4            | 505.6  | 2.1 | placed | 10 | 88,404,377  | 88,416,192  | 4  | 37,549,241 | 37,559,136 |
| D2 | FCA949          | 511.0  | 2.6 | frame  | 10 | 85,662,463  | 85,831,859  | 4  | 35,297,560 | 35,299,650 |
| D2 | FCA035          | 519.0  | 2.6 | frame  | 10 | 85,738,330  | 85,738,671  | 4  | 35,503,499 | 35,503,761 |
| D2 | VCL             | 526.9  | 2.6 | frame  | 10 | 75,427,928  | 75,549,783  | 4  | 27,609,892 | 27,723,759 |
| D2 | FCA951          | 529.5  | 3.8 | placed | 10 | 77,559,568  | 77,559,604  | 4  | 29,472,128 | 29,472,308 |
| D2 | 38967938        | 540.7  | 2.6 | frame  | 10 | 80,793,758  | 80,793,943  | 4  | 32,231,311 | 32,231,069 |
| D2 | FCA950          | 546.4  | 1.0 | placed | 10 | 82,272,588  | 82,272,749  | 4  | 32,843,312 | 32,843,780 |
| D2 | GHITM           | 563.4  | 4.2 | frame  | 10 | 85,900,459  | 85,900,610  | 4  | 35,619,600 | 35,621,362 |
| D2 | LG9-16_F07      | --     | --  | binned | 10 | 78,592,372  | 78,592,696  | 4  | 30,320,756 | 30,321,101 |
| D2 | PLAU            | 587.2  | 1.1 | frame  | 10 | 75,342,119  | 75,342,209  | 4  | 27,535,626 | 27,536,060 |
| D2 | FCA952          | 604.6  | 1.1 | frame  | 10 | 74,289,756  | 74,289,170  | 4  | 26,689,553 | 26,689,745 |
| D2 | FCA107          | 644.0  | 5.0 | frame  | 10 | 49,597,082  | 49,599,183  | 28 | 3,647,982  | 3,648,322  |
| D2 | CHAT            | 659.5  | 4.1 | frame  | 10 | 50,487,147  | 50,543,156  | 28 | 4,491,076  | 4,491,265  |
| D2 | FCA953          | 678.1  | 0.4 | placed | 10 | 104,172,997 | 104,182,343 | 28 | 10,649,983 | 10,650,060 |
| D2 | 38986264        | 683.1  | 2.0 | frame  | 10 | 94,202,299  | 94,203,000  | 28 | 9,854,614  | 9,855,336  |
| D2 | RET             | 690.6  | 2.0 | frame  | 10 | 42,892,518  | 42,945,799  | 28 | 6,958,681  | 6,983,546  |
| D2 | SDF1B           | 698.0  | 4.8 | placed | 10 | 44,196,220  | 44,196,326  | 28 | 5,904,140  | 5,911,754  |
| D2 | LG1_E10         | 703.2  | 8.1 | frame  | 10 | 44,116,212  | 44,117,137  | 28 | 5,979,352  | 5,979,989  |
| D2 | GOT1            | 723.7  | 0.7 | placed | 10 | 101,146,618 | 101,181,214 | 28 | 15,370,617 | 15,365,457 |
| D2 | LOC159291(TBG9) | 743.4  | 0.5 | placed | 10 | 99,524,855  | 99,614,043  | 28 | 14,091,557 | 14,098,789 |
| D2 | FCA557          | 748.8  | 3.5 | frame  | 10 | 99,517,989  | 99,518,311  | 28 | 14,013,706 | 14,014,293 |
| D2 | FCA078          | 754.4  | 3.2 | placed | 10 | 102,258,759 | 102,259,284 | 28 | 16,241,643 | 16,241,110 |
| D2 | 39019848        | 754.4  | 3.2 | placed | 10 | 102,260,826 | 102,260,871 | 28 | 16,243,092 | 16,243,966 |
| D2 | FCA957          | 757.2  | 2.5 | frame  | 10 | 104,582,273 | 104,582,421 | 28 | 18,308,562 | 18,309,830 |
| D2 | CYP17           | 768.4  | 3.7 | frame  | 10 | 105,871,806 | 105,876,131 | 28 | 19,456,756 | 19,457,237 |
| D2 | LOC119392       | 790.5  | 3.1 | frame  | 10 | 103,040,211 | 103,040,816 | 28 | 16,936,229 | 16,936,693 |
| D2 | LG35_D11        | 804.0  | 3.1 | frame  | 10 | 105,351,564 | 105,351,110 | 28 | 18,985,733 | 18,985,810 |
| D2 | FCA956          | 818.0  | 5.7 | frame  | 10 | 109,516,885 | 109,517,057 | 28 | 21,803,468 | 21,803,786 |
| D2 | FCA955          | 835.2  | 0.2 | placed | 10 | 106,049,967 | 106,050,130 | 28 | 19,622,906 | 19,623,259 |
| D2 | 39085051        | 840.7  | 2.1 | frame  | 10 | 109,387,646 | 109,388,095 | 28 | 22,502,777 | 22,503,272 |
| D2 | LG9-15_D03      | 849.3  | 1.7 | frame  | 10 | 111,305,345 | 111,305,367 | 28 | 8,575,684  | 8,575,924  |
| D2 | FCA366          | 860.8  | 1.7 | frame  | 10 | 112,409,945 | 112,409,996 | 28 | 25,023,233 | 25,023,488 |
| D2 | 39017394        | 904.4  | 2.3 | frame  | 10 | 114,372,954 | 114,373,119 | 28 | 26,696,950 | 26,697,289 |
| D2 | FCA668          | 915.1  | 1.2 | frame  | 10 | 112,828,180 | 112,828,293 | 28 | 25,404,033 | 25,404,148 |
| D2 | ADRA2A          | 929.1  | 0.7 | placed | 10 | 118,599,018 | 118,632,012 | 28 | 30,375,570 | 30,375,989 |
| D2 | LG_19_81        | 937.2  | 1.2 | frame  | 10 | 118,588,972 | 118,589,623 | 28 | 30,422,124 | 30,422,709 |
| D2 | ADRB1           | 945.3  | 1.9 | frame  | 10 | 115,793,882 | 115,794,679 | 28 | 27,945,557 | 27,947,007 |
| D2 | LG_18_30        | 964.5  | 5.3 | frame  | 10 | 114,467,243 | 114,467,817 | 28 | 26,782,559 | 26,783,026 |
| D2 | F41             | 1003.2 | 6.5 | frame  | 10 | 122,317,923 | 122,320,296 | 28 | 33,596,344 | 33,600,383 |
| D2 | BUB3            | 1032.7 | 5.8 | frame  | 10 | 124,903,877 | 124,914,869 | 28 | 35,714,515 | 35,798,963 |
| D2 | TRABID          | --     | --  | binned | 10 | 126,663,313 | 126,663,554 | 28 | 37,276,163 | 37,276,649 |
| D2 | OAT             | 1047.4 | 5.4 | frame  | 10 | 126,075,862 | 126,097,509 | 28 | 36,785,467 | 36,801,559 |
| D2 | LG30_A10        | 1059.7 | 5.4 | frame  | 10 | 127,981,894 | 127,982,311 | 28 | 38,436,775 | 38,437,204 |
| D2 | 39012579        | 1059.7 | 2.5 | placed | 10 | 128,143,241 | 128,143,393 | 28 | 38,555,230 | 38,555,635 |
| D2 | LG21_E11        | 1072.4 | 3.2 | frame  | 10 | 129,654,726 | 129,656,647 | 28 | 39,810,086 | 39,811,517 |
| D2 | 39006872        | 1084.7 | 3.2 | frame  | 10 | 132,850,849 | 132,850,942 | 28 | 42,472,314 | 42,474,493 |

|    |            |        |     |                             |
|----|------------|--------|-----|-----------------------------|
| D3 | 38988695   | 0.0    | 0.9 | frame                       |
| D3 | CHFR       | 41.5   | 0.9 | frame                       |
| D3 | FCA959     | 75.3   | 7.4 | frame                       |
| D3 | FCA137     | 90.2   | 1.5 | placed                      |
| D3 | 39011701   | 99.9   | 6.0 | frame                       |
| D3 | 39084907   | 106.8  | 6.0 | frame                       |
| D3 | MAPKAPKS   | 126.3  | 2.8 | frame                       |
| D3 | ATP2A2     | 140.5  | 2.8 | frame                       |
| D3 | ALDH2      | 159.7  | 7.6 | frame                       |
| D3 | FL114827   | 178.6  | 7.6 | frame                       |
| D3 | 39083183   | 194.9  | 2.2 | frame                       |
| D3 | PBP        | 201.5  | 2.2 | frame                       |
| D3 | TCF1       | 215.5  | 6.8 | frame                       |
| D3 | 39041783   | 237.3  | 2.3 | frame                       |
| D3 | FCA200     | 251.3  | 2.3 | frame                       |
| D3 | FCA523     | 262.8  | 5.6 | frame                       |
| D3 | IGLC6      | 265.1  | 3.4 | placed                      |
| D3 | GNAZ       | 279.4  | 5.8 | frame                       |
| D3 | SLC5A1     | 300.9  | 2.2 | frame                       |
| D3 | FCA249     | 317.3  | 2.0 | frame                       |
| D3 | LG30_E12   | 328.7  | 4.5 | frame                       |
| D3 | LG34_A07   | 337.9  | 2.5 | frame                       |
| D3 | 39029426   | 340.1  | 0.2 | placed                      |
| D3 | FCA961     | 344.6  | 2.5 | frame                       |
| D3 | 39006550   | 353.6  | 2.3 | placed                      |
| D3 | FCA960     | 355.8  | 4.9 | frame                       |
| D3 | LG_20.19   | 374.6  | 6.6 | frame                       |
| D3 | 39006741   | 425.7  | 2.9 | frame                       |
| D3 | SLC25A1    | 432.9  | 2.9 | frame                       |
| D3 | FCA026     | 463.3  | 5.0 | frame                       |
| D3 | LG_18.83   | 463.3  | 5.0 | frame                       |
| D3 | 38995493   | 484.5  | 5.0 | frame                       |
| D3 | FCA964     | 541.8  | 1.9 | placed                      |
| D3 | FCA963     | 579.5  | 0.9 | frame                       |
| D3 | LG9-13_G11 | 604.4  | 0.9 | frame                       |
| D3 | LAMA1      | 618.7  | 0.9 | frame                       |
| D3 | FCA968     | 635.3  | 7.1 | frame                       |
| D3 | FCA962     | 657.1  | 1.4 | frame                       |
| D3 | FCA132     | 671.0  | 1.4 | frame                       |
| D3 | FCA969     | 680.2  | 1.4 | frame                       |
| D3 | FCA066     | 696.5  | 4.8 | frame                       |
| D3 | NPC1       | 718.4  | 5.8 | frame                       |
| D3 | 38970733   | 738.2  | 3.5 | frame                       |
| D3 | TYMS       | 757.6  | 2.5 | frame                       |
| D3 | FCA675     | 782.1  | 3.7 | frame                       |
| D3 | CDH2       | 809.4  | 3.7 | frame                       |
| D3 | 39025040   | 846.1  | 3.1 | frame                       |
| D3 | 39063491   | 865.8  | 2.7 | frame                       |
| D3 | LG_17.31   | 893.6  | 2.0 | frame                       |
| D3 | LG9-16_A03 | --     | --  | binmed [LG_17.31 - FCA603]  |
| D3 | 39063649   | 924.4  | 2.3 | frame                       |
| D3 | LG5_H10M   | 931.5  | 1.0 | placed                      |
| D3 | FCA603     | 940.8  | 2.3 | frame                       |
| D3 | 39063525   | 968.4  | 4.6 | frame                       |
| D3 | FCA969     | 994.9  | 3.4 | placed                      |
| D3 | LG_19.52   | 1027.3 | 3.9 | frame                       |
| D3 | LG24_F12   | 1051.8 | 4.4 | frame                       |
| D3 | LG34_B07   | 1065.8 | 1.1 | frame                       |
| D3 | 39063129   | 1072.7 | 1.1 | frame                       |
| D3 | RD114-8H   | 1084.4 | 1.6 | frame                       |
| D3 | MC4R       | 1091.5 | 1.4 | placed                      |
| D3 | FCA221     | 1098.5 | 2.1 | frame                       |
| D3 | LG33_A11   | 1110.1 | 2.1 | frame                       |
| D3 | BCL2       | 1117.0 | 0.3 | placed                      |
| D3 | 38974461   | 1142.0 | 3.4 | frame                       |
| D3 | FCA277     | 1156.1 | 4.3 | frame                       |
| D3 | FCA971     | 1165.5 | 4.3 | frame                       |
| D3 | LG23_H09   | 1177.7 | 4.4 | frame                       |
| D3 | LG30_A11   | 1198.1 | 6.3 | frame                       |
| D3 | LG33_B02_M | 1207.7 | 6.3 | frame                       |
| D3 | FCA970     | 1219.7 | 7.9 | frame                       |
| D3 | HSPC154    | 1233.9 | 4.1 | frame                       |
| D3 | LG9-14_C08 | 1268.4 | 1.4 | frame                       |
| D3 | 39085096   | --     | --  | binmed [HSPC154 - LG35_D05] |
| D3 | LG35_D05   | 1280.1 | 1.4 | frame                       |
| D3 | 39078552   | 1292.1 | 3.6 | placed                      |
| D3 | FCA623     | 1312.9 | 1.2 | placed                      |
| D3 | MAN2A2     | 1351.2 | 3.2 | frame                       |

|    |             |             |    |            |            |
|----|-------------|-------------|----|------------|------------|
| 12 | 126,285,800 | 126,285,992 | 26 | 5,704,817  | 5,704,591  |
| 12 | 132,027,861 | 132,027,997 | 26 | 3,327,586  | 3,328,037  |
| 12 | 124,265,221 | 124,265,404 | 26 | 7,919,370  | 7,919,516  |
| 12 | 123,809,537 | 123,809,675 | 26 | 8,275,659  | 8,275,819  |
| 12 | 121,251,799 | 121,251,912 | 26 | 10,289,843 | 10,289,573 |
| 12 | 110,789,408 | 110,789,544 | 26 | 12,594,258 | 12,594,659 |
| 12 | 109,228,081 | 109,228,542 | 26 | 11,326,085 | 11,386,887 |
| 12 | 110,691,020 | 110,691,127 | 26 | 12,518,995 | 12,519,106 |
| 12 | 112,092,703 | 112,092,748 | 26 | 13,733,951 | 13,734,238 |
| 12 | 115,645,182 | 115,645,369 | 26 | 16,580,063 | 16,580,404 |
| 12 | 117,036,643 | 117,046,107 | 26 | 17,692,578 | 17,692,904 |
| 12 | 119,894,163 | 119,894,280 | 26 | 19,988,655 | 19,988,900 |
| 22 | 23,341,456  | 23,341,611  | 26 | 30,351,231 | 30,351,058 |
| 22 | 23,160,148  | 23,160,148  | 26 | 30,189,594 | 30,189,618 |
| 22 | 30,805,118  | 30,805,561  | 26 | 29,721,277 | 29,721,386 |
| 22 | 21,580,600  | 21,580,700  | 26 | 28,999,635 | 29,661,798 |
| 22 | 21,737,226  | 21,791,772  | 26 | 29,823,338 | 29,853,246 |
| 22 | 30,805,020  | 30,805,173  | 26 | 28,071,943 | 28,071,213 |
| 22 | 30,553,857  | 30,553,981  | 26 | 27,833,741 | 27,834,063 |
| 22 | 28,775,035  | 28,775,411  | 26 | 26,364,398 | 26,364,774 |
| 22 | 28,106,245  | 28,106,963  | 26 | 25,824,958 | 25,825,752 |
| 22 | 28,449,586  | 28,449,743  | 26 | 26,062,149 | 26,061,882 |
| 22 | 27,679,916  | 27,682,851  | 26 | 25,442,449 | 25,451,935 |
| 22 | 26,860,781  | 26,860,982  | 26 | 24,712,111 | 24,712,786 |
| 22 | 26,790,912  | 26,798,995  | 26 | 24,651,189 | 24,659,276 |
| 22 | 25,387,329  | 25,388,066  | 26 | 23,439,964 | 23,440,562 |
| 22 | 18,645,917  | 18,645,981  | 26 | 31,092,792 | 31,092,159 |
| 22 | 17,537,649  | 17,540,897  | 26 | 32,021,910 | 32,022,205 |
| 18 | 44,419,169  | 44,419,234  | 7  | 82,461,904 | 82,462,021 |
| 18 | 12,756,414  | 12,756,670  | 7  | 80,629,190 | 80,629,661 |
| 18 | 10,883,002  | 10,883,228  | 7  | 79,162,426 | 79,162,083 |
| 18 | 10,111,790  | 10,112,121  | 7  | 78,531,049 | 78,531,481 |
| 18 | 7,741,169   | 7,743,232   | 7  | 76,455,268 | 76,455,645 |
| 18 | 7,906,283   | 7,906,441   | 7  | 76,622,919 | 76,623,668 |
| 18 | 6,933,218   | 6,933,400   | 7  | 75,781,553 | 75,784,209 |
| 18 | 5,456,474   | 5,456,676   | 7  | 74,918,038 | 74,918,236 |
| 18 | 2,017,125   | 2,020,398   | 7  | 71,152,732 | 71,154,887 |
| 18 | 3,893,780   | 3,893,860   | 7  | 72,899,370 | 72,899,587 |
| 18 | 4,119,715   | 4,120,953   | 7  | 73,118,062 | 73,119,107 |
| 18 | 19,365,461  | 19,420,399  | 7  | 67,230,249 | 67,268,124 |
| 18 | 19,134,507  | 19,134,735  | 7  | 67,443,731 | 67,444,201 |
| 18 | 660,757     | 660,845     | 7  | 69,966,805 | 69,967,232 |
| 18 | 20,146,046  | 20,146,110  | 7  | 66,618,613 | 66,618,696 |
| 18 | 23,766,840  | 24,011,406  | 7  | 63,422,818 | 63,606,208 |
| 18 | 28,141,838  | 28,142,005  | 7  | 60,012,146 | 60,011,960 |
| 18 | 36,199,411  | 36,199,612  | 7  | 52,897,403 | 52,897,181 |
| 18 | 30,845,178  | 30,845,481  | 7  | 57,596,115 | 57,596,417 |
| 18 | 39,160,934  | 39,163,457  | 7  | 50,129,116 | 50,131,240 |
| 18 | 40,423,851  | 40,423,927  | 7  | 49,103,913 | 49,103,706 |
| 18 | 43,675,182  | 43,675,883  | 7  | 46,337,914 | 46,338,663 |
| 18 | 42,663,688  | 42,677,394  | 7  | 47,130,840 | 47,139,992 |
| 18 | 48,592,407  | 48,592,527  | 1  | 25,376,983 | 25,376,676 |
| 18 | 52,231,113  | 52,232,161  | 1  | 22,244,308 | 22,244,555 |
| 18 | 53,544,668  | 53,545,534  | 1  | 21,123,133 | 21,123,526 |
| 18 | 54,105,708  | 54,106,194  | 1  | 20,632,428 | 20,633,188 |
| 18 | 54,737,100  | 54,737,922  | 1  | 20,103,809 | 20,103,016 |
| 18 | 56,189,564  | 56,190,562  | 1  | 19,024,819 | 19,025,797 |
| 18 | 57,147,279  | 57,147,618  | 1  | 18,283,650 | 18,283,901 |
| 18 | 59,296,850  | 59,297,596  | 1  | 16,474,628 | 16,475,058 |
| 18 | 58,941,568  | 59,136,910  | 1  | 16,625,147 | 16,791,057 |
| 18 | 61,736,052  | 61,736,274  | 1  | 14,555,088 | 14,554,798 |
| 18 | 62,999,668  | 62,999,811  | 1  | 13,493,490 | 13,493,843 |
| 18 | 64,674,462  | 64,674,842  | 1  | 12,156,425 | 12,156,486 |
| 18 | 65,660,016  | 65,660,563  | 1  | 11,330,931 | 11,331,483 |
| 18 | 70,012,499  | 70,012,609  | 1  | 8,023,562  | 8,023,967  |
| 18 | 68,204,368  | 68,204,455  | 1  | 9,368,853  | 9,369,401  |
| 18 | 68,272,611  | 68,272,991  | 1  | 9,325,035  | 9,325,297  |
| 18 | 69,976,405  | 69,976,469  | 1  | 8,048,094  | 8,048,856  |
| 18 | 71,229,891  | 71,230,535  | 1  | 7,009,645  | 7,010,326  |
| 18 | 71,349,057  | 71,349,231  | 1  | 6,803,741  | 6,803,481  |
| 18 | 72,291,382  | 72,291,626  | 1  | 6,184,203  | 6,186,440  |
| 18 | 74,655,500  | 74,655,701  | 1  | 4,422,958  | 4,422,726  |
| 18 | 72,047,200  | 72,061,560  | 1  | 6,352,129  | 6,366,113  |
| 18 | 42,029,897  | 42,040,082  | 7  | 47,667,028 | 47,669,232 |

|    |            |        |      |         |   |             |             |    |             |             |
|----|------------|--------|------|---------|---|-------------|-------------|----|-------------|-------------|
| D4 | LG9-13_B01 | 0.0    | 5.1  | frame   | 9 | 69,219,639  | 69,219,669  | 1  | 90,673,355  | 90,673,894  |
| D4 | LG25_F09   | --     | --   | blinded | 9 | 95,900,664  | 96,002,672  | 1  | 102,000,652 | 102,000,915 |
| D4 | LG2_B07    | 40.4   | 1.4  | placed  | 9 | 1,931,781   | 1,932,163   | 1  | 93,292,870  | 93,293,250  |
| D4 | 38986218   | 45.1   | 6.0  | frame   | 9 | 2,085,709   | 2,085,866   | 1  | 93,439,893  | 93,439,411  |
| D4 | LG5_B11    | 50.0   | 2.0  | placed  | 9 | 2,862,893   | 2,863,619   | 1  | 94,126,205  | 94,126,495  |
| D4 | 38968151   | 65.2   | 2.4  | frame   | 9 | 3,668,776   | 3,668,844   | 1  | 94,816,381  | 94,816,470  |
| D4 | 39015114   | 72.1   | 2.3  | frame   | 9 | 71,508,855  | 71,508,972  | 1  | 88,694,419  | 88,693,940  |
| D4 | LG_17_10   | 79.1   | 2.3  | frame   | 9 | 76,081,431  | 76,083,552  | 1  | 84,835,192  | 84,835,525  |
| D4 | FCA641     | 103.9  | 4.4  | frame   | 9 | 79,505,523  | 79,517,680  | 1  | 81,821,370  | 81,836,605  |
| D4 | 39014295   | 120.2  | 4.4  | frame   | 9 | 79,225,629  | 79,225,718  | 1  | 82,073,964  | 82,073,215  |
| D4 | 38968072   | 138.9  | 3.4  | frame   | 9 | 82,264,079  | 82,264,297  | 1  | 79,622,765  | 79,622,507  |
| D4 | 39079389   | 155.2  | 3.4  | frame   | 9 | 85,222,337  | 85,222,627  | 1  | 76,940,380  | 76,940,108  |
| D4 | 38967884   | 207.6  | 10.3 | placed  | 9 | 5,959,231   | 5,959,464   | 11 | 28,365,771  | 28,366,008  |
| D4 | FCA742     | 266.0  | 4.8  | frame   | 9 | 8,007,100   | 8,010,485   | 11 | 30,260,054  | 30,264,371  |
| D4 | lg9-15_c02 | 282.5  | 4.3  | frame   | 9 | 8,848,867   | 8,850,010   | 11 | 31,009,930  | 31,010,063  |
| D4 | LG_18_46   | 294.1  | 4.3  | frame   | 9 | 9,631,057   | 9,632,969   | 11 | 31,746,166  | 31,746,940  |
| D4 | FCA743     | 308.1  | 3.0  | frame   | 9 | 10,192,351  | 10,194,104  | 11 | 32,274,736  | 32,276,815  |
| D4 | FCA744     | 319.8  | 3.0  | frame   | 7 | 134,526,257 | 134,527,052 | 16 | 5,085,382   | 5,087,563   |
| D4 | FCA976     | 411.8  | 9.0  | frame   | 9 | 13,952,172  | 13,952,288  | 11 | 35,863,085  | 35,863,342  |
| D4 | IFN1       | 450.4  | 0.6  | frame   | 9 | 21,340,464  | 21,340,533  | 11 | 42,078,668  | 42,078,907  |
| D4 | IFN1       | 458.1  | 0.6  | frame   | 9 | 21,067,766  | 21,067,852  | 11 | 42,018,201  | 42,018,514  |
| D4 | CDKN2B     | 480.9  | 7.8  | frame   | 9 | 21,995,985  | 21,999,271  | 11 | 42,615,242  | 42,620,557  |
| D4 | 39036257   | 510.7  | 2.4  | frame   | 9 | 26,396,476  | 26,396,765  | 11 | 46,075,232  | 46,074,931  |
| D4 | LG_19_38   | 521.6  | 2.4  | frame   | 9 | 26,553,184  | 26,553,633  | 11 | 46,199,965  | 46,200,406  |
| D4 | FCA618     | 535.3  | 6.0  | frame   | 9 | 27,317,022  | 27,317,703  | 11 | 46,812,137  | 46,813,387  |
| D4 | FCA030     | 557.6  | 1.8  | frame   | 9 | 28,798,622  | 28,798,690  | 11 | 48,113,846  | 48,114,094  |
| D4 | FCA975     | 583.6  | 3.5  | frame   | 9 | 32,447,130  | 32,516,113  | 11 | 50,127,677  | 50,127,881  |
| D4 | VCP        | 628.5  | 3.7  | frame   | 9 | 35,062,337  | 35,062,502  | 11 | 52,996,079  | 53,000,355  |
| D4 | KIAA0258   | 643.3  | 3.7  | frame   | 9 | 35,743,646  | 35,743,803  | 11 | 53,629,245  | 53,629,628  |
| D4 | FCA242     | 664.7  | 2.7  | frame   | 9 | 37,116,333  | 37,344,795  | 11 | 55,052,253  | 55,052,528  |
| D4 | LOC259308  | 678.0  | 2.2  | frame   | 9 | 34,710,299  | 34,710,359  | 11 | 52,742,586  | 52,788,393  |
| D4 | FCA974     | 685.8  | 2.2  | frame   | 9 | 34,059,149  | 34,060,785  | 11 | 52,185,189  | 52,185,352  |
| D4 | CNTFR      | 703.4  | 6.3  | frame   | 9 | 34,863,643  | 34,902,332  | 11 | 52,585,338  | 52,585,642  |
| D4 | 39077294   | 733.4  | 4.9  | frame   | 9 | 99,208,009  | 99,208,507  | 11 | 57,749,242  | 57,748,602  |
| D4 | 38995335   | 756.2  | 3.9  | placed  | 9 | 103,943,761 | 103,943,972 | 11 | 61,468,035  | 61,468,308  |
| D4 | FCA985     | 762.1  | 5.4  | frame   | 9 | 104,755,981 | 104,810,168 | 11 | 62,276,704  | 62,277,295  |
| D4 | FCA134     | 780.3  | 4.7  | frame   | 9 | 110,041,454 | 110,059,699 | 11 | 66,567,814  | 66,579,623  |
| D4 | TXN        | 789.0  | 4.7  | frame   | 9 | 110,085,856 | 110,098,342 | 11 | 66,608,525  | 66,608,777  |
| D4 | 38988227   | 798.4  | 4.7  | frame   | 9 | 111,124,824 | 111,125,042 | 11 | 67,374,252  | 67,373,861  |
| D4 | AMBP       | 814.1  | 2.1  | frame   | 9 | 113,901,964 | 113,920,269 | 11 | 69,719,066  | 69,732,164  |
| D4 | 461        | 836.7  | 2.1  | frame   | 9 | 116,465,450 | 116,465,886 | 11 | 71,782,556  | 71,783,022  |
| D4 | FCA746     | 870.3  | 2.4  | frame   | 9 | 115,310,914 | 115,314,260 | 11 | 70,829,068  | 70,832,100  |
| D4 | FCA650     | 887.8  | 2.4  | frame   | 9 | 116,028,987 | 116,224,322 | 11 | 71,370,648  | 71,370,807  |
| D4 | TLR4       | 903.3  | 4.4  | frame   | 9 | 117,555,905 | 117,556,417 | 11 | 72,735,520  | 72,746,301  |
| D4 | LG35_B12   | 919.5  | 5.1  | frame   | 9 | 117,718,288 | 117,719,081 | 11 | 72,904,504  | 72,904,942  |
| D4 | DBCRC1     | 935.1  | 5.1  | frame   | 9 | 119,008,462 | 119,211,281 | 11 | 74,009,733  | 74,128,918  |
| D4 | FCA984     | 955.0  | 2.6  | placed  | 9 | 121,038,859 | 121,039,909 | 11 | 75,559,881  | 75,560,033  |
| D4 | GGTA1      | 961.4  | 1.4  | placed  | 9 | 121,288,745 | 121,309,754 | 9  | 53,589,422  | 53,609,344  |
| D4 | FCA045     | 961.4  | 6.3  | frame   | 9 | 125,078,439 | 125,082,903 | 9  | 50,414,701  | 50,419,314  |
| D4 | HSPA5      | 970.6  | 6.3  | frame   | 9 | 127,573,867 | 127,577,103 | 9  | 48,208,907  | 48,232,164  |
| D4 | FCA983     | 983.5  | 4.3  | frame   | 9 | 127,557,912 | 127,573,433 | 9  | 48,227,378  | 48,240,213  |
| D4 | Fc.178009  | 1004.5 | 4.3  | frame   | 9 | 128,944,234 | 128,944,400 | 9  | 47,136,137  | 47,138,306  |
| D4 | CRAT       | 1030.1 | 5.6  | frame   | 9 | 128,005,372 | 128,005,753 | 9  | 47,883,125  | 47,883,501  |
| D4 | FCA978     | 1050.5 | 3.4  | frame   | 9 | 133,052,674 | 133,053,127 | 9  | 43,845,286  | 43,846,716  |
| D4 | FCA977     | 1068.4 | 3.4  | frame   | 9 | 135,680,086 | 135,680,219 | 9  | 42,209,150  | 42,211,170  |
| D4 | FCA980     | 1095.4 | 0.8  | frame   | 9 | 133,089,894 | 133,097,276 | 9  | 42,272,799  | 42,289,809  |
| D4 | FCA979     | 1109.4 | 0.2  | placed  | 9 | 135,622,950 | 135,625,878 | 9  | 43,798,598  | 43,800,745  |
| D4 | LG31_B05   | 1114.9 | 2.4  | frame   | 9 | 133,257,894 | 133,272,524 | 9  | 42,339,154  | 42,345,653  |
| D4 | SURF4      | 1129.8 | 1.9  | frame   | 9 | 135,213,652 | 135,237,969 | 9  | 43,462,491  | 43,462,513  |
| D4 | FCA982     | 1145.2 | 2.2  | frame   | 9 | 137,149,280 | 137,149,422 | 9  | 41,187,491  | 41,190,745  |
| D4 | PTGDS      | 1155.1 | 2.2  | frame   | 9 | 137,772,306 | 137,773,420 | 9  | 40,713,872  | 40,714,523  |
| D4 | LG30_D06   | 1155.1 | 0.4  | placed  | 9 | 133,013,515 | 133,013,639 | 9  | 42,272,810  | 42,273,434  |
| D4 | LG9-14_F10 | 1155.1 | 0.2  | placed  | 9 | 135,679,587 | 135,684,587 | 9  | 42,216,671  | 42,234,121  |
| D4 | PAEP       | 1164.9 | 1.0  | frame   | 9 |             |             |    |             |             |

|    |              |        |      |                      |    |             |             |    |            |            |
|----|--------------|--------|------|----------------------|----|-------------|-------------|----|------------|------------|
| E1 | LG34_F07     | 0.0    | 4.7  | frame                | 17 | 13,585,125  | 13,585,476  | 5  | 40,569,617 | 40,560,188 |
| E1 | LG34_E09     | 13.3   | 1.5  | placed               | 17 | 10,967,611  | 10,968,117  | 5  | 38,290,716 | 38,291,203 |
| E1 | LG9-14_H01   | 23.9   | 1.5  | frame                | 17 | 13,893,763  | 13,894,762  | 5  | 40,820,668 | 40,821,077 |
| E1 | FCA987       | 34.1   | 1.5  | frame                | 17 | 14,425,344  | 14,425,522  | 5  | 41,232,317 | 41,232,788 |
| E1 | FCA986       | 61.0   | 4.3  | placed               | 17 | 14,248,137  | 14,248,220  | 5  | 41,103,600 | 41,103,975 |
| E1 | RCV1         | 98.1   | 1.2  | placed               | 17 | 9,741,752   | 9,749,409   | 5  | 37,294,618 | 37,301,424 |
| E1 | UBB          | 128.0  | 0.9  | placed               | 17 | 16,224,870  | 16,233,604  | 5  | 42,517,533 | 42,518,621 |
| E1 | ULK2         | 138.2  | 2.0  | placed               | 17 | 19,620,060  | 19,620,178  | 5  | 43,415,116 | 43,416,370 |
| E1 | 39082591     | 153.7  | 5.0  | frame                | 17 | 21,854,940  | 21,855,584  | 5  | 42,517,853 | 42,518,586 |
| E1 | 39062353     | 177.9  | 0.1  | placed               | 17 | 21,028,272  | 21,028,379  | 5  | 45,640,893 | 45,641,106 |
| E1 | LG9-14_G04   | 180.3  | 5.0  | frame                | 17 | 21,113,509  | 21,113,695  | 5  | 45,701,437 | 45,701,633 |
| E1 | PEMT         | 195.8  | 5.0  | frame                | 17 | 17,356,633  | 17,356,694  | 5  | 44,923,997 | 44,936,092 |
| E1 | FCA140       | 211.5  | 2.9  | placed               | 17 | 19,127,020  | 19,178,160  | 5  | 43,959,033 | 43,959,106 |
| E1 | TP53         | 255.5  | 3.5  | placed               | 17 | 7,518,225   | 7,518,335   | 5  | 35,551,643 | 35,545,095 |
| E1 | FCA988       | 360.3  | 4.4  | frame                | 17 | 2,704,040   | 2,881,042   | 9  | 39,544,366 | 39,544,587 |
| E1 | ITGAE(CD103) | 374.2  | 2.4  | frame                | 17 | 3,564,671   | 3,651,286   | 9  | 40,139,163 | 40,202,283 |
| E1 | HIC1         | 383.2  | 2.4  | frame                | 17 | 1,909,500   | 1,909,734   | 9  | 38,765,829 | 38,766,139 |
| E1 | PITPN        | 394.6  | 1.0  | placed               | 17 | 1,369,318   | 1,412,851   | 9  | 38,285,767 | 38,326,927 |
| E1 | CRK          | 396.8  | 6.9  | frame                | 17 | 1,271,825   | 1,272,127   | 9  | 38,200,116 | 38,229,317 |
| E1 | SLO6A4?      | 418.2  | 12.5 | frame                | 17 | 25,549,056  | 25,573,174  | 9  | 36,826,458 | 36,848,276 |
| E1 | LG4_A04      | 427.3  | 0.1  | placed               | 17 | 25,411,216  | 25,411,294  | 9  | 36,703,826 | 36,704,026 |
| E1 | CRYBA1       | 457.3  | 3.4  | frame                | 17 | 24,598,000  | 24,605,626  | 9  | 35,979,593 | 35,979,776 |
| E1 | F124         | 466.6  | 3.4  | frame                | 17 | 24,734,942  | 24,738,574  | 9  | 36,088,500 | 36,096,104 |
| E1 | 38911667     | 496.0  | 0.8  | frame                | 21 | 27,197,151  | 27,204,155  | 31 | 25,242,326 | 25,242,725 |
| E1 | PROCA1       | 528.1  | 0.8  | frame                | 17 | 24,054,617  | 24,063,008  | 9  | 35,500,007 | 35,501,395 |
| E1 | NF1          | 553.0  | 6.9  | frame                | 17 | 26,583,965  | 26,584,292  | 9  | 34,210,681 | 34,210,995 |
| E1 | Fc.8179      | 572.8  | 6.9  | frame                | 17 | 27,203,259  | 27,203,306  | 9  | 33,699,910 | 33,700,192 |
| E1 | Fc.3447      | 593.9  | 6.7  | frame                | 17 | 28,348,925  | 28,348,992  | 9  | 32,690,281 | 32,693,348 |
| E1 | FCA005       | 613.8  | 6.7  | frame                | 17 | 29,001,738  | 29,004,979  | 9  | 32,089,358 | 32,089,542 |
| E1 | 39030013     | 643.0  | 0.3  | frame                | 17 | 20,283,056  | 20,283,181  | 9  | 30,158,268 | 30,158,833 |
| E1 | CCL5         | 657.8  | 4.1  | frame                | 17 | 31,222,639  | 31,231,443  | 9  | 30,413,390 | 30,419,589 |
| E1 | FCA989       | 672.2  | 4.1  | frame                | 17 | 29,780,790  | 29,781,158  | 9  | 31,470,365 | 31,470,753 |
| E1 | FCA082       | 780.8  | 0.8  | placed               | 17 | 56,665,187  | 56,665,286  | 9  | 27,984,662 | 27,984,946 |
| E1 | 39060241     | 786.4  | 2.6  | frame                | 17 | 56,820,673  | 56,820,762  | 9  | 27,852,614 | 27,852,384 |
| E1 | SUP74H1      | 794.9  | 2.6  | frame                | 17 | 53,784,374  | 53,784,486  | 9  | 25,589,664 | 25,589,365 |
| E1 | MTMR4        | 797.7  | 0.3  | placed               | 17 | 53,922,820  | 53,923,071  | 9  | 25,705,460 | 25,705,851 |
| E1 | LG6_E10M     | 819.4  | 5.6  | frame                | 17 | 52,872,774  | 52,873,041  | 9  | 24,778,693 | 24,778,995 |
| E1 | FCA050       | 857.2  | 3.4  | placed               |    |             |             |    |            |            |
| E1 | LG3_B06      | 876.3  | 2.0  | placed               | 17 | 52,098,123  | 52,098,513  | 9  | 24,118,608 | 24,118,977 |
| E1 | LG9-14_G02   | 906.6  | 0.4  | placed               | 17 | 49,343,303  | 49,343,855  | 9  | 21,943,889 | 21,944,360 |
| E1 | 39063602     | 924.2  | 3.4  | frame                | 17 | 50,749,060  | 50,749,148  | 9  | 23,034,228 | 23,034,316 |
| E1 | FCA567       | 945.0  | 3.4  | frame                | 17 | 47,065,836  | 47,363,726  | 9  | 20,143,665 | 20,150,424 |
| E1 | HOXB         | 972.7  | 5.2  | frame                | 17 | 43,961,645  | 44,047,559  | 9  | 17,454,967 | 17,456,394 |
| E1 | 39063378     | 975.3  | 2.1  | placed               | 17 | 43,481,002  | 43,481,234  | 9  | 17,007,747 | 17,007,177 |
| E1 | FCA992       | 988.7  | 5.2  | frame                | 17 | 33,943,058  | 34,064,853  | 9  | 16,282,750 | 16,283,063 |
| E1 | 38994228     | 1010.7 | 4.2  | placed               | 17 | 45,802,378  | 45,802,477  | 9  | 19,001,266 | 19,000,985 |
| E1 | SGCA         | 1018.5 | 2.2  | placed               | 17 | 45,603,794  | 45,603,931  | 9  | 18,831,115 | 18,831,519 |
| E1 | CSF3         | 1032.2 | 6.3  | placed               | 17 | 35,425,469  | 35,425,624  | 9  | 15,192,204 | 15,194,072 |
| E1 | STAT5B       | 1040.0 | 2.2  | placed               | 17 | 37,607,166  | 37,607,408  | 9  | 13,372,182 | 13,373,613 |
| E1 | FCA298       | 1042.5 | 3.3  | placed               | 17 | 37,942,932  | 37,970,055  | 9  | 13,055,369 | 13,073,871 |
| E1 | FCA990       | 1050.6 | 0.4  | placed               | 17 | 37,664,520  | 37,665,820  | 9  | 13,325,113 | 13,325,596 |
| E1 | LG27_C10     | 1058.5 | 0.2  | placed               | 17 | 38,037,838  | 38,038,713  | 9  | 12,998,212 | 12,999,311 |
| E1 | BRCA1        | 1061.0 | 6.1  | frame                | 17 | 38,498,874  | 38,500,243  | 9  | 12,641,825 | 12,644,675 |
| E1 | FLJ31795     | --     | --   | binmed [BRCA1 - GHJ] | 17 | 40,111,446  | 40,111,642  | 9  | 11,440,946 | 11,441,391 |
| E1 | FCA993       | --     | --   | binmed [BRCA1 - GHJ] | 17 | 40,697,786  | 40,723,894  | 9  | 10,876,761 | 10,877,263 |
| E1 | MYL4         | --     | --   | binmed [BRCA1 - GHJ] | 17 | 42,641,783  | 42,658,044  | 9  | 10,402,162 | 10,413,291 |
| E1 | 38966150     | --     | --   | binmed [BRCA1 - GHJ] | 17 | 31,264,453  | 31,264,729  | 9  | 10,711,784 | 10,714,348 |
| E1 | FCA991       | 1061.0 | 1.0  | placed               | 17 | 38,179,020  | 38,202,125  | 9  | 12,885,392 | 12,885,731 |
| E1 | Fc.182584    | 1072.1 | 2.4  | placed               | 17 | 39,638,134  | 39,638,349  | 9  | 11,842,051 | 11,842,464 |
| E1 | HIS1         | 1074.7 | 6.1  | frame                | 17 | 40,583,318  | 40,584,051  | 9  | 11,033,986 | 11,034,340 |
| E1 | GHI          | 1088.1 | 4.2  | frame                | 17 | 59,349,433  | 59,349,533  | 9  | 7,815,566  | 7,815,684  |
| E1 | SCN4A        | 1096.0 | 1.5  | placed               | 17 | 59,373,907  | 59,374,044  | 9  | 7,795,881  | 7,796,179  |
| E1 | Fc.19235     | 1101.4 | 4.2  | frame                | 17 | 59,470,286  | 59,470,521  | 9  | 7,718,308  | 7,718,784  |
| E1 | FCA312       | 1115.9 | 1.4  | frame                | 17 | 62,330,196  | 62,332,367  | 9  | 6,085,718  | 6,086,855  |
| E1 | LG30_D09     | 1124.2 | 1.4  | frame                | 17 | 61,151,610  | 61,153,068  | 9  | 5,211,764  | 5,212,280  |
| E1 | DDX5         | 1132.4 | 1.4  | frame                | 17 | 59,925,213  | 59,925,723  | 9  | 7,346,239  | 7,346,760  |
| E1 | 39014260     | 1143.9 | 3.5  | frame                | 17 | 65,521,760  | 65,521,974  | 9  | 3,328,805  | 3,329,218  |
| E1 | 38988761     | 1187.3 | 3.2  | frame                | 9  | 100,145,464 | 100,145,713 | 11 | 58,560,459 | 58,560,956 |
| E1 | SSTR2        | 1217.9 | 3.2  | frame                | 17 | 68,672,755  | 68,679,655  | 18 | 23,750,690 | 23,757,458 |
| E1 | H3F3B        | 1239.5 | 6.0  | frame                | 17 | 71,285,137  | 71,287,475  | 18 | 25,952,302 | 25,953,518 |
| E1 | TK1          | 1283.6 | 3.6  | frame                | 17 | 73,681,857  | 73,682,128  | 18 | 27,789,121 | 27,800,193 |
| E1 | TIMP2        | 1301.1 | 3.6  | frame                | 17 | 74,399,256  | 74,410,878  | 18 | 28,216,781 | 28,228,782 |
| E1 | ACTG1        | 1337.0 | 6.2  | frame                | 17 | 77,095,976  | 77,096,123  | 18 | 30,151,842 | 30,153,525 |
| E1 | PDE6G        | 1363.2 | 3.4  | frame                | 17 | 77,230,588  | 77,230,742  | 18 | 30,261,568 | 30,263,070 |
| E1 | P4HB         | 1376.5 | 3.8  | placed               | 17 | 77,397,591  | 77,397,630  | 18 | 30,356,560 | 30,356,611 |
| E1 | FCA113       | 1379.8 | 2.1  | frame                | 17 | 76,925,761  | 76,954,389  | 18 | 30,002,452 | 30,029,354 |
| E1 | FCA994       | 1389.9 | 2.1  | frame                | 17 | 76,166,068  | 76,166,378  | 18 | 29,455,373 | 29,455,423 |

|    |            |       |      |         |    |            |            |    |             |             |
|----|------------|-------|------|---------|----|------------|------------|----|-------------|-------------|
| E2 | LG9-16_F10 | 0.0   | 3.8  | frame   | 19 | 60,917,128 | 60,917,600 | 1  | 104,707,346 | 104,707,696 |
| E2 | PRKCG      | 15.3  | 0.2  | placed  | 19 | 59,077,366 | 59,102,178 | 1  | 105,988,751 | 106,006,003 |
| E2 | TNN13      | 20.0  | 4.7  | frame   | 19 | 60,357,209 | 60,357,388 | 1  | 105,167,291 | 105,168,975 |
| E2 | FCA070     | 27.1  | 4.7  | frame   | 19 | 58,659,278 | 58,715,897 | 1  | 106,384,687 | 106,385,094 |
| E2 | FCA589     | 39.5  | 4.2  | frame   |    |            |            |    |             |             |
| E2 | 39086418   | 57.6  | 2.9  | frame   | 19 | 63,147,085 | 63,147,271 | 1  | 102,663,601 | 102,663,785 |
| E2 | FCA997     | --    | --   | binnead | 19 | 54,560,910 | 54,569,816 | 1  | 109,375,794 | 109,377,938 |
| E2 | ZNF134     | 62.3  | 3.4  | placed  | 19 | 62,824,834 | 62,824,754 | 1  | 103,060,843 | 103,061,267 |
| E2 | LHB        | 107.7 | 0.2  | placed  | 19 | 54,211,137 | 54,211,337 | 1  | 109,648,920 | 109,649,650 |
| E2 | NUP62      | 112.3 | 4.7  | frame   | 19 | 55,101,912 | 55,102,000 | 1  | 108,925,790 | 108,926,274 |
| E2 | C3         | 114.5 | 2.0  | placed  | 13 | 41,161,518 | 41,165,062 | 22 | 11,975,757  | 11,982,617  |
| E2 | LOC163223  | 116.7 | 0.5  | placed  | 19 | 53,481,652 | 53,481,742 | 1  | 110,214,165 | 110,214,494 |
| E2 | FCA998     | 123.8 | 1.5  | placed  |    |            |            |    |             |             |
| E2 | FCA996     | 133.2 | 4.7  | frame   | 19 | 51,130,090 | 51,156,252 | 1  | 111,891,543 | 111,891,946 |
| E2 | BAX        | --    | --   | binnead | 19 | 54,149,997 | 54,156,705 | 1  | 109,690,626 | 109,692,130 |
| E2 | 39079853   | 142.6 | 4.7  | frame   | 19 | 49,624,875 | 49,625,237 | 1  | 113,121,397 | 113,121,889 |
| E2 | TGFB1      | 156.7 | 6.8  | frame   | 19 | 46,528,798 | 46,550,789 | 1  | 114,817,034 | 114,831,760 |
| E2 | FCA308     | 161.2 | 2.8  | placed  | 19 | 44,986,422 | 44,986,501 | 1  | 115,861,731 | 115,861,977 |
| E2 | FCA1000    | 161.2 | 6.8  | frame   | 19 | 45,165,022 | 45,165,109 | 1  | 115,757,992 | 115,758,190 |
| E2 | FCA999     | 168.1 | 2.4  | placed  | 19 | 42,032,532 | 42,034,636 | 1  | 117,882,381 | 117,882,805 |
| E2 | PSMD8      | 170.2 | 5.6  | frame   | 19 | 43,557,160 | 43,557,294 | 1  | 116,814,104 | 116,814,380 |
| E2 | FLJ22059   | 192.0 | 1.4  | placed  | 19 | 47,277,172 | 47,277,282 | 1  | 114,440,679 | 114,441,030 |
| E2 | LOC56269   | 198.7 | 5.6  | frame   | 19 | 48,915,595 | 48,915,920 | 1  | 113,677,886 | 113,678,302 |
| E2 | PAPA4H1B3  | --    | --   | binnead | 19 | 47,493,063 | 47,493,358 | 1  | 114,253,655 | 114,254,846 |
| E2 | ETV2       | 223.9 | 4.0  | placed  | 19 | 39,098,248 | 39,116,118 | 1  | 119,158,038 | 119,158,133 |
| E2 | FELDI      | 230.9 | 0.4  | placed  | 19 | 39,890,464 | 39,890,587 | 1  | 119,978,883 | 119,981,398 |
| E2 | FCA1001    | 233.1 | 0.5  | placed  | 19 | 39,377,218 | 39,410,365 | 1  | 120,434,250 | 120,434,560 |
| E2 | ATP4A      | 237.6 | 6.6  | frame   | 19 | 40,726,406 | 40,726,571 | 1  | 119,307,128 | 119,308,838 |
| E2 | FCA531     | 254.2 | 0.6  | frame   | 19 | 37,126,167 | 37,126,253 | 1  | 122,101,522 | 122,101,896 |
| E2 | FCA1002    | --    | --   | binnead | 19 | 37,307,616 | 37,307,783 | 1  | 121,933,292 | 121,933,549 |
| E2 | LG33_H07   | 261.3 | 4.1  | placed  | 19 | 36,387,229 | 36,387,304 | 1  | 122,711,564 | 122,711,854 |
| E2 | UQCRRF51   | 279.4 | 10.6 | frame   | 19 | 34,390,079 | 34,395,884 | 1  | 124,256,181 | 124,256,644 |
| E2 | PHKB       | 321.5 | 13.0 | frame   | 16 | 46,291,239 | 46,291,389 | 2  | 67,913,961  | 67,914,412  |
| E2 | 38988645   | 344.3 | 6.8  | placed  | 16 | 49,968,371 | 49,968,621 | 2  | 64,686,676  | 64,686,937  |
| E2 | FCA665     | 358.8 | 13.0 | frame   | 16 | 50,974,112 | 50,974,402 | 2  | 63,783,996  | 63,784,316  |
| E2 | FCA1003    | 380.9 | 5.8  | frame   | 16 | 53,099,959 | 53,100,114 | 2  | 32,937,778  | 32,937,852  |
| E2 | CES1       | 390.1 | 4.7  | frame   | 16 | 55,199,996 | 55,200,909 | 2  | 60,914,172  | 60,943,266  |
| E2 | FCA1004    | 394.7 | 1.3  | placed  | 16 | 54,555,973 | 54,558,068 | 2  | 60,793,991  | 60,794,270  |
| E2 | LG_19_59   | 399.3 | 2.7  | placed  | 16 | 54,466,935 | 54,467,647 | 2  | 60,871,027  | 60,872,205  |
| E2 | LG35_B06   | 406.1 | 2.2  | frame   | 16 | 55,059,477 | 55,060,195 | 2  | 60,358,417  | 60,359,084  |
| E2 | CCL17      | 415.5 | 2.2  | frame   | 16 | 56,005,293 | 56,007,475 | 2  | 59,634,050  | 59,635,694  |
| E2 | Fc.4288    | 429.8 | 7.2  | frame   | 16 | 56,157,072 | 56,157,144 | 2  | 59,516,057  | 59,516,538  |
| E2 | 39015843   | 450.2 | 1.0  | frame   | 16 | 58,061,498 | 58,061,693 | 5  | 91,557,432  | 91,557,031  |
| E2 | FCA996     | 467.7 | 1.0  | frame   | 16 | 60,536,880 | 60,537,297 | 5  | 89,613,931  | 89,614,339  |
| E2 | 39015424   | 499.5 | 2.0  | frame   | 16 | 61,177,076 | 61,177,193 | 5  | 89,113,646  | 89,113,523  |
| E2 | FCA1005    | 522.7 | 1.7  | frame   | 16 | 62,885,374 | 62,885,916 | 5  | 87,731,922  | 87,732,670  |
| E2 | FCA1006    | 532.4 | 1.7  | frame   | 16 | 63,797,204 | 63,797,553 | 5  | 86,980,845  | 86,981,329  |
| E2 | FCA1009    | --    | --   | binnead | 16 | 65,841,374 | 65,841,566 | 5  | 85,215,336  | 85,215,561  |
| E2 | FCA1010    | --    | --   | binnead | 16 | 65,109,188 | 65,109,283 | 5  | 85,842,290  | 85,842,613  |
| E2 | FCA1007    | --    | --   | binnead | 16 | 63,967,376 | 63,969,434 | 5  | 86,623,289  | 86,623,514  |
| E2 | FCA075     | 537.3 | 2.8  | placed  | 16 | 64,139,170 | 64,139,293 | 5  | 86,689,903  | 86,690,123  |
| E2 | TRADD      | 542.1 | 2.7  | frame   | 16 | 65,745,605 | 65,751,290 | 5  | 85,299,457  | 85,299,823  |
| E2 | 39087346   | 544.5 | 1.9  | placed  | 16 | 67,930,577 | 67,930,631 | 5  | 83,405,712  | 83,405,645  |
| E2 | TERF2      | 544.5 | 1.9  | placed  | 16 | 67,947,035 | 67,977,360 | 5  | 83,367,116  | 83,394,089  |
| E2 | LG31-E11   | 549.3 | 2.7  | frame   | 16 | 70,693,257 | 70,703,082 | 5  | 80,905,497  | 80,916,738  |
| E2 | FCA085     | 558.9 | 3.9  | frame   | 16 | 71,313,052 | 71,315,151 | 5  | 81,460,405  | 81,460,587  |
| E2 | FCA032     | 570.8 | 4.6  | frame   | 16 | 67,547,596 | 67,547,966 | 5  | 83,737,714  | 83,740,230  |
| E2 | FCA1011    | 580.3 | 0.9  | placed  | 16 | 75,408,957 | 75,408,999 | 5  | 77,401,322  | 77,401,439  |
| E2 | 39082012   | 587.4 | 1.4  | frame   | 16 | 75,256,028 | 75,256,172 | 5  | 77,507,595  | 77,507,942  |
| E2 | LG9-13_B09 | --    | --   | binnead | 16 | 78,746,383 | 78,746,793 | 5  | 74,580,225  | 74,580,579  |
| E2 | LG31_C08   | --    | --   | binnead | 16 | 77,892,822 | 77,893,189 | 5  | 75,310,120  | 75,310,596  |
| E2 | 39063564   | 594.5 | 1.4  | frame   | 16 | 77,801,220 | 77,801,329 | 5  | 75,381,640  | 75,382,043  |
| E2 | FCA1012    | 601.5 | 3.9  | frame   | 16 | 78,246,511 | 78,246,846 | 5  | 74,994,546  | 74,994,759  |
| E2 | FCA586     | --    | --   | binnead | 16 | 81,773,398 | 81,774,782 | 5  | 72,069,811  | 72,077,574  |
| E2 | 39078497   | 627.9 | 1.5  | placed  | 16 | 81,241,478 | 81,241,633 | 5  | 72,541,240  | 72,541,578  |
| E2 | FCA1013    | 654.6 | 3.1  | frame   | 16 | 83,693,328 | 83,726,154 | 5  | 70,511,582  | 70,511,804  |
| E2 | MC1R       | 680.3 | 3.1  | frame   | 16 | 88,513,174 | 88,514,106 | 5  | 66,758,726  | 66,759,652  |



E3 39017295 0.0 1.0 frame  
 E3 FLJ12566 11.4 1.0 frame  
 E3 LG22\_A10 30.9 1.7 frame  
 E3 FCA466 56.1 3.2 frame  
 E3 MCM7 70.2 3.2 frame  
 E3 GNB2 81.6 4.4 frame  
 E3 EPO 83.8 0.1 placed  
 E3 ACHE 90.4 4.4 frame  
 E3 CUTL1 106.7 4.6 frame  
 E3 PMS2L11 118.1 1.7 frame  
 E3 FCA628 122.5 0.3 placed  
 E3 MDH2 124.7 0.5 placed  
 E3 ZP3 129.2 1.7 frame  
 E3 NPD007 140.6 4.3 frame  
 E3 BCL7B - - [NPD007 - ELN]  
 E3 BAZ1B 152.2 3.2 placed  
 E3 ELN 163.7 6.4 frame  
 E3 FCA1014 165.9 0.3 placed  
 E3 FCA004 193.7 0.3 placed  
 E3 GTF2IRD1 215.7 6.7 frame  
 E3 LG34\_F05 240.1 4.7 frame  
 E3 39079135 249.4 4.7 frame  
 E3 GUSB 284.6 2.5 frame  
 E3 39017238 296.9 2.5 frame  
 E3 39039307 325.5 0.6 placed  
 E3 SRCAP 332.3 9.0 frame  
 E3 MVP 336.8 0.9 placed  
 E3 FCA031 393.0 11.0 frame  
 E3 Fc\_28607 423.7 5.0 frame  
 E3 ZP2 433.3 5.0 frame  
 E3 LG27\_F06 456.6 4.8 frame  
 E3 39012428 471.7 2.6 frame  
 E3 434 490.4 1.5 frame  
 E3 LG25\_F11 532.4 1.9 frame  
 E3 39029429 540.0 1.9 frame  
 E3 FRM1 552.8 3.3 frame  
 E3 FCA1015 565.5 3.3 frame  
 E3 PMS 587.2 4.8 frame  
 E3 39087293 619.9 2.1 placed  
 E3 FCA476 636.5 1.9 frame  
 E3 39085248 649.6 1.9 frame  
 E3 39088945 666.4 2.2 frame  
 E3 NY-CO-7 674.3 1.4 frame  
 E3 PKD1 684.6 1.2 frame  
 E3 ZNF263 697.2 1.2 frame

|    |             |             |    |            |            |
|----|-------------|-------------|----|------------|------------|
| 7  | 2,760,438   | 2,760,748   | 6  | 17,048,998 | 17,049,718 |
| 7  | 4,584,108   | 4,584,246   | 6  | 15,614,403 | 15,614,866 |
| 7  | 6,554,456   | 6,556,537   | 6  | 14,151,686 | 14,153,767 |
| 7  | 99,335,212  | 99,335,409  | 6  | 12,222,284 | 12,222,749 |
| 7  | 99,915,812  | 99,921,442  | 6  | 11,754,795 | 11,759,950 |
| 7  | 99,964,938  | 99,965,117  | 6  | 11,716,842 | 11,718,158 |
| 7  | 100,135,424 | 100,136,395 | 6  | 11,595,251 | 11,599,284 |
| 7  | 101,052,675 | 101,520,684 | 6  | 10,580,343 | 10,836,992 |
| 7  | 75,777,404  | 75,777,556  | 6  | 10,369,108 | 10,370,288 |
| 7  | 75,617,438  | 75,617,786  | 6  | 10,249,927 | 10,250,515 |
| 7  | 75,322,020  | 75,341,455  | 6  | 10,118,936 | 10,134,889 |
| 7  | 75,707,460  | 75,707,612  | 6  | 10,315,869 | 10,324,405 |
| 7  | 75,156,038  | 75,156,185  | 6  | 9,951,433  | 9,951,910  |
| 7  | 72,336,075  | 72,337,725  | 6  | 9,410,345  | 9,431,215  |
| 7  | 72,299,399  | 72,381,266  | 6  | 9,439,042  | 9,507,793  |
| 7  | 72,887,098  | 72,928,658  | 6  | 9,029,760  | 9,060,358  |
| 7  | 72,713,154  | 72,713,204  | 6  | 8,907,831  | 8,908,114  |
| 13 | 76,223,030  | 76,229,028  | 22 | 32,366,574 | 32,379,911 |
| 7  | 73,461,331  | 73,461,561  | 6  | 8,619,973  | 8,695,582  |
| 16 | 28,446,148  | 28,447,138  | 6  | 19,801,006 | 19,801,464 |
| 7  | 69,589,254  | 69,589,407  | 6  | 5,580,255  | 5,579,968  |
| 7  | 64,869,825  | 64,891,346  | 6  | 3,464,984  | 3,478,038  |
| 7  | 55,853,571  | 55,853,778  | 6  | 3,227,140  | 3,227,001  |
| 16 | 31,051,247  | 31,051,606  | 6  | 18,978,976 | 18,978,205 |
| 16 | 30,622,888  | 30,663,100  | 6  | 18,626,278 | 18,652,561 |
| 16 | 29,738,388  | 29,738,576  | 6  | 19,446,037 | 19,446,444 |
| 16 | 24,647,914  | 24,742,629  | 6  | 22,985,398 | 22,985,569 |
| 16 | 20,843,122  | 20,843,208  | 6  | 26,026,026 | 26,026,417 |
| 16 | 21,120,206  | 21,120,383  | 6  | 25,813,155 | 25,825,374 |
| 16 | 20,539,889  | 20,540,205  | 6  | 26,392,104 | 26,392,686 |
| 16 | 19,752,128  | 19,752,326  | 6  | 27,050,186 | 27,049,857 |
| 16 | 9,271,254   | 9,271,829   | 6  | 34,636,521 | 34,637,043 |
| 16 | 9,221,646   | 9,221,888   | 6  | 34,675,184 | 34,675,489 |
| 16 | 11,282,207  | 11,282,249  | 6  | 33,098,863 | 33,099,136 |
| 16 | 13,237,621  | 13,237,905  | 6  | 31,173,061 | 31,173,324 |
| 16 | 18,418,858  | 18,419,006  | 6  | 29,327,124 | 29,327,522 |
| 16 | 6,382,693   | 6,383,026   | 6  | 36,943,676 | 36,944,200 |
| 16 | 5,752,115   | 5,766,744   | 6  | 37,439,956 | 37,450,223 |
| 16 | 4,752,566   | 4,752,711   | 6  | 38,267,315 | 38,267,157 |
| 16 | 2,067,861   | 2,067,989   | 6  | 40,467,041 | 40,467,169 |
| 16 | 672,593     | 672,746     | 6  | 41,518,584 | 41,518,851 |
| 16 | 2,079,486   | 2,079,735   | 6  | 40,445,889 | 40,473,395 |
| 16 | 3,273,488   | 3,281,455   | 6  | 39,551,589 | 39,558,462 |

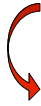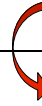

|    |            |       |     |        |                        |   |             |             |    |            |            |
|----|------------|-------|-----|--------|------------------------|---|-------------|-------------|----|------------|------------|
| F1 | FCA1016    | 0.0   | 1.5 | frame  |                        | 1 | 223,488,798 | 223,924,529 | 7  | 40,685,377 | 40,685,503 |
| F1 | LG_19.62   | 19.4  | 1.5 | frame  |                        | 1 | 222,301,779 | 222,302,565 | 7  | 41,625,558 | 41,626,253 |
| F1 | 39025242   | 65.8  | 1.8 | frame  |                        | 1 | 239,828,113 | 239,828,374 | 7  | 37,090,832 | 37,090,519 |
| F1 | 39015461   | 72.9  | 1.4 | placed |                        | 1 | 239,243,534 | 239,243,666 | 7  | 36,638,022 | 36,638,489 |
| F1 | lg9-9_f12  | 75.2  | 1.8 | frame  |                        | 1 | 239,451,370 | 239,451,768 | 7  | 36,782,940 | 36,783,305 |
| F1 | CD3Z       | 100.3 | 5.2 | frame  |                        | 1 | 164,132,487 | 164,132,602 | 7  | 33,587,622 | 33,587,770 |
| F1 | 38973657   | 128.2 | 1.6 | frame  |                        | 1 | 166,395,224 | 166,395,392 | 7  | 31,537,944 | 31,537,603 |
| F1 | LG_18.3    | 140.4 | 3.2 | placed |                        | 1 | 166,731,166 | 166,731,749 | 7  | 31,238,263 | 31,238,957 |
| F1 | FCA344     | 160.5 | 0.7 | frame  |                        | 1 | 168,186,353 | 168,294,306 | 7  | 30,683,947 | 30,684,555 |
| F1 | KIAA1096   | 177.5 | 0.7 | frame  |                        | 1 | 169,062,056 | 169,062,230 | 7  | 29,986,689 | 30,024,732 |
| F1 | Fc.97375   | 194.3 | 3.4 | frame  |                        | 1 | 168,852,122 | 168,859,948 | 7  | 29,238,822 | 29,239,079 |
| F1 | TNFSF6     | 211.5 | 3.2 | frame  |                        | 1 | 170,997,194 | 170,997,557 | 7  | 28,952,682 | 28,960,066 |
| F1 | FCA1017    | 226.2 | 3.2 | frame  |                        | 1 | 170,615,522 | 170,615,644 | 7  | 27,607,390 | 27,609,844 |
| F1 | SERPINC1   | 265.8 | 6.9 | frame  |                        | 1 | 171,341,954 | 171,342,243 | 7  | 27,940,500 | 27,940,726 |
| F1 | 38986132   | 281.1 | 1.7 | frame  |                        | 1 | 172,348,355 | 172,348,483 | 7  | 27,322,730 | 27,322,322 |
| F1 | 39010520   | 288.0 | 1.7 | frame  |                        | 1 | 172,687,714 | 172,687,885 | 7  | 26,430,854 | 26,431,071 |
| F1 | 39016130   | 288.0 | 1.7 | frame  |                        | 1 | 173,684,591 | 173,685,140 | 7  | 26,123,905 | 26,124,438 |
| F1 | 39005517   | 297.3 | 3.6 | frame  |                        | 1 | 175,777,151 | 175,777,344 | 7  | 25,252,881 | 25,252,143 |
| F1 | KIAA0475   | 307.0 | 3.5 | frame  |                        | 1 | 174,579,310 | 174,588,374 | 7  | 23,368,739 | 23,369,109 |
| F1 | FCA1016    | 327.9 | 3.5 | frame  |                        | 1 | 183,144,732 | 183,145,297 | 7  | 24,392,818 | 24,399,312 |
| F1 | PDC1       | 349.4 | 3.9 | frame  |                        | 1 | 182,770,503 | 182,770,885 | 7  | 22,113,759 | 22,117,645 |
| F1 | LG34_C04   | 362.4 | 4.9 | frame  |                        | 1 | 179,469,716 | 179,469,858 | 7  | 21,753,491 | 21,753,882 |
| F1 | 39086365   | --    | --  | binned | [LG34_C04 - Fc.112017] | 1 | 179,588,340 | 179,588,606 | 7  | 18,777,343 | 18,776,962 |
| F1 | NM_030588  | --    | --  | binned | [LG34_C04 - FCA1022]   | 1 | 181,740,330 | 181,740,452 | 7  | 18,848,582 | 18,903,484 |
| F1 | 39039811   | 372.6 | 1.2 | placed |                        | 1 | 179,724,210 | 179,846,384 | 7  | 20,841,969 | 20,841,574 |
| F1 | LAMC1      | 380.2 | 3.8 | placed |                        | 1 | 179,600,688 | 179,601,028 | 7  | 19,017,018 | 19,138,376 |
| F1 | Fc.112017  | 385.0 | 5.2 | frame  |                        | 1 | 208,225,163 | 208,391,059 | 7  | 18,911,055 | 18,912,158 |
| F1 | FCA1022    | 403.6 | 1.9 | frame  |                        | 1 | 208,225,163 | 208,391,059 | 7  | 12,682,695 | 12,683,108 |
| F1 | FCA1023    | 403.6 | 1.9 | frame  |                        | 1 | 208,285,195 | 208,285,485 | 7  | 12,682,133 | 12,682,428 |
| F1 | FCA1022    | --    | --  | binned | [FCA1022 - FCA1019]    | 1 | 211,223,773 | 211,226,122 | 7  | 15,221,298 | 15,223,519 |
| F1 | FCA1021    | 414.0 | 5.8 | frame  |                        | 1 | 210,590,828 | 210,590,926 | 7  | 14,641,848 | 14,642,204 |
| F1 | FCA1019    | 431.9 | 8.2 | frame  |                        | 1 | 210,919,660 | 211,026,649 | 7  | 14,977,642 | 14,977,957 |
| F1 | LG9-16_C06 | 452.8 | 9.0 | frame  |                        | 1 | 204,990,754 | 204,991,136 | 7  | 9,848,183  | 9,848,598  |
| F1 | LG7_D01    | 471.7 | 0.2 | placed |                        |   |             |             |    |            |            |
| F1 | FCA223     | 488.0 | 0.2 | placed |                        | 1 | 206,648,452 | 206,648,685 | 7  | 11,316,598 | 11,316,818 |
| F1 | FCA1024    | 483.1 | 5.1 | frame  |                        | 1 | 205,905,777 | 205,905,841 | 7  | 10,616,634 | 10,616,884 |
| F1 | ASPM       | --    | --  | binned | [FCA1024 - LG31_C10]   | 1 | 193,785,110 | 193,847,224 | 7  | 8,244,522  | 8,311,671  |
| F1 | FCA1025    | 501.1 | 2.2 | placed |                        | 1 | 206,863,397 | 207,236,414 | 7  | 11,744,316 | 11,744,643 |
| F1 | IRF6       | 509.3 | 0.5 | placed |                        | 1 | 206,351,514 | 206,351,630 | 7  | 11,052,486 | 11,052,911 |
| F1 | LG31_C10   | 512.0 | 5.1 | frame  |                        | 1 | 206,379,883 | 206,380,566 | 7  | 11,079,701 | 11,080,147 |
| F1 | FCA1027    | --    | --  | binned | [LG31_C10 - FCA191]    | 1 | 180,315,091 | 180,315,140 | 7  | 4,333,736  | 4,334,075  |
| F1 | FCA1026    | 517.7 | 1.9 | placed |                        | 1 | 204,460,896 | 204,460,946 | 7  | 9,345,367  | 9,345,752  |
| F1 | IL10       | 517.7 | 2.2 | placed |                        | 1 | 203,332,647 | 203,332,801 | 7  | 8,583,777  | 8,587,518  |
| F1 | 39010812   | 544.8 | 5.0 | placed |                        | 1 | 196,637,377 | 196,648,115 | 7  | 5,775,571  | 5,781,326  |
| F1 | 39062137   | 568.4 | 2.3 | placed |                        | 1 | 203,146,889 | 203,147,032 | 38 | 5,839,700  | 5,839,849  |
| F1 | 39029411   | 573.9 | 1.6 | placed |                        | 1 | 201,470,197 | 201,470,361 | 38 | 4,303,458  | 4,303,089  |
| F1 | FCA191     | 579.5 | 7.7 | frame  |                        | 1 | 200,327,699 | 200,331,702 | 38 | 3,318,764  | 3,318,914  |
| F1 | 39052089   | 585.0 | 1.2 | placed |                        | 1 | 201,669,557 | 201,669,836 | 38 | 4,491,607  | 4,491,927  |
| F1 | FCA1028    | 601.9 | 3.1 | frame  |                        |   |             |             |    |            |            |
| F1 | CYB5R1     | 615.0 | 3.1 | frame  |                        | 1 | 199,662,200 | 199,662,250 | 7  | 3,257,639  | 3,257,920  |
| F1 | TNNT2      | 636.1 | 1.1 | placed |                        | 1 | 198,059,803 | 198,078,465 | 7  | 4,544,183  | 4,549,620  |
| F1 | 39082183   | 665.3 | 1.0 | placed |                        | 1 | 98,563,315  | 98,563,848  | 6  | 52,841,108 | 52,841,632 |
| F1 | 39040612   | 694.6 | 4.2 | placed |                        | 1 | 188,319,097 | 188,319,280 | 38 | 10,221,903 | 10,222,206 |
| F1 | FCA1034    | 710.2 | 2.0 | frame  |                        | 1 | 186,798,805 | 187,155,677 | 38 | 11,686,012 | 11,686,310 |
| F1 | 38974162   | 731.1 | 1.2 | placed |                        | 1 | 216,340,381 | 216,340,495 | 38 | 17,608,592 | 17,611,040 |
| F1 | TGFB2      | 751.1 | 2.8 | frame  |                        | 1 | 214,908,172 | 214,908,320 | 38 | 16,428,775 | 16,429,043 |
| F1 | 38985407   | 765.8 | 2.8 | frame  |                        | 1 | 213,404,440 | 213,404,580 | 38 | 15,161,987 | 15,161,856 |
| F1 | FCA120     | 770.7 | 1.8 | placed |                        | 1 | 213,523,799 | 213,524,820 | 38 | 15,278,600 | 15,280,642 |
| F1 | 39038252   | 780.8 | 2.8 | frame  |                        | 1 | 212,433,671 | 212,433,858 | 38 | 14,278,660 | 14,278,344 |
| F1 | 39089859   | 799.0 | 2.0 | frame  |                        | 1 | 217,501,307 | 217,501,446 | 38 | 18,589,599 | 18,590,035 |
| F1 | 39029434   | --    | --  | binned | [39038252 - LG21_E09]  | 1 | 163,267,069 | 163,267,219 | 38 | 25,562,823 | 25,562,409 |
| F1 | LG21_E09   | 810.5 | 2.0 | frame  |                        | 1 | 155,409,427 | 155,409,656 | 38 | 19,513,668 | 19,513,860 |
| F1 | FCGR3A     | 815.7 | 2.1 | placed |                        | 1 | 158,327,557 | 158,327,673 | 38 | 21,562,178 | 21,563,220 |
| F1 | FCA1030    | 818.3 | 4.5 | placed |                        | 1 | 157,856,532 | 157,857,252 | 38 | 21,302,988 | 21,308,377 |
| F1 | FCA1033    | 829.1 | 1.7 | placed |                        | 1 | 159,848,790 | 159,869,817 | 38 | 22,926,866 | 22,927,121 |
| F1 | FCA1032    | 837.3 | 0.8 | placed |                        | 1 | 161,904,785 | 162,056,454 | 38 | 24,527,207 | 24,527,398 |
| F1 | 31_091new  | 840.0 | 1.3 | placed |                        | 1 | 161,843,498 | 161,843,527 | 38 | 24,446,576 | 24,446,902 |
| F1 | CCT3       | 856.8 | 3.7 | frame  |                        | 1 | 153,091,837 | 153,092,169 | 7  | 44,189,740 | 44,190,079 |
| F1 | PKLR       | 859.4 | 1.5 | placed |                        | 1 | 152,077,142 | 152,077,262 | 7  | 44,880,010 | 44,880,199 |
| F1 | GBA        | 864.8 | 3.7 | frame  |                        | 1 | 152,022,748 | 152,022,891 | 7  | 44,929,782 | 44,929,928 |
| F1 | RPS27      | 873.1 | 3.8 | frame  |                        | 1 | 150,776,311 | 150,777,696 | 7  | 45,782,827 | 45,784,006 |
| F1 | FCA1031    | --    | --  | binned | [RPS27 - FCA1029]      | 1 | 161,596,376 | 161,596,418 | 38 | 24,262,150 | 24,262,509 |
| F1 | LG31_A08   | 890.6 | 2.1 | frame  |                        | 1 | 159,604,078 | 159,604,392 | 38 | 22,712,529 | 22,712,856 |
| F1 | 39079428   | 896.1 | 0.8 | placed |                        | 1 | 87,788,783  | 87,788,862  | 6  | 62,237,867 | 62,237,963 |
| F1 | FCA1029    | 904.4 | 2.1 | frame  |                        | 1 | 161,826,854 | 161,843,458 | 38 | 24,427,422 | 24,448,306 |
| F1 | LG21_G10   | 921.8 | 5.1 | frame  |                        | 1 | 161,515,246 | 161,516,070 | 38 | 24,170,568 | 24,171,094 |

|    |            |       |      |         |   |             |             |    |            |            |
|----|------------|-------|------|---------|---|-------------|-------------|----|------------|------------|
| F2 | FCA136     | 0.0   | 8.9  | placed  | 8 | 55,270,525  | 55,271,167  | 29 | 8,761,100  | 8,762,469  |
| F2 | KIAA0203   | 63.3  | 9.0  | frame   | 8 | 53,697,652  | 53,697,892  | 29 | 7,459,129  | 7,459,366  |
| F2 | MOS        | 93.1  | 4.7  | frame   | 8 | 57,188,055  | 57,189,095  | 29 | 10,523,113 | 10,524,163 |
| F2 | LG23_B11   | 97.5  | 1.6  | placed  | 8 | 57,389,829  | 57,389,890  | 29 | 10,682,432 | 10,682,927 |
| F2 | PENK       | 108.8 | 4.7  | frame   | 8 | 57,516,437  | 57,516,656  | 29 | 10,789,802 | 10,770,360 |
| F2 | LG_20.79   | 120.4 | 6.0  | frame   | 8 | 59,293,704  | 59,294,137  | 29 | 12,078,597 | 12,079,020 |
| F2 | FCA1036    | 140.4 | 5.0  | frame   | 8 | 59,883,227  | 60,194,074  | 29 | 12,579,954 | 12,580,217 |
| F2 | LG_19.47   | 155.0 | 5.0  | frame   | 8 | 61,467,215  | 61,468,036  | 29 | 13,870,763 | 13,871,408 |
| F2 | FCA502     | --    | --   | blinded | 8 | 65,448,787  | 65,645,150  | 29 | 17,373,133 | 17,375,256 |
| F2 | FCA220     | 172.6 | 5.6  | placed  | 8 | 65,668,143  | 65,670,193  | 29 | 17,448,831 | 17,448,956 |
| F2 | LG_18.74   | 177.4 | 5.1  | placed  | 8 | 66,852,158  | 66,853,142  | 29 | 18,457,413 | 18,459,468 |
| F2 | LG9_9_G07  | 199.9 | 3.5  | placed  | 8 | 69,263,772  | 69,263,838  | 29 | 20,701,351 | 20,701,889 |
| F2 | 39160890   | 206.9 | 1.0  | placed  | 8 | 68,595,217  | 68,595,313  | 29 | 20,012,933 | 20,012,579 |
| F2 | CRH        | 218.8 | 10.3 | frame   | 8 | 67,251,173  | 67,253,378  | 29 | 18,837,182 | 18,839,111 |
| F2 | lg2_h08m   | 240.9 | 2.4  | frame   | 8 | 74,551,481  | 74,553,399  | 29 | 25,048,055 | 25,050,176 |
| F2 | FCA294     | 247.8 | 2.3  | placed  | 8 | 73,873,943  | 73,876,093  | 29 | 24,483,584 | 24,484,005 |
| F2 | FCA672     | 252.4 | 2.4  | frame   | 8 | 73,756,993  | 73,759,193  | 29 | 24,369,152 | 24,369,415 |
| F2 | FCA1038    | 264.1 | 4.6  | frame   | 8 | 80,685,891  | 80,739,818  | 29 | 29,697,893 | 29,697,961 |
| F2 | FCA602     | 275.6 | 4.4  | frame   | 8 | 80,993,667  | 81,105,041  | 29 | 30,339,968 | 30,341,754 |
| F2 | FCA1037    | 282.4 | 4.4  | frame   | 8 | 81,430,651  | 81,430,823  | 29 | 30,686,832 | 30,687,185 |
| F2 | LG9-10_F02 | 301.7 | 8.9  | frame   | 8 | 85,241,300  | 85,241,659  | 29 | 33,794,926 | 33,795,301 |
| F2 | 39038530   | 308.6 | 0.2  | placed  | 8 | 85,875,326  | 85,875,590  | 29 | 34,398,659 | 34,398,944 |
| F2 | FCA350     | 341.0 | 0.6  | placed  | 8 | 89,122,805  | 89,278,652  | 29 | 36,518,611 | 36,519,809 |
| F2 | FCA170     | 383.3 | 4.7  | frame   | 8 | 95,807,743  | 95,961,638  | 29 | 42,525,102 | 42,526,403 |
| F2 | FCA1039    | 399.9 | 4.7  | frame   | 8 | 97,096,443  | 97,098,493  | 29 | 43,588,592 | 43,570,140 |
| F2 | FCA1041    | --    | --   | blinded | 8 | 103,738,791 | 103,767,361 | 13 | 7,247,523  | 7,247,702  |
| F2 | FCA1042    | 427.7 | 3.6  | frame   | 8 | 104,778,488 | 105,333,268 | 13 | 7,997,092  | 7,997,205  |
| F2 | FCA1040    | 437.1 | 0.6  | placed  | 8 | 106,400,346 | 106,884,942 | 13 | 9,538,202  | 9,538,382  |
| F2 | 38911732   | 459.9 | 3.5  | frame   | 8 | 100,790,524 | 100,790,963 | 13 | 4,681,273  | 4,681,678  |
| F2 | 39011581   | 480.3 | 3.5  | frame   | 8 | 102,518,442 | 102,518,882 | 13 | 6,153,195  | 6,153,640  |
| F2 | LG_20.65   | 512.3 | 4.8  | frame   | 8 | 107,712,416 | 107,713,099 | 13 | 10,481,606 | 10,482,131 |
| F2 | LG8_D01    | 526.9 | 4.8  | frame   | 8 | 107,580,085 | 107,580,752 | 13 | 10,349,459 | 10,349,828 |
| F2 | FCA506     | 536.4 | 6.2  | frame   | 8 | 107,913,893 | 107,915,993 | 13 | 10,660,547 | 10,662,603 |
| F2 | DC6        | 551.3 | 0.2  | frame   | 8 | 110,415,746 | 110,427,355 | 13 | 12,950,017 | 13,255,126 |
| F2 | FCA094     | 581.1 | 2.7  | frame   | 8 | 118,881,132 | 119,703,433 | 13 | 20,420,692 | 20,423,228 |
| F2 | LG2_E09    | 588.4 | 2.7  | frame   | 8 | 118,680,629 | 118,681,324 | 13 | 20,044,427 | 20,044,886 |
| F2 | FCA1043    | 590.8 | 2.8  | placed  | 8 | 122,376,393 | 122,378,493 | 13 | 23,121,059 | 23,121,258 |
| F2 | FCA1044    | 593.2 | 2.7  | placed  | 8 | 122,032,702 | 122,328,145 | 13 | 23,039,172 | 23,039,538 |
| F2 | FCA1046    | 603.0 | 2.6  | frame   | 8 | 124,728,144 | 124,728,407 | 13 | 24,996,392 | 24,996,522 |
| F2 | FCA1045    | 612.7 | 0.4  | placed  | 8 | 125,204,047 | 125,204,153 | 13 | 25,343,949 | 25,344,290 |
| F2 | FCA748     | 635.2 | 2.6  | frame   | 8 | 119,246,116 | 119,247,203 | 13 | 20,541,563 | 20,541,852 |
| F2 | 39160939   | 644.9 | 0.3  | placed  | 8 | 116,623,150 | 116,623,447 | 13 | 18,192,408 | 18,192,998 |
| F2 | MYC        | 657.4 | 4.9  | frame   | 8 | 128,821,803 | 128,822,387 | 13 | 28,257,045 | 28,259,334 |
| F2 | FCA1048    | --    | --   | blinded | 8 | 141,044,593 | 141,065,265 | 13 | 37,872,697 | 37,882,501 |
| F2 | FCA111     | 662.0 | 2.0  | placed  | 8 | 129,234,834 | 129,234,963 | 13 | 28,863,932 | 28,864,025 |
| F2 | LG4_D10    | 677.7 | 2.5  | placed  | 8 | 133,155,875 | 133,156,628 | 13 | 31,783,621 | 31,784,139 |
| F2 | 39010484   | 680.2 | 2.2  | frame   | 8 | 132,372,388 | 132,372,570 | 13 | 31,193,074 | 31,193,568 |
| F2 | TG         | 680.2 | 2.2  | frame   | 8 | 133,948,427 | 134,216,340 | 13 | 32,408,609 | 32,408,919 |
| F2 | FCA749     | 680.2 | 2.2  | frame   | 8 | 133,978,893 | 133,979,656 | 13 | 32,435,368 | 32,437,756 |
| F2 | FCA1047    | 682.5 | 0.6  | placed  | 8 | 134,955,419 | 134,937,462 | 13 | 33,224,708 | 33,225,055 |
| F2 | LG1_F03    | 689.6 | 1.8  | placed  | 8 | 138,278,416 | 138,278,535 | 13 | 35,827,190 | 35,827,356 |
| F2 | FCA750     | 696.7 | 2.2  | frame   | 8 | 139,395,368 | 139,395,613 | 13 | 36,606,589 | 36,607,181 |
| F2 | LG25_B06   | 706.0 | 3.5  | frame   | 8 | 138,341,913 | 138,343,620 | 13 | 35,878,152 | 35,880,218 |
| F2 | LG25_F03   | 717.8 | 3.5  | frame   | 8 | 131,239,997 | 131,239,393 | 13 | 30,247,603 | 30,248,043 |

|   |            |        |     |        |                    |
|---|------------|--------|-----|--------|--------------------|
| X | LG23_F02   | 0.0    | 0.8 | placed |                    |
| X | 39062284   | 12.0   | 5.9 | frame  |                    |
| X | TBL1X      | 45.3   | 1.7 | placed |                    |
| X | NLGN4X     | 47.5   | 5.9 | frame  |                    |
| X | APXL       | 72.1   | 5.9 | frame  |                    |
| X | FCA478     | 0.0    | 1.5 | frame  |                    |
| X | 39065680   | --     | --  | binmed | [FCA478 - MID1]    |
| X | 39085264   | 12.7   | 1.5 | frame  |                    |
| X | KIAA1280   | 15.9   | 1.2 | placed |                    |
| X | LG9-15_A03 | 19.2   | 1.3 | placed |                    |
| X | 826277900  | 22.3   | 1.5 | placed |                    |
| X | AMELX      | 25.5   | 0.5 | placed |                    |
| X | FCA240     | 25.5   | 0.5 | placed |                    |
| X | MID1       | 32.0   | 1.7 | frame  |                    |
| X | PIGA       | 51.8   | 8.1 | frame  |                    |
| X | RPS8KA3    | 67.1   | 0.1 | placed |                    |
| X | PDHA1      | 69.9   | 4.6 | frame  |                    |
| X | PHKA2      | 78.6   | 4.6 | frame  |                    |
| X | CNK2       | 93.2   | 4.6 | frame  |                    |
| X | ZFX        | 104.5  | 4.6 | frame  |                    |
| X | EIF2S3     | 116.1  | 6.8 | frame  |                    |
| X | LG34_E08   | 128.2  | 4.9 | frame  |                    |
| X | FCA1050    | 140.6  | 3.8 | frame  |                    |
| X | MAGEB2     | --     | --  | binmed | [EIF2S3 - MAGEB3]  |
| X | MAGEB3     | 149.9  | 3.8 | frame  |                    |
| X | DMD        | 176.7  | 4.8 | frame  |                    |
| X | LG9-13_H02 | 195.1  | 2.5 | frame  |                    |
| X | SRPX       | 210.1  | 2.5 | frame  |                    |
| X | DZKX       | --     | --  | binmed | [SRPX - LG31_H02]  |
| X | OTC        | 219.0  | 2.5 | frame  |                    |
| X | USP9X      | 224.7  | 1.1 | placed |                    |
| X | 39047717   | 232.9  | 1.0 | placed |                    |
| X | LG31_H02   | 250.1  | 2.5 | frame  |                    |
| X | MAOA       | --     | --  | binmed | [LG31_H02 - PCTK1] |
| X | LG33_D09   | 264.5  | 3.3 | frame  |                    |
| X | PCTK1      | 282.6  | 3.5 | frame  |                    |
| X | UBE1X      | 291.3  | 2.7 | frame  |                    |
| X | UTX        | 302.8  | 2.7 | frame  |                    |
| X | ARAF1      | 323.2  | 3.9 | frame  |                    |
| X | BMP15      | 359.5  | 0.7 | frame  |                    |
| X | NUDT11     | --     | --  | binmed | [ARAF1 - MAGEH1]   |
| X | SMCX       | 394.6  | 1.3 | placed |                    |
| X | MAGEH1     | 407.3  | 0.7 | frame  |                    |
| X | ALA52      | 412.2  | 0.2 | placed |                    |
| X | FCA651     | 450.5  | 2.4 | placed |                    |
| X | ASB12      | 487.0  | 9.6 | frame  |                    |
| X | MSN        | 525.7  | 9.3 | frame  |                    |
| X | PUA1       | 568.1  | 9.3 | frame  |                    |
| X | IL2RG      | 606.6  | 4.7 | frame  |                    |
| X | TAF1       | 619.6  | 4.4 | frame  |                    |
| X | LG_19.84   | 632.9  | 4.4 | frame  |                    |
| X | RPS4X      | 649.2  | 6.4 | frame  |                    |
| X | XIST       | 660.2  | 4.5 | frame  |                    |
| X | ATP7A      | 671.5  | 4.5 | frame  |                    |
| X | POU3F4     | 683.4  | 0.5 | placed |                    |
| X | FCA018     | 689.1  | 5.5 | frame  |                    |
| X | CHM        | 720.0  | 5.2 | frame  |                    |
| X | PABPC5     | 726.7  | 3.6 | placed |                    |
| X | DIAPH2     | 747.6  | 5.2 | frame  |                    |
| X | KIAA0443   | --     | --  | binmed | [DIAPH2 - PLP]     |
| X | BTX        | 768.5  | 4.1 | frame  |                    |
| X | PLP        | 778.5  | 4.1 | frame  |                    |
| X | CLDN2      | 791.6  | 2.3 | frame  |                    |
| X | AMOT       | 803.9  | 2.3 | frame  |                    |
| X | SLOC6A14   | --     | --  | binmed | [AMOT - CUL4BX]    |
| X | HTR2C      | 815.8  | 2.4 | placed |                    |
| X | AGTR2      | 824.6  | 2.4 | frame  |                    |
| X | PGHM1      | 836.7  | 2.1 | placed |                    |
| X | CUL4BX     | 845.6  | 4.9 | frame  |                    |
| X | FCA674     | 858.0  | 2.4 | frame  |                    |
| X | AUTL2      | 864.3  | 0.2 | placed |                    |
| X | FCA145     | 867.4  | 2.4 | frame  |                    |
| X | LG33_G04_M | 880.5  | 4.4 | frame  |                    |
| X | 39005496   | --     | --  | binmed | [FCA145 - F9]      |
| X | TNFSF5     | 886.6  | 2.3 | placed |                    |
| X | FCA1051    | 905.4  | 1.2 | placed |                    |
| X | F9         | 928.5  | 4.4 | frame  |                    |
| X | IDS        | --     | --  | binmed | [F9 - MPP1]        |
| X | LDOC1      | 931.8  | 0.3 | placed |                    |
| X | SLITRK4    | 935.0  | 0.3 | placed |                    |
| X | AFF2       | 978.5  | 6.2 | frame  |                    |
| X | BGN        | --     | --  | binmed | [AFF2 - TKTL1]     |
| X | FCA311     | --     | --  | binmed | [AFF2 - TKTL1]     |
| X | MPP1       | 992.7  | 3.5 | frame  |                    |
| X | OPN1LW     | 996.1  | 3.8 | placed |                    |
| X | SPRY3      | 1002.7 | 2.4 | placed |                    |
| X | TKTL1      | 1009.0 | 3.5 | frame  |                    |

|   |             |             |   |             |             |
|---|-------------|-------------|---|-------------|-------------|
| X | 4,365,856   | 4,365,968   | X | 2,379,416   | 2,379,565   |
| X | 9,242,774   | 9,497,513   | X | 6,226,629   | 6,327,951   |
| X | 5,667,820   | 6,006,442   | X | 3,380,218   | 3,597,752   |
| X | 9,564,231   | 9,727,217   | X | 6,393,695   | 6,538,222   |
| X | 11,470,972  | 11,471,199  | X | 8,122,252   | 8,122,348   |
| X | 13,792,036  | 13,792,133  | X | 10,336,869  | 10,336,413  |
| X | 9,816,823   | 9,816,950   | X | 6,632,071   | 6,632,248   |
| X | 9,846,225   | 9,919,384   | X | 6,611,716   | 6,731,637   |
| X | 10,624,110  | 10,624,520  | X | 7,346,519   | 7,348,829   |
| X | 9,756,863   | 9,758,867   | X | 6,569,556   | 6,570,201   |
| X | 11,074,581  | 11,074,771  | X | 7,723,111   | 7,723,474   |
| X | 12,900,750  | 12,909,896  | X | 9,518,511   | 9,530,355   |
| X | 10,224,110  | 10,345,213  | X | 6,984,810   | 7,139,436   |
| X | 15,097,242  | 15,109,771  | X | 11,472,261  | 11,482,744  |
| X | 19,933,172  | 20,044,366  | X | 15,955,175  | 16,067,329  |
| X | 19,121,755  | 19,137,619  | X | 15,238,061  | 15,251,831  |
| X | 18,721,537  | 18,721,624  | X | 14,852,828  | 14,853,129  |
| X | 21,152,216  | 21,420,599  | X | 17,087,310  | 17,353,919  |
| X | 23,927,419  | 23,992,178  | X | 19,663,167  | 19,696,186  |
| X | 23,832,721  | 23,855,743  | X | 19,565,248  | 19,583,673  |
| X | 24,418,678  | 24,419,220  | X | 20,076,019  | 20,076,236  |
| X | 30,014,254  | 30,014,570  | X | 21,477,112  | 21,478,288  |
| X | 27,632,353  | 27,632,845  | X | 22,844,320  | 22,846,880  |
| X | 30,897,002  | 33,117,383  | X | 27,653,056  | 27,653,186  |
| X | 37,073,050  | 37,077,433  | X | 31,964,808  | 31,966,967  |
| X | 37,764,808  | 37,836,348  | X | 32,724,056  | 32,783,797  |
| X | 40,965,423  | 40,965,710  | X | 35,588,033  | 35,588,482  |
| X | 37,965,202  | 38,036,912  | X | 32,959,717  | 33,015,796  |
| X | 40,847,891  | 40,848,138  | X | 35,475,571  | 35,485,717  |
| X | 40,815,752  | 40,815,826  | X | 35,452,002  | 35,452,170  |
| X | 41,859,539  | 41,859,850  | X | 36,380,445  | 36,380,793  |
| X | 43,340,864  | 43,340,511  | X | 37,544,091  | 37,544,162  |
| X | 43,049,944  | 43,050,275  | X | 37,324,254  | 37,324,835  |
| X | 46,844,381  | 46,844,635  | X | 40,631,780  | 40,634,651  |
| X | 46,825,691  | 46,825,785  | X | 40,614,333  | 40,614,690  |
| X | 44,674,845  | 44,675,359  | X | 38,719,309  | 38,719,813  |
| X | 47,186,594  | 47,186,679  | X | 41,003,258  | 41,003,562  |
| X | 50,486,819  | 50,492,643  | X | 43,583,411  | 43,588,339  |
| X | 51,065,899  | 51,072,463  | X | 43,739,112  | 43,744,744  |
| X | 53,129,828  | 53,129,946  | X | 44,801,338  | 44,801,734  |
| X | 55,381,558  | 55,383,019  | X | 46,841,299  | 46,841,984  |
| X | 54,930,573  | 54,930,701  |   |             |             |
| X | 63,227,096  | 63,228,524  | X | 49,301,459  | 49,303,016  |
| X | 64,670,531  | 64,744,813  | X | 53,496,415  | 53,562,874  |
| X | 68,163,718  | 68,166,409  | X | 56,395,552  | 56,398,136  |
| X | 70,109,785  | 70,114,481  | X | 58,270,255  | 58,274,098  |
| X | 70,530,872  | 70,533,274  | X | 58,482,254  | 58,552,353  |
| X | 71,031,948  | 71,032,520  | X | 58,935,238  | 58,935,813  |
| X | 71,274,916  | 71,280,160  | X | 59,149,484  | 59,149,876  |
| X | 72,828,931  | 72,829,029  | X | 60,311,640  | 60,311,787  |
| X | 76,972,255  | 77,112,037  | X | 63,258,839  | 63,258,968  |
| X | 82,569,445  | 82,570,920  | X | 67,452,962  | 67,454,137  |
| X | 84,925,656  | 85,108,711  | X | 69,658,477  | 69,901,940  |
| X | 90,496,766  | 90,499,727  | X | 71,512,643  | 71,516,223  |
| X | 95,745,855  | 96,866,137  | X | 73,015,701  | 73,936,178  |
| X | 101,712,586 | 101,719,523 | X | 79,352,922  | 79,357,403  |
| X | 100,432,607 | 100,432,705 | X | 78,328,067  | 78,328,255  |
| X | 102,846,769 | 102,846,853 | X | 80,237,694  | 80,238,070  |
| X | 105,949,538 | 105,978,948 | X | 83,519,502  | 83,529,215  |
| X | 111,823,875 | 111,890,186 | X | 88,797,856  | 88,863,058  |
| X | 115,379,671 | 115,404,505 | X | 92,008,179  | 92,034,783  |
| X | 113,964,002 | 113,964,166 | X | 90,402,538  | 90,704,070  |
| X | 115,113,915 | 115,116,719 | X | 91,770,814  | 91,774,223  |
| X | 118,152,155 | 118,160,310 | X | 94,400,732  | 94,409,379  |
| X | 119,440,355 | 119,476,053 | X | 95,564,107  | 95,598,791  |
| X | 107,141,183 | 107,203,115 | X | 84,678,489  | 84,733,759  |
| X | 107,742,948 | 107,742,991 | X | 85,281,949  | 85,282,043  |
| X | 131,617,203 | 131,617,409 | X | 106,716,449 | 106,716,695 |
| X | 132,831,535 | 132,831,735 | X | 107,801,012 | 107,801,204 |
| X | 135,466,735 | 135,467,095 | X | 110,061,551 | 110,072,603 |
| X | 136,367,322 | 136,369,053 | X | 110,865,657 | 110,867,833 |
| X | 138,338,415 | 138,371,137 | X | 112,577,381 | 112,577,515 |
| X | 146,312,324 | 146,312,413 | X | 120,590,968 | 120,591,433 |
| X | 139,955,449 | 139,996,804 | X | 114,110,946 | 114,110,837 |
| X | 142,441,463 | 142,443,537 | X | 115,844,975 | 115,851,777 |
| X | 147,288,163 | 147,778,422 | X | 119,926,938 | 120,242,554 |
| X | 152,292,279 | 152,292,386 | X | 124,387,865 | 124,388,072 |
| X | 153,472,108 | 153,510,080 | X | 125,674,147 | 125,674,502 |
| X | 153,570,680 | 153,570,751 | X | 125,923,973 | 125,924,061 |
| X | 153,011,260 | 153,011,521 | X | 125,035,040 | 125,041,044 |
| X | 154,561,177 | 154,570,406 | X | 126,680,993 | 126,696,146 |
| X | 153,058,542 | 153,078,869 | X | 125,091,061 | 125,091,327 |
